**Personality, Subjective Well-Being, and the Serotonin 1a Receptor Gene in Common Marmosets (*Callithrix jacchus*)**

Alexander Weiss<sup>1,2</sup>, Chihiro Yokoyama<sup>3</sup>, Takuya Hayashi<sup>3</sup>, and Miho Inoue-Murayama<sup>2,4</sup>

<sup>1</sup>Department of Psychology, School of Philosophy, Psychology and Language Sciences, The University of Edinburgh; <sup>2</sup>Wildlife Research Center, Kyoto University; <sup>3</sup>Laboratory for Brain Connectomics Imaging, RIKEN Center for Biosystems Dynamics Research; <sup>4</sup>Wildlife Genome Collaborative Research Group, National Institute for Environmental Studies

**Author Note**

Alexander Weiss <https://orcid.org/0000-0002-9125-1555>  
Chihiro Yokoyama <https://orcid.org/0000-0002-1910-3750>  
Takuya Hayashi <https://orcid.org/0000-0001-7639-0197>  
Miho Inoue-Murayama <https://orcid.org/0000-0003-4249-876X>

We have no known conflicts of interest to declare.

This work was supported by Brain/MINDS Beyond from the Japan Agency of Medical Research and Development (AMED) (JP21dm0307006h0002) to TH, KAKENHI Grant Numbers 19H04904 and 20H00420 to MI-M, 18H05090 and 18K06372 to CY. We wish to thank the Leading graduate program in Primatology and Wildlife Science.

We are grateful to Hiromi Kobayashi for technical support and to Mr. Akihiro Kawasaki, Mr. Takashi Fukuoka, and Ms. Chiho Takeda for rating the animals. AW thanks Kyoto University for inviting him to be a Visiting Professor at the Wildlife Research Center.

Chihiro Yokoyama is now at Department of Health Sciences, Faculty of Human Life and Environment, Nara Women's University.

Address correspondence to Alexander Weiss, Department of Psychology, School of Philosophy, Psychology and Language Sciences, The University of Edinburgh, 7 George Square, Edinburgh EH8 9JZ, United Kingdom. Email: [alex.weiss@ed.ac.uk](mailto:alex.weiss@ed.ac.uk)

1 **Abstract**

2 In a previous study of laboratory housed common marmosets (*Callithrix jacchus*), we found  
3 that correlations among personality traits indicated the presence of factors that we labeled  
4 Dominance, Sociability, and a Neuroticism. Unlike two other studies of this species, we did  
5 not find a Conscientiousness, Openness, or Patience factor. Because this discrepancy may  
6 have been attributable to the fact that many purported markers of Conscientiousness were  
7 excluded because of concerns about reliability, we followed up this study by increasing the  
8 sample size from 77 to 128. In addition to this, as we did in our previous study, we gathered  
9 data on subjective well-being in these subjects. We also investigated polymorphisms related  
10 to the serotonin 1a receptor. We found three personality factors—Sociability, Dominance,  
11 and Negative Affect—like those found in our previous study and in other studies of this  
12 species. We also found an Openness factor and a factor that we labeled “Impulsiveness”,  
13 which resembled, but was not identical to, Conscientiousness. In addition, there was evidence  
14 for two higher-order factors: Pro-sociality and Boldness. Further analyses could not rule out  
15 the possibility that the higher-order factors represented a higher-level of personality  
16 organization. Correlations between the first- and higher-order factors and the subjective well-  
17 being measures were consistent with the definitions of the factors. There were no significant  
18 associations between personality and genotype. These results are consistent with the  
19 possibility that, perhaps because common marmosets are cooperative breeders, personality  
20 structure in this species is more labile than in other nonhuman primates and in humans.

21 *Keywords:* behavioral characters, behavioral syndrome, callitrichid, rating, temperament

22 **Introduction**

23 Common marmosets (*Callithrix jacchus*) are small New-World monkeys found in  
24 South America where they inhabit a wide range of habitats [1, 2]. Because of their small size,  
25 fast life history, and other physical and physiological characteristics, common marmosets are  
26 becoming an increasingly popular animal model in biomedical research [3], although some  
27 [e.g., 4] have highlighted the shortcomings of marmoset models.

28 Common marmosets are also becoming popular subjects for research on cognition and  
29 personality. This trend has been driven partly by findings that common marmosets display  
30 behaviors and capabilities once believed to be exclusive to humans and great apes. Common  
31 marmosets, for example, exhibit high levels of spontaneous cooperative behavior [5, 6] and  
32 can discriminate between third parties that do and do not reciprocate [7]. These capabilities,  
33 and others, are believed to have evolved in common marmosets because they, like other  
34 callitrichids, but unlike other nonhuman primates, are cooperative breeders [see 8 for a  
35 review]. In species that are cooperative breeders, rather than disperse and mate, the adult  
36 siblings and offspring of mating pairs often stay within the family unit to help raise offspring,  
37 and so delay or forego reproduction [9].

38 Studies of common marmosets have revealed the presence of stable personality traits  
39 [10, 11], although one study found that these traits can be modified via social facilitation or  
40 social group effects [12]. Studies have also found that personality traits in common  
41 marmosets are heritable and related to well-being [13], associated with the strength of  
42 laterality [14], and the binding potential of serotonin transporters in the brain [15]. Moreover,  
43 different methods, namely those based on behavioral observations and ratings, show evidence  
44 of convergent and discriminant validity in that they are correlated when both assess the same  
45 psychology construct, and uncorrelated when they do not, respectively [16, 17]. However, at

46 least one study has found that evidence for convergent and discriminant validity is not  
47 consistent across different samples [16].

48 One area of personality research to which studies of common marmosets have  
49 contributed is the attempt to reconstruct the evolutionary history of personality structure  
50 using the comparative method [18, 19]. Personality structure refers to the fact that statistical  
51 methods, including factor analysis and principal components analysis [20], but also others  
52 [e.g., 21], reveal that individual traits group into higher-order factors, which represent  
53 personality *domains*. For example, in humans, factor analysis has shown that traits such as  
54 ‘fearful’, ‘vulnerable’ and ‘anxious’ describe the Neuroticism domain while traits such as  
55 ‘active’, ‘social’, and ‘assertive’ describe the Extraversion domain [22, 23].

56 Like findings in other nonhuman primate taxa, including *Macaca* [24], *Pan* [25],  
57 *Saimiri* [26], *Sapajus* and *Cebus* [27-29], and other Callitrichids [30], four studies of common  
58 marmosets [13, 17, 31, 32] have yielded findings consistent with the notion that that the  
59 socioecology of a species influences that species’ personality structure [see 33 for a  
60 discussion]. Despite differences in the origins and housing of subjects, and in how personality  
61 was measured, the five sets of data from these four studies revealed overlapping personality  
62 domains (see Figure 1): all five revealed domains related to sociability [13, 17, 31, 32]; four  
63 revealed domains related to aggressiveness and competitive prowess [13, 17, 31, 32]; three  
64 revealed domains related to anxiety and vigilance [13, 17, 32]; two revealed domains related  
65 to exploratory tendencies [17, 31]; and two revealed domains related to self-control [17, 31].  
66 In addition, two of these studies found a domain—Perceptual Sensitivity [17] and Patience  
67 [31]—that had not been found in other species.

68 The most striking finding from these studies common marmoset personality is that,  
69 although many primate and non-primate species exhibit individual differences in traits related  
70 to self-control [34, 35], these traits formed one or two broad domains. Similar domains had

71 only been found previously in humans *Homo sapiens* [e.g., 36], chimpanzees *Pan troglodytes*  
72 [37-42], bonobos *Pan paniscus* [25], and brown capuchin monkeys *Sapajus apella* [28], all of  
73 which are known for having larger brains. Consequently, the findings in common marmosets  
74 led the researchers to conclude that the cognitive and behavioral demands associated with  
75 cooperative breeding may have led to the evolution of these domains in a small-brained  
76 primate [31].

77         The results from the four studies of common marmosets, however, were not entirely  
78 consistent. Specifically, although they found evidence that marmosets possess up to seven  
79 domains, they varied with respect to which subset of these domains they found. This variation  
80 may be attributable to the fact that, besides perhaps from one study [31], these studies did not  
81 sample enough traits or individuals to capture all the ways in which individuals may differ in  
82 their personality.

83         To address whether this was the case, we followed up our earlier study of personality  
84 in 77 (68 male and 9 female) common marmosets housed at the Kobe, Japan campus of the  
85 Institute of Physical and Chemical Research (RIKEN) [13]. In that study, we did not find a  
86 Conscientiousness, Patience, or, for that matter, an Openness domain. One reason why we  
87 may not have found those domains is that several items related to these domains were  
88 removed because they had interrater reliability estimates that were less than zero [13]. This  
89 can happen if there is not enough between-subjects variance in traits or a large amount of  
90 error variance [43].

91         A low level of between-subjects variance may come about when unmeasured  
92 influences, for example in how animals are housed or bred, overwhelm or make it difficult to  
93 observe or perceive individual differences in one or more traits. However, a study that  
94 compared common marmosets that lived in a laboratory to those that lived in the wild [44]

95 suggests that this does not happen. A low level of between-subjects variance may also come  
96 about because the personalities of individuals conform to that of their group [12].

97 In the present study, we attempted to rule out the possibility that low between-subjects  
98 variance was responsible for the inconsistency between our previous study that only found  
99 evidence for three domains—Dominance, Sociability, and Neuroticism—and the studies that  
100 found additional domains, including Conscientiousness. We therefore increased the between-  
101 subjects variance in the RIKEN sample by increasing the sample size by approximately two-  
102 thirds, which also led to our nearly doubling the ratio of females to males.

103 In addition to trying to find these additional domains in the common marmosets  
104 housed at RIKEN, we examined associations between any personality domains that we  
105 identified and a measure of subjective well-being. Previous studies in humans [45, 46] and in  
106 nonhuman primate species, including chimpanzees [40, 47, 48], orangutans *Pongo* spp. [49],  
107 rhesus macaques *Macaca mulatta* [50], brown capuchin monkeys [51], and common  
108 marmosets [13], have shown a consistent pattern of relationships between personality and  
109 measures of well-being or welfare. Specifically, personality domains associated with  
110 gregariousness, assertiveness, activity, and other traits associated with Extraversion [52] were  
111 related to higher subjective well-being and personality domains made up of traits associated  
112 with vigilance, fearfulness, anxiety, and other traits associated with Neuroticism [53] were  
113 associated with lower subjective well-being. By testing for associations between the  
114 personality domains and subjective well-being in this study, then, we could assess the degree  
115 to which the personality domains we find are measures of distinct psychological constructs.

116 Finally, we tested whether a set of genetic polymorphisms were associated with  
117 personality. A previous study found that lower Dominance and lower Neuroticism in  
118 common marmosets were both associated with the AA genotype of the  $\mu$ -opioid receptor  
119 gene; lower Neuroticism was additionally associated with the short form of the arginine

120 vasopressin receptor 1A gene [13]. For the present study we focused on single nucleotide  
121 polymorphisms (SNPs) of the serotonin receptor 1a gene. A study of chimpanzees identified  
122 a SNP (rs25209664: C743A) that caused a proline to glutamine substitution at the 248<sup>th</sup>  
123 amino acid of the serotonin receptor 1a gene. This polymorphism was associated with  
124 aggression and sociability: chimpanzees who possessed two C alleles engaged in less social  
125 grooming and were rated as more anxious [54]. This study also found evidence for some  
126 interactions: males with the CC genotype displayed more often and, of chimpanzees with the  
127 AC genotype, mid-ranking individuals had lower proximity scores [54].

## 128 **Method**

### 129 **Subjects**

130 Subjects were 128 common marmosets (99 males, 29 females) that ranged in age from  
131 1.6 to 15.1 (mean = 4.8, SD = 2.7). Subjects were recruited in three waves. The 77 subjects  
132 from the first wave had taken part in a similar previous study [13] and included 68 males and  
133 9 females ranging in age from 1.5 to 15.1 years (mean=6.0, SD=2.6). Subjects from the  
134 second and third waves were born at RIKEN. The 24 subjects from the second wave included  
135 17 males and 7 females ranging in age from 1.7 to 4.5 years (mean = 2.6, SD = 0.7) and the  
136 27 subjects from the third wave included 14 males and 13 females ranging in age from 2.0 to  
137 4.9 years (mean = 3.0, SD = 0.8).

### 138 **Animal Housing and Husbandry**

139 Subjects were housed in the RIKEN Center for Biosystems Dynamics Research in  
140 Kobe, Japan. One hundred and twelve subjects were born at the center, six were supplied by  
141 CLEA Japan Inc. (Tokyo, Japan), and 10 were supplied by Japan Wild Animal Laboratory  
142 Limited (Amami, Japan). Subjects sourced from other facilities had lived in the center for at  
143 least three years prior to this study.

144 At RIKEN, subjects were housed in breeding rooms that had a 12 h light-dark cycle  
145 (light: 08:00–20:00). Enclosures (1630 × 760 × 831 mm for families, 660 × 650 × 600 or 660  
146 × 450 × 600 mm for pairs or individuals) had wooden perches, a plastic cube-shaped shelter,  
147 a food tray, and a water dispenser. There were around twenty cages in each breeding room  
148 and so even if animals were individually housed, they were exposed to visual, auditory, and  
149 olfactory stimulation from conspecifics. The temperature and humidity in the breeding room  
150 were maintained at approximately 28°C and 50%, respectively. In the morning and afternoon,  
151 subjects received solid food (CMS-1, CLEA Japan, Inc., Tokyo, Japan) mixed with an  
152 appropriate amount of water to soften it, powdered milk formula, honey, gluconic acid,  
153 calcium, vitamin C, and lactobacillus probiotic. Food in the afternoon was softened into a  
154 paste by soaking it in water and then stirring it. Once a week subjects' diets were  
155 supplemented with chopped and boiled eggs or bananas.

### 156 **Animal Rearing**

157 Animals reared by their parents and/or their family members, including one to five  
158 older brothers or sisters, were reared in family cages. At around 14 days after birth, when  
159 they were still infants, these subjects were fed a food paste in the afternoon. When these  
160 individuals were between 6 and 15 months old, to ensure that they were provided with the  
161 required amount of space, they were transferred from their family cage to a home cage (0.21  
162 to 0.43m<sup>2</sup> floor space per animal). Animals living in these home cages were same-sex,  
163 mixed-age peers. Individuals that were to be used in brain imaging [55] or in behavioral  
164 studies, and individuals that did not get along with their partners, were single housed.

165 Animals that were not reared by their parents, for example, in the event of a triplet  
166 birth or parental neglect, were hand-reared in climate-controlled rearing cages by human  
167 caregivers. This procedure has been described elsewhere [13]. In short, these animals were  
168 housed in a thermal insulation box and a towel roll from one day to 21 days after birth. Then,



169 from 21 days after birth to weaning, these animals were housed in a wire-mesh box sized 390  
170  $\times$  230  $\times$  300 mm furnished with a hammock, perches, a towel roll, a feeding dish, and a water  
171 bottle. These animals were breastfed on the day of their birth and then bottle-fed until  
172 weaning. A food paste was introduced at around 28 days and then animals were weaned fully  
173 50 to 70 days after birth. After weaning, these animals were housed in a home cage with  
174 peers or individually in the breeding room.

175 Of the 77 subjects from the first wave, 30, including 23 parent-reared and seven hand-  
176 reared subjects, were housed in a family group ( $n = 13$ ) or with same-sex peers ( $n = 17$ ). The  
177 remaining 47 subjects, including 33 that were parent-reared, 13 that were hand-reared, and  
178 one with an unknown rearing history, were single-housed. Of the 24 subjects from the second  
179 wave, 22, including 18 that were parent-reared, 3 that were hand-reared, and one with an  
180 unknown rearing history, were housed in a family group ( $n = 7$ ), with an opposite sex  
181 marmoset for breeding ( $n = 2$ ), or with same-sex peers ( $n = 13$ ). The remaining two subjects  
182 from the second wave were parent-reared and single-housed. Of the 27 subjects from the  
183 third wave, 25 parent-reared subjects and one hand-reared subject were housed in a family  
184 group ( $n = 1$ ), with an opposite-sex marmoset for breeding ( $n = 4$ ), with same-sex peers ( $n =$   
185 19), or single-housed ( $n = 2$ ). The remaining subject was parent-reared and single-housed.

## 186 **Ratings**

### 187 *Questionnaires*

188 **Personality.** To assess personality, we used the Hominoid Personality Questionnaire  
189 (HPQ).<sup>1</sup> Each of the HPQ's 54 items consists of a trait adjective paired with one to three  
190 sentences that set the adjective in the context of primate behavior. For example,  
191 “**FEARFUL**” (boldface and capitals in the original) is paired with the descriptor sentence  
192 “Subject reacts excessively to real or imagined threats by displaying behaviors such as

---

<sup>1</sup> The HPQ can be obtained at <https://extras.springer.com/2011/978-1-4614-0176-6.zip>

193 screaming, grimacing, running away or other signs of anxiety or distress.” The HPQ’s  
194 instructions ask raters to **a**) judge the standing of each animal on each trait based on the  
195 animal’s behavior and interactions with others, and the rater’s own judgement of what  
196 constitutes average behavior for this species, **b**) assign a rating of 1 (“Displays either total  
197 absence or negligible amounts of the trait.”) to 7 (“Displays extremely large amounts of the  
198 trait.”) to each item, and **c**) not discuss their ratings with their fellow raters.

199 A description of the HPQ’s development can be found elsewhere [56]. Briefly, the  
200 HPQ grew out the 48-item Orangutan Personality Questionnaire [49], which grew out of the  
201 43-item Chimpanzee Personality Questionnaire [39]. Forty-one of the HPQ’s 54 items were  
202 sampled from Goldberg’s [57] trait terms of the five major domains of human personality  
203 [39]. The remaining 13 items were adapted from items [58] or facets [59] from other human  
204 personality inventories, or were created for by the authors of these instruments [39, 40, 49].

205 For this study, we used a version of the HPQ that had been translated into Japanese  
206 using a back-translation procedure. A study of chimpanzees revealed that the translation did  
207 not affect the HPQ’s psychometric properties [40].

208 **Subjective Well-Being.** Ratings were made on a four-item scale that was based on a  
209 questionnaire used to measure subjective well-being in captive chimpanzees [47]. Each item  
210 was devised to assess a different concept of subjective well-being that had been described in  
211 the human literature [47, 60-64]. The first item (moods) concerned the extent to which an  
212 individual experienced positive versus negative affect. The second item (social) concerned  
213 whether the individual experienced pleasure from social interactions. The third item (goals)  
214 concerned whether the individual was able to achieve its goals, bearing in mind that different  
215 individuals may have different, personal goals. The fourth item (be marmoset) asked raters  
216 how “happy” they would be if they were that marmoset for a week and was thus meant to  
217 measure global satisfaction. The subjective well-being scale’s instructions asked raters to

218 assign a rating of 1 (“Displays either total absence or negligible amounts of the trait or  
219 state.”) to 7 (“Displays extremely large amounts of the trait.”) to each item. The instructions  
220 also request that raters do not discuss their ratings.

221 For this study, we used a version of the subjective well-being questionnaire that had  
222 been translated into Japanese using a back-translation procedure. A study of chimpanzees  
223 revealed that the translation did not affect this questionnaire’s psychometric properties [40].

#### 224 ***Raters and Ratings***

225 We asked three keepers (two men and one woman) who had completed the  
226 questionnaires in the first wave of data collection [see 13 for details] completed the  
227 questionnaires for the second and third wave of data collection. The keepers did not know the  
228 results of the previous study or the purpose of collecting the data. The keepers had known the  
229 subjects they rated for 1.1 to 9.8 years (mean = 3.7 years, SD = 2.2). Two keepers (one man  
230 and one woman) rated all 128 subjects and the third rated 81 subjects. This resulted in a total  
231 of 337 ratings or an average of 2.63 ratings per subject. There were no missing ratings data.

#### 232 **Genotyping**

233 A buccal swab was taken from each subject and kept in a 90% ethanol solution until  
234 DNA extraction. DNA was extracted by DNeasy Blood and Tissue kit (Qiagen, CA, USA).  
235 PCR amplification was conducted in a 10 µl (the total volume) reaction mixture containing  
236 10ng of DNA template, 0.4 µM of each primer (forward: 5’-tggattcccttcccgaaa-3’, reverse:  
237 5’-aggtgttgattccctagggt-3’), 0.5U of LA Taq DNA polymerase, 400 µM of dNTPs, and GC  
238 buffer I (TaKaRa, Shiga, Japan). After denaturing DNA samples at 95°C for 1 min, we set up  
239 40 cycles of 95°C for 30 seconds, 60°C for 30 seconds, 74°C for 1 minute, and a final  
240 extension at 74°C for 10 minutes. A total of 1,473 base pair fragments including whole single  
241 exon region were amplified. We then sequenced the polymerase chain reaction products, both  
242 forwards and backwards, using 3130xl Genetic Analyzer (Applied Biosystems, CA, USA).

243 The internal primer 5'-tcatgctggttctctatggg-3' was also used for sequencing. Primers were  
244 designed based on the NCBI Reference Sequence NC\_013897. In the end, we identified three  
245 novel SNPs (G840C, G841A, and T901A) in the third intracellular region of the receptor (see  
246 Figures 2 and 3). G840C was a synonymous SNP coding alanine at the 280<sup>th</sup> amino acid  
247 sequence, G841A was a nonsynonymous SNP that caused a methionine substitution at the  
248 281<sup>st</sup> amino acid sequence, and T901A was a nonsynonymous SNP that caused a serine to  
249 threonine substitution at the 301<sup>st</sup> amino acid sequence.

## 250 **Analyses**

251 We conducted the analyses using version 3.6.3 of R [65]. We used functions from  
252 version 1.9.12 of the psych package [66], version 1.0.7 of the EFA.MRFA package [67], and  
253 some custom functions.

### 254 ***Item Interrater Reliabilities***

255 We used a custom function in R to compute the interrater reliabilities of the HPQ and  
256 subjective well-being questionnaire items. This function computed two intraclass correlations  
257 (*ICCs*) described by Shrout and Fleiss (43). The first, *ICC*(3,1), indicates the reliability of  
258 individual ratings, that is, it is an estimate of the reliability of the rating from a single rater.  
259 The second, *ICC*(3,*k*), indicates the reliability of the mean rating coming from *k* raters, which  
260 was equal to 2.63 in the present study. We excluded items that had reliabilities that were not  
261 greater than zero [see 56 for a discussion].

### 262 ***Exploratory Factor Analyses***

263 **Personality.** We conducted these analyses on the aggregate (mean) of personality  
264 ratings for the 128 subjects. Simulation studies [68-70] have shown that the number of  
265 subjects required for satisfactory recovery of factors is a function of item communalities, item  
266 loadings, and the item:factor ratio, and that the subject:item ratio is irrelevant. Previous  
267 rating-based studies of common marmoset personality [13, 17, 31] have found that between

268 72% and 97% of questionnaire items were reliable, a total of three to five factors, median  
269 salient loadings of around .6 or .7, and communalities that were between wide and high [see  
270 ref 69 for definitions of these types of communalities]. As such, we have a large enough  
271 sample size to conduct factor analyses on these data.

272 Before extracting factors using the maximum likelihood procedure, we determined  
273 how many factors to extract. To do so, we used the `fa.parallel` function from the `psych`  
274 package to generate a scree plot, which we inspected, and to conduct a parallel analysis [71]  
275 in which we compared eigenvalues from a principal components analysis of our data to the  
276 distribution of 1000 eigenvalues generated from principal components analysis of resampled  
277 and randomly generated data. We used principal components analysis for our parallel  
278 analysis because a recent study showed that the number of dimensions identified in this  
279 manner is more accurate [72]. In addition, we used the `VSS` function from the `psych` package  
280 to determine, for one to eight factor solutions, which had the lowest Bayesian Information  
281 Criterion [BIC; 73], and the `hulleFA` function from the `EFA.MRFA` package to determine the  
282 number of factors via the Hull method [74], which is known to perform well with personality  
283 data [75]. Finally, we inspected the factors obtained to ensure that they were interpretable.

284 After we extracted factors using the `fa` function from the `psych` package, we applied  
285 an oblique (promax) and an orthogonal (varimax) rotation. If the promax rotation yielded  
286 factors that were strongly correlated and/or a different structure, we retained and interpreted  
287 those factors. Otherwise, we retained and interpreted the varimax-rotated factors.

288 In interpreting the factors, we specified that salient loadings were those equal to or  
289 greater than |0.4|. We labeled factors based on our interpretations of them and attempted to  
290 find suitable labels from previous findings in common marmosets, and, if none were  
291 available, from studies of nonhuman primates and humans. If we could not find a label from  
292 these sources, we devised our own.

293 In addition to conducting this first-order factor analysis, we found evidence (results to  
294 be discussed) suggesting that there may be second-order personality factors underlying these  
295 data. We thus conducted an exploratory factor analyses of the inerfactor correlation ( $\Phi$ )  
296 matrix obtained from the promax-rotated factors. For the same reason, we conducted an  
297 additional item-level factor analysis as a robustness check.

298 **Subjective Well-Being.** We conducted a maximum likelihood factor analysis using  
299 the fa function on aggregated (mean) ratings for all 128 subjects. Previous work in 77 of  
300 these subjects revealed a single factor [13].

### 301 *Unit-Weighted Factor Scores*

302 For the remaining analyses, we used a custom R function to compute unit-weighted  
303 factor scores [20, 76] for the personality and subjective well-being data. This involved, for  
304 each item, finding the largest salient factor loading. If that loading was positive, we assigned  
305 it a weight of +1. If that loading was negative, we assigned it a weight of -1. In all other  
306 cases, we assigned a weight of zero. After We then summed the weighted item ratings.

### 307 *Factor Reliabilities*

308 For the first- and second-order personality factors, and for subjective well-being, we  
309 used the same custom function to compute Shrout and Fleiss's  $ICC(3,1)$  and  $ICC(3,k)$  for the  
310 items to compute these  $ICCs$ . As with the item-level analyses,  $k$  was equal to 2.63. In  
311 addition, we used the alpha function from the psych package to compute Cronbach's alpha  
312 ( $\alpha$ ), a measure of the internal consistency reliability of a scale, and the omega function to  
313 compute McDonald's omega hierarchical ( $\omega_h$ ), a measure of the degree to which a general  
314 factor saturates a scale's items.

### 315 *Personality Factor Comparisons*

316 To compare the first- and second-order factors to factors found in previous studies of  
317 common marmoset personality [13, 17, 31], we first generated unit-weighted factor scores

318 based on the personality structures described in these other studies. Because there was not a  
319 total overlap of questionnaire items across these studies, we sometimes had to substitute  
320 items that were similar in meaning or in the constructs that they purportedly assessed. Details  
321 about how these scores were created can be found in Table S1. After computing these unit-  
322 weighted factor scores, we obtained correlations between the scores based on the factor  
323 loadings from the present study and the scores based on component and factor loadings from  
324 previous studies. We compared the absolute magnitudes of these correlations and highlighted  
325 the highest correlation or, in the case where the confidence intervals of two or more  
326 correlations overlapped, highest correlations.

### 327 *Personality-Subjective Well-Being Associations*

328 We used Pearson correlation coefficients to examine associations between the first-  
329 and second-order personality factors and, both, the subjective well-being items and the total  
330 of these items. We used Holm's method [77] to adjust for familywise error rates.

### 331 *Genetic Associations*

332 To examine the genotype-personality associations, for the first- and second-order  
333 personality factors, we fit linear models using the lm function. For these analyses, we  
334 standardized the personality factor scores (mean = 0, SD = 1). The variables in the models  
335 included sex (male = 1, female = 0), age in years, and a categorical variable that indicated  
336 genotype. Because there were problems with genotyping four subjects, these individuals were  
337 excluded from the analyses. In addition, the G840C genotypes for two subjects and T901A  
338 genotype for one subject were unclear, and so these individuals were not included in tests of  
339 associations between personality and the G840C and T901A genotype, respectively. Finally,  
340 only one subject had the AA version of G841A and only nine subjects had the GA version of  
341 this genotype. We therefore did not examine associations between these genotypes and  
342 personality.

343           Although subjects were related, we did not test for the effect of genotypes within the  
344 context of an animal model [cf. 13]. Moreover, because we conducted multiple, sometimes  
345 non-independent, tests, we used the Bonferroni correction to adjust for familywise error rates.

#### 346 **Ethics**

347           This study complied with the current laws of Japan, including the Act on Welfare and  
348 Management of Animals. All experimental and husbandry procedures were performed in  
349 accordance with RIKEN's Guidelines for Conducting Animal Experiments, and in  
350 accordance with the ARRIVE (Animal Research: Reporting of In Vivo Experiments)  
351 guidelines. All procedures were approved by the Animal Care and Use Committee of the  
352 Kobe Institute of RIKEN (MA2009-10-16).

### 353 **Results**

#### 354 **Interrater Reliabilities of Items**

##### 355 *Personality*

356           The interrater reliabilities of the 54 HPQ items are presented in Table 1. The  
357 reliabilities of individual ratings and of mean ratings for the items 'anxious', 'persistent',  
358 'quitting', and 'unperceptive' were negative, and so we excluded these items from further  
359 analyses. Although the reliability of mean ratings for the items 'innovative' and 'decisive'  
360 were equal to 0.01, the reliabilities of individual ratings for these items were less than 0.01,  
361 and so we decided to exclude those items from further analyses.

362           Of the remaining 48 items, the interrater reliabilities of individual ratings ranged from  
363 0.02 ('inventive') to 0.45 ('sociable'). The mean and standard deviation for these estimates  
364 were 0.21 and 0.11, respectively. The interrater reliabilities of mean ratings for the remaining  
365 items ranged from 0.06 ('inventive') to 0.68 ('sociable'). The mean and standard deviation  
366 for these estimates were 0.40 and 0.16, respectively.

##### 367 *Subjective Well-Being*



368           The interrater reliabilities of individual ratings were 0.16, 0.10, 0.15, and 0.14 for the  
369   moods, social, goals, and global well-being items, respectively. The corresponding  
370   reliabilities of mean ratings were 0.33, 0.23, 0.32, and 0.30.

### 371   **Maximum Likelihood Exploratory Factor Analyses**

#### 372   *Personality*

373           **First-Order Analysis.** The scree plot (see Figure S1) and parallel analysis indicated  
374   that there were five factors. The Hull method (see Figure S2) also indicated that there were  
375   five factors, and BIC achieved a minimum with five factors. We therefore extracted five  
376   factors.

377           A promax rotation of the five-factor solution yielded two interfactor correlations that  
378   were large ( $r_s \geq |0.5|$ ) and two that were medium-sized ( $r_s \geq |0.3|$ ). The mean and standard  
379   deviation of the absolute interfactor correlations were 0.26 and 0.20, respectively.

380   Comparison of the varimax- and promax-rotated factors revealed that the congruence  
381   coefficients for two factors fell below 0.95 (see Table S2) and an inspection of the loadings  
382   indicated that the promax-rotated factors differed some from their varimax-rotated  
383   counterparts. Given these results, we interpreted the promax-rotated factors (see Table 2),  
384   which explained 63% of the variance (the varimax-rotated factors are presented in Table S3).

385           The first factor loaded on items related to high Extraversion and high Agreeableness  
386   in humans [e.g., 57]. This factor resembled the Sociability factor in one study [13] and the  
387   Agreeableness factor from two other studies [17, 31] of common marmosets.

388           The second factor loaded on items related to high Extraversion and low  
389   Agreeableness in humans [e.g., 57]. Compared to other studies of common marmosets, it is  
390   best described as a narrow version of factors labeled Dominance [13], Extraversion [17], and  
391   Assertiveness [31]. To be consistent with a prior study of a subset of these subjects [13], we  
392   labeled this factor Dominance.

393           The third factor had positive loadings on items related to high Neuroticism and low  
394   Conscientiousness in humans, and also negative loadings on items related to low Neuroticism  
395   and high Conscientiousness [e.g., 57]. In a previous study of a subsample of these animals  
396   [13], the Dominance and Neuroticism factor loaded on some of these items. Compared to  
397   other studies of common marmosets, it resembled most closely the factors labeled  
398   Conscientiousness and Patience in one study [31] and the Conscientiousness factor in another  
399   [17]. Humans that are high in Neuroticism and low in Conscientiousness are described as  
400   exhibiting an undercontrolled style of impulse control [78]. We thus labeled this factor  
401   Impulsiveness.

402           With the exception of a negative loading on the item cautious, the fourth factor loaded  
403   primarily on items related to high Openness in humans [e.g., 57]. Previous studies of  
404   common marmosets have labeled factor such as these Openness [17] and Inquisitiveness [31].  
405   We therefore labeled this factor Openness.

406           The fifth factor loaded on items related to low Extraversion and high Neuroticism in  
407   humans [e.g., 57]. In the previous study of a subset of these animals [13], Neuroticism had a  
408   positive loading on many of these items. In all three previous studies of this species, factors  
409   such as Dominance, Assertiveness, and Conscientiousness had negative loadings on these  
410   items [13, 17, 31]. Given that this factor combined aspects of high Neuroticism and low  
411   degrees of Assertiveness or social prowess, we labeled it Negative Affect.

412           **Second-Order Analysis.** Because there were several non-negligible correlations  
413   between the just-described factors, we factor analyzed the factor intercorrelation (Phi) matrix.  
414   This enabled us to test whether there were any second-order factors.

415 Inspection of the scree plot (see Figure S3) and parallel analysis indicated that there  
416 were two factors; BIC was lowest for the two-factor solution.<sup>2</sup> We also tried to extract a  
417 single ‘general’ factor, but this solution exhibited poor fit (root mean square of the residuals  
418 = 0.14), and the factor did not have a salient loading on Openness or on Negative Affect. A  
419 promax rotation of the two-factor solution indicated that they were close to being orthogonal,  
420 and the loadings of the varimax-rotated factors were nearly identical to those of the promax-  
421 rotated factors (see Table 3). We therefore interpreted the varimax-rotated factors, which  
422 accounted for 49% of the variance. After reflecting (multiplying loadings by -1) the first  
423 factor, it had a positive loading on Sociability and a negative loading on both Dominance and  
424 Impulsiveness. We thus labeled this factor Pro-sociality. The second factor had a positive  
425 loading on Openness and a negative loading on Negative Affect. We thus labeled this factor  
426 Boldness.

427 **Robustness Checks.** Previous studies of common marmosets did not find evidence  
428 higher-order factors, that is, interfactor correlations tended to be modest [13, 17, 31].  
429 Therefore, to investigate these findings further, we conducted two robustness checks.

430 The first check was to test whether the higher-order factors reflected the structuring of  
431 data collection. Specifically, because different subjects were rated in each wave, this may  
432 have led raters to rate the subjects belonging to each wave as resembling one another more  
433 than they did subjects in other waves. To test this, we residualized the 48 reliable items on a  
434 categorical variable that represented whether the subject was rated in the first, second, or  
435 third wave. We then factor analyzed the residualized item scores.

436 Inspection of the scree plot (see Figure S4) suggested that there were four or five  
437 factors and parallel analysis indicated that there were four factors. The Hull test indicated that

---

<sup>2</sup> We did not conduct a Hull test because the hullIEFA function cannot be used to examine correlation matrices.

438 there were two factors (see Figure S5). The BIC was lowest for a five-factor solution. We  
439 therefore examined promax-rotations after extracting two, four, and then five factors.

440 For the two-factor solution (see Table S4), the first factor loaded predominantly on  
441 items onto which the factors Sociability, Dominance, and Impulsiveness had loaded. It  
442 therefore resembled the higher-order factor Pro-sociality. The second factor loaded  
443 predominantly on items onto which the factors Openness and Negative Affect had loaded. It  
444 therefore resembled the higher-order factor Boldness. For the four-factor solution (see Table  
445 S5), the first, third, and fourth factors resembled Sociability, Negative Affect, and Openness.  
446 The second factor loaded predominantly on items related to high Dominance and high  
447 Impulsiveness. The five-factor solution yielded five factors that resembled the five factors  
448 that has been found earlier (see Table S6).

449 The similarity, as indicated by Tucker's congruence coefficients, between the five  
450 factors obtained before and after item scores were residualized were equal to or greater than  
451 0.98, suggesting that these were the same factors (see Table S7). Factor analysis of the  
452 residualized item scores, then, revealed either the same structure (the five-factor solution) or  
453 structures in which there were stronger associations between factors (the two- and four-factor  
454 solutions). These results are not consistent with the possibility that the higher-order factors  
455 reflect the fact that we collected these data in three stages.

456 The second check was to test whether the second-order factors are general evaluative  
457 factors used by raters [cf. 79]. To do so, we factor analyzed ratings from each of the three  
458 raters separately. We also factor analyzed a weighted correlation matrix from which removed  
459 possible effects of raters:

$$\mathbf{R}_w = \frac{1}{N} \sum_{i=1}^k \mathbf{R}_i n_i$$

460 where  $\mathbf{R}_w$ , the weighted correlation matrix, is the sum of the products of the correlation  
461 matrices of each of  $k = 3$  raters,  $\mathbf{R}_i$ , and the subjects,  $n_i$  rated by that individual rater, divided  
462 by the total number of subjects,  $N$ .

463 For ratings from one keeper who rated all the subjects, the scree plot (see Figure S6),  
464 parallel analysis, BIC, and Hull method (see Figure S7) indicated that there were five factors.  
465 We thus extracted five factors and subjected them to a promax rotation (see Table S8). The  
466 factors resembled those obtained in the initial factor analysis and the interfactor correlations  
467 were similar in magnitude. We then conducted a second-order factor analysis in which we  
468 forced a two-factor solution. Although one second-order factor just missed our criterion for a  
469 salient loading on a first-order factor, these factors resembled Pro-sociality (reversed) and  
470 Boldness (see Table S9).

471 For ratings from the second keeper who rated all the subjects, the scree plot (see  
472 Figure S8) indicated that there were five factors and parallel analysis, the BIC, and the Hull  
473 method (see Figure S9) indicated that there were four factors. We thus extracted four factors  
474 and subjected them to a promax rotation (see Table S10). The first factor appeared to be a  
475 Dominance versus Agreeableness, the third factor was Gregariousness (a narrow facet of  
476 Extraversion), and the last two factors were difficult to interpret. The interfactor correlations  
477 were not consistent with there being a second-order factor.

478 For ratings from the keeper who rated 81 subjects, the scree plot (see Figure S10) and  
479 parallel analysis, the BIC, and Hull method (see Figure S11) indicated that there were three  
480 factors. We thus extracted three factors and subjected them to a promax rotation (see Table  
481 S11). These factors included Agreeableness versus Dominance, Extraversion, and Negative  
482 Affect/Impulsiveness, respectively.

483 For the weighted correlation matrix, the scree plot indicated that there were five  
484 factors (see Figure S12) and both the parallel analysis, and the BIC indicated that there were

485 three factors. We thus extracted three factors and subjected them to a promax rotation (see  
486 Table S12). The first and third factors loaded on many of the traits that belonged to the  
487 factors that made up the second-order Pro-sociality and Boldness domains, respectively. The  
488 second factor was an Impulsiveness factor. The correlation between the first and third factors  
489 was low, but the correlation between Impulsiveness and Pro-sociality was between medium  
490 and large, and therefore was consistent with the definitions of these factors.

491 We then extracted five factors and subjected them to a promax-rotation (see Table  
492 S13). The five factors resembled those from our initial factor analyses as did the interfactor  
493 correlations. The scree plot indicated that there were two factors (see Figure S13) as did both  
494 the parallel analysis and the BIC. The first higher-order factor was, when reflected, a Pro-  
495 sociality factor. The second higher-order factor was a Boldness factor (see Table S14).

#### 496 *Subjective Well-Being*

497 Inspection of the scree plot (see Figure S14), parallel analysis, and the BIC all  
498 indicated that there was a single factor.<sup>3</sup> This factor explained 67% of the variance and had  
499 salient loadings on all four items (see Table 4).

#### 500 **Reliabilities of Factors**

##### 501 *Personality*

502 The interrater reliabilities of the individual ratings for Sociability, Dominance,  
503 Impulsiveness, Openness, and Negative Affect were 0.52, 0.39, 0.28, 0.26, and 0.25,  
504 respectively. The interrater reliabilities of mean ratings for these factors were 0.74, 0.63,  
505 0.50, 0.48, and 0.46, respectively. For Pro-sociality and Boldness, respectively, the interrater  
506 reliabilities of individual ratings were 0.45 and 0.30, and the interrater reliabilities of mean  
507 ratings for these second-order factors were 0.69 and 0.53.

---

<sup>3</sup> We conducted a Hull test for this analysis, too, but doing so produced a warning, which we suspect was attributable to there only being four items. The Hull test nevertheless indicated that there was one factor.

508           The internal consistency reliability (Cronbach's  $\alpha$ ) for Sociability, Dominance,  
509 Impulsiveness, Openness, and Negative Affect were 0.95, 0.95, 0.88, 0.85, and 0.81,  
510 respectively. The degree to which a general factor saturated these factors (McDonald's  $\omega_h$ )  
511 was 0.81, 0.85, 0.75, 0.80, and 0.68, respectively.

### 512 *Subjective Well-Being*

513           For the total subjective well-being score, the interrater reliability of individual ratings  
514 was 0.21 and the interrater reliability of the mean of ratings 0.41. Cronbach's  $\alpha$  for this scale  
515 was 0.87 and McDonald's  $\omega_h$  was 0.13.

### 516 **Personality Factor Comparisons**

517           Iwanicki and Lehmann (17) found four factors. Compared to our first-order factors,  
518 their Extraversion factor overlapped with Dominance and Negative Affect, their  
519 Agreeableness factor overlapped with Sociability and (low) Dominance, their  
520 Conscientiousness factor overlapped with Sociability, and their Openness factor overlapped  
521 with the same-named factor that we found (see Table 5). Compared to our second-order  
522 factors, Iwanicki and Lehman's Extraversion overlapped with (low) Pro-sociality and high  
523 Boldness; their Agreeableness and Conscientiousness factors overlapped with Pro-sociality;  
524 and their Openness factor overlapped with Boldness (see Table 6).

525           Koski, Buchanan-Smith (31) found five factors. Compared to our first-order factors,  
526 their Conscientiousness factor overlapped with (low) Dominance and (low) Impulsiveness;  
527 their Agreeableness factor overlapped with Sociability; their Assertiveness factor overlapped  
528 with (low) Sociability, Dominance, and (low) Negative Affect; their Patience factor  
529 overlapped with Sociability; and their Inquisitiveness factor overlapped with Openness (see  
530 Table 5). Compared to our second-order factors, their Conscientiousness, Agreeableness, and  
531 Patience factors all overlapped with Pro-sociality; their Assertiveness factor overlapped with

532 Boldness and (low) Pro-sociality; and their Inquisitiveness factor overlapped with Boldness  
533 (see Table 6).

534 Inoue-Murayama, Yokoyama (13) found three factors. Compared to our first-order  
535 factors, their Dominance factor overlapped with Dominance; their Sociability factor  
536 overlapped with Sociability; and their Neuroticism factor overlapped with Negative Affect  
537 (see Table 5). Compared to our second-order factors, their Dominance and Sociability factors  
538 overlapped with low and high Pro-sociality, respectively; their Neuroticism factor overlapped  
539 with (low) Boldness (see Table 6).

#### 540 **Personality and Subjective Well-Being Associations @ @ @**

541 The correlations between the subjective well-being items and the personality factors  
542 are presented in Table 7. Sociability was significantly associated with higher scores on all  
543 four items and the total subjective well-being score. Dominance was not significantly related  
544 to any of the scale's items or the factor. Impulsiveness was significantly related to lower, and  
545 Openness was significantly related to higher, balance of positive versus negative moods, how  
546 happy raters thought they would be if they were the marmoset, and the total subjective well-  
547 being score. Negative Affect was negatively related to how happy raters would be how happy  
548 raters thought they would be if they were the marmoset. Of the second-order factors, Pro-  
549 sociality was significantly associated with being rated as higher on all items save for the  
550 ability to achieve goals, and the total subjective well-being score. Boldness was not  
551 significantly associated with the pleasure subjects derived from social interactions, but it was  
552 significantly related to being higher in the other three items and in the total subjective well-  
553 being score.

#### 554 **Personality-Genotype Associations**

##### 555 *G840C Genotypes*



556 Twenty-seven subjects had the GG genotype, 23 had the CC genotype, and 72 were  
557 heterozygous. In the first set of analyses, we compared subjects with the GC genotype and  
558 subjects with the GG genotype to those with the CC genotype. Compared to subjects with the  
559 CC genotype, subjects with the GC or GG genotypes were significantly higher in Dominance;  
560 these associations, however, did not prevail correction for multiple tests (see Table S15). In a  
561 second set of analyses, we compared the 95 subjects who were carriers of the C allele (CC or  
562 GC genotype) to the 27 subjects with the GG genotype. None of the comparisons were  
563 statistically significant (see Table S16). In a third set of analyses, we compared the 99  
564 subjects who were carriers of the G allele (GG or GC genotype) to the 23 subjects with the  
565 CC genotype. Carriers were significantly higher in Dominance, but this effect did not prevail  
566 correction for multiple tests (see Table S16).

567 ***T901A genotypes***

568 Twelve subjects had the TT genotype, 35 had the AA genotype, and 76 were  
569 heterozygous. Because of this imbalance in the number of subjects, we only compared the 88  
570 subjects who carried the T allele to the 35 subjects with the AA genotype. None of the  
571 comparisons were statistically significant (see Table S17).

572 **Discussion**

573 We found five personality domains—Sociability, Dominance, Impulsiveness,  
574 Openness, and Negative Affect—in common marmosets and higher-order domains that we  
575 labeled Pro-sociality, which had a positive loading on Sociability and negative loadings on  
576 Dominance and Impulsiveness, and Boldness, which had a positive loading on Openness and  
577 a negative loading on Negative Affect. The interrater reliabilities of these domains were  
578 comparable to what has been found in studies of other primate species [80], including  
579 humans [e.g., 81] and they were related to subjective well-being and its constituent items in

580 ways consistent with their meaning. We found no strong evidence that either personality or  
581 subjective well-being was associated with polymorphisms of the serotonin 1a receptor gene.

582         The personality domains that we found in the present study overlapped, although not  
583 completely, with those found in prior studies of common marmosets. Openness resembled  
584 eponymous domains, or a domain labeled Inquisitiveness, identified in previous studies [13,  
585 17, 31, 32]. Moreover, although we did not find a clear Conscientiousness factor, as did two  
586 previous studies [17, 31], Impulsiveness and Pro-sociality overlapped with Conscientiousness  
587 in that all three were related to behavioral consistency and reliability, prosociality, tolerance,  
588 and low levels of aggression [17, 31]. Impulsiveness, however, was also related to  
589 emotionality and reactivity whereas Conscientiousness was not. Finally, Dominance,  
590 Sociability, and Negative Affect resembled domains found in earlier studies [13, 17, 31, 32].  
591 On the other hand, although they may have been represented by Pro-sociality, we did not find  
592 strong evidence for a Patience [31] or a Perceptual Sensitivity [17] (which may be the same  
593 construct [31]) domain.

594         Unlike past rating-based studies that did not find higher-order factors in common  
595 marmosets [13, 17, 31], we found two second-order factors. In follow-on analyses, we found  
596 that these higher-order domains partly reflect a tendency for raters to see some traits as more  
597 correlated than others. However, these analyses could not exclude the possibility that these  
598 domains represent a higher-level of personality organization, perhaps reflecting group  
599 personalities [cf. 12]. Although there have been reports of higher-order factors of human  
600 personality [e.g., 82], including the so-called “general factor of personality” [e.g., 83], these  
601 reports have been criticized [e.g., 84, 85, 86]. The problems that affect human studies that  
602 purportedly find higher-order personality factors were absent in the present study: each  
603 animal was rated by two or three keepers, the correlations among the latent variables were  
604 considerable, and adjusting for rater effects increased rather than decreased some correlations

605 among factors. Nevertheless, because second-order factors were not identified in other  
606 studies of common marmosets [13, 17, 31, 44], including one that included 77 of the same  
607 animals, prior to interpreting the meaning of this phenomenon, we urge an attempt to  
608 replicate these findings and an analysis of similar data using more flexible modeling  
609 techniques [e.g., 11].

610         The findings from the present study are consistent with the possibility that common  
611 marmosets evolved a personality structure that includes a domain or domains associated with  
612 self-control that are found in larger-brained primate species, such as brown capuchin  
613 monkeys [28], chimpanzees [39], and humans [59]. As these species share only a very distant  
614 common ancestors with Callitrichids, and have very different socioecologies, these traits are  
615 not likely to be homologous. Instead, the presence of traits related to self-control in common  
616 marmosets likely reflects convergent evolution that was driven by the need for individuals to  
617 meet the demands associated with cooperative breeding. Although, it is worth noting that  
618 there is still variability between studies in how these traits group together, studies that  
619 examine the role that factors such as Conscientiousness, Patience, or Impulsivity play in  
620 infant rearing, especially by helpers, among common marmosets are needed to test this  
621 hypothesis.

622         As in our study of a subsample of these subjects [13], we found personality-subjective  
623 well-being correlations that were consistent with those found in studies of humans [45, 46]  
624 and nonhuman primates [40, 47-51]. These findings, and those in humans and great apes that  
625 indicate that a common genetic background underlies these traits [87-92], are consistent with  
626 the possibility that these relationships are ancestral.

627         Our failure to find association between SNPs related to the serotonin 1a receptor gene  
628 and either personality domains is not consistent with previous findings of an association  
629 between this genotype and personality in chimpanzees [54]. It is possible that our failure to

630 find such associations resulted from the personality measure that we used. However, as the  
631 associations between personality and serotonin-related genes in humans are likely false  
632 positives [93], we suspect that we did not find significant associations because there were  
633 none.

634         This study had shortcomings. First, nearly 40% of the subjects were single housed.  
635 Behaviors related to some of the traits might therefore have been rare or absent, and so we  
636 still may not have been capturing enough between subject variation. Second, the factor  
637 structure was compared to studies that used different, although partly overlapping,  
638 instruments. It is unclear to what degree the use of different measures may have obscured  
639 similarities or blurred differences between the structures in these studies. This limitation also  
640 prevented us from using other statistical methods to directly compare these structures. Third,  
641 we judged that it was worth reporting the genetic associations so that they may contribute to  
642 future meta-analyses, as we alluded to previously, to identify genetic effects considerably  
643 larger sample sizes are needed. Fourth, the interrater reliabilities of the subjective well-being  
644 variables were lower than those reported in other nonhuman primate species, for example,  
645 chimpanzees [40, 47].

646         The cliché that a study's findings can yield more questions than answers is well-suited  
647 for the present case. Nevertheless, these findings highlight the need for (and promise of) large  
648 collaborative studies if we are to understand the proximate and ultimate origins of personality  
649 structure in common marmosets, and other species, including ours.

650

651

**Data Availability**

652 Data needed to reproduce the analyses are available via the Open Science Foundation

653 website: <https://osf.io/ysrja/>.

## MARMOSET PERSONALITY

30

Table 1  
*Interrater Reliabilities of Items from the Hominoid Personality Questionnaire*

| Item               | ICC(3,1) | ICC(3,k) |
|--------------------|----------|----------|
| Sociable           | 0.45     | 0.68     |
| Sympathetic        | 0.43     | 0.66     |
| Solitary           | 0.43     | 0.67     |
| Protective         | 0.42     | 0.66     |
| Helpful            | 0.38     | 0.62     |
| Friendly           | 0.36     | 0.60     |
| Aggressive         | 0.34     | 0.57     |
| Gentle             | 0.34     | 0.58     |
| Irritable          | 0.33     | 0.57     |
| Affectionate       | 0.32     | 0.55     |
| Stingy/greedy      | 0.29     | 0.51     |
| Dominant           | 0.28     | 0.50     |
| Individualistic    | 0.28     | 0.51     |
| Submissive         | 0.28     | 0.51     |
| Imitative          | 0.28     | 0.51     |
| Independent        | 0.27     | 0.50     |
| Excitable          | 0.26     | 0.48     |
| Conventional       | 0.26     | 0.48     |
| Bullying           | 0.23     | 0.44     |
| Impulsive          | 0.23     | 0.44     |
| Dependent/follower | 0.23     | 0.44     |
| Defiant            | 0.23     | 0.45     |
| Stable             | 0.21     | 0.41     |
| Jealous            | 0.21     | 0.41     |
| Cautious           | 0.19     | 0.39     |
| Active             | 0.19     | 0.38     |
| Fearful            | 0.18     | 0.37     |
| Autistic           | 0.18     | 0.36     |
| Thoughtless        | 0.17     | 0.36     |
| Erratic            | 0.17     | 0.35     |
| Playful            | 0.16     | 0.33     |
| Intelligent        | 0.16     | 0.33     |
| Reckless           | 0.15     | 0.32     |
| Curious            | 0.14     | 0.30     |
| Sensitive          | 0.14     | 0.30     |
| Inquisitive        | 0.13     | 0.28     |
| Cool               | 0.13     | 0.29     |
| Predictable        | 0.13     | 0.28     |
| Lazy               | 0.11     | 0.25     |
| Timid              | 0.10     | 0.22     |
| Clumsy             | 0.09     | 0.21     |
| Disorganized       | 0.09     | 0.20     |
| Vulnerable         | 0.07     | 0.16     |

## MARMOSET PERSONALITY

31

|              |       |       |
|--------------|-------|-------|
| Unemotional  | 0.06  | 0.15  |
| Distractible | 0.05  | 0.13  |
| Manipulative | 0.05  | 0.12  |
| Depressed    | 0.04  | 0.09  |
| Inventive    | 0.02  | 0.06  |
| Innovative   | 0.00  | 0.01  |
| Decisive     | 0.00  | 0.01  |
| Anxious      | -0.03 | -0.08 |
| Persistent   | -0.06 | -0.19 |
| Quitting     | -0.08 | -0.24 |
| Unperceptive | -0.12 | -0.39 |

---

MARMOSET PERSONALITY

Table 2  
*Pattern Matrix from the First-Order Factor Analysis of the Hominoid Personality Questionnaire*

| Item               | Factor Loadings |              |              |              |             | $h^2$ |
|--------------------|-----------------|--------------|--------------|--------------|-------------|-------|
|                    | Soc             | Dom          | Imp          | Opn          | Neg         |       |
| Helpful            | <b>0.89</b>     | 0.10         | -0.05        | 0.09         | -0.08       | 0.79  |
| Sympathetic        | <b>0.83</b>     | -0.01        | -0.07        | 0.07         | 0.08        | 0.76  |
| Protective         | <b>0.80</b>     | 0.01         | 0.02         | 0.02         | -0.15       | 0.66  |
| Individualistic    | <b>-0.78</b>    | 0.09         | -0.05        | 0.13         | 0.25        | 0.71  |
| Dependent/follower | <b>0.77</b>     | 0.06         | -0.05        | 0.23         | 0.39        | 0.69  |
| Independent        | <b>-0.73</b>    | 0.27         | -0.31        | 0.10         | 0.08        | 0.62  |
| Imitative          | <b>0.72</b>     | 0.04         | 0.07         | 0.20         | 0.18        | 0.49  |
| Solitary           | <b>-0.71</b>    | 0.05         | -0.04        | -0.17        | 0.34        | 0.74  |
| Affectionate       | <b>0.64</b>     | -0.09        | -0.16        | 0.21         | 0.12        | 0.65  |
| Sensitive          | <b>0.64</b>     | -0.08        | -0.17        | -0.02        | 0.04        | 0.61  |
| Sociable           | <b>0.62</b>     | -0.27        | -0.16        | 0.16         | -0.15       | 0.85  |
| Conventional       | <b>0.60</b>     | 0.11         | -0.33        | -0.13        | 0.19        | 0.62  |
| Intelligent        | <b>0.59</b>     | 0.26         | -0.18        | 0.00         | -0.19       | 0.39  |
| Gentle             | <b>0.50</b>     | -0.35        | -0.24        | 0.15         | 0.09        | 0.83  |
| Reckless           | <b>-0.50</b>    | -0.16        | 0.39         | 0.38         | -0.03       | 0.62  |
| Friendly           | <b>0.49</b>     | <b>-0.46</b> | -0.15        | 0.13         | 0.02        | 0.86  |
| Jealous            | 0.02            | <b>0.92</b>  | -0.04        | 0.21         | 0.15        | 0.83  |
| Stingy/greedy      | -0.08           | <b>0.87</b>  | -0.06        | 0.28         | 0.15        | 0.86  |
| Bullying           | -0.04           | <b>0.85</b>  | 0.00         | 0.11         | 0.07        | 0.77  |
| Dominant           | -0.09           | <b>0.79</b>  | 0.06         | 0.01         | -0.07       | 0.80  |
| Manipulative       | 0.21            | <b>0.72</b>  | -0.10        | 0.04         | -0.33       | 0.57  |
| Aggressive         | -0.12           | <b>0.69</b>  | 0.15         | -0.05        | -0.17       | 0.80  |
| Defiant            | -0.09           | <b>0.65</b>  | 0.20         | -0.01        | -0.20       | 0.78  |
| Irritable          | 0.00            | <b>0.50</b>  | <b>0.48</b>  | -0.18        | -0.11       | 0.74  |
| Excitable          | -0.02           | 0.16         | <b>0.78</b>  | -0.08        | -0.06       | 0.78  |
| Unemotional        | -0.10           | 0.15         | <b>-0.77</b> | 0.00         | 0.26        | 0.52  |
| Impulsive          | -0.10           | 0.06         | <b>0.75</b>  | 0.13         | 0.13        | 0.76  |
| Cool               | 0.18            | -0.05        | <b>-0.66</b> | -0.06        | 0.01        | 0.65  |
| Fearful            | 0.23            | -0.10        | <b>0.62</b>  | <b>-0.42</b> | 0.28        | 0.51  |
| Distractible       | -0.11           | -0.05        | <b>0.53</b>  | 0.23         | 0.10        | 0.40  |
| Disorganized       | -0.10           | 0.15         | <b>0.52</b>  | 0.18         | 0.12        | 0.51  |
| Stable             | 0.21            | -0.19        | <b>-0.46</b> | 0.07         | -0.38       | 0.64  |
| Thoughtless        | -0.22           | -0.03        | <b>0.41</b>  | 0.38         | 0.02        | 0.45  |
| Predictable        | 0.12            | -0.08        | <b>-0.40</b> | 0.04         | 0.02        | 0.27  |
| Erratic            | -0.20           | 0.32         | 0.35         | -0.06        | 0.20        | 0.54  |
| Curious            | 0.14            | 0.13         | 0.08         | <b>0.73</b>  | 0.02        | 0.61  |
| Inquisitive        | 0.17            | 0.11         | 0.06         | <b>0.72</b>  | 0.09        | 0.55  |
| Inventive          | 0.27            | 0.18         | -0.05        | <b>0.68</b>  | 0.11        | 0.51  |
| Playful            | 0.23            | -0.12        | 0.32         | <b>0.65</b>  | -0.04       | 0.60  |
| Cautious           | <b>0.47</b>     | 0.08         | 0.24         | <b>-0.59</b> | 0.21        | 0.53  |
| Active             | 0.28            | 0.18         | <b>0.41</b>  | <b>0.52</b>  | -0.13       | 0.69  |
| Autistic           | 0.03            | -0.13        | 0.09         | 0.19         | <b>0.68</b> | 0.45  |



MARMOSET PERSONALITY

33

|                        |       |       |              |       |             |      |
|------------------------|-------|-------|--------------|-------|-------------|------|
| Timid                  | 0.14  | 0.00  | 0.34         | -0.18 | <b>0.65</b> | 0.58 |
| Depressed              | -0.17 | 0.07  | -0.27        | -0.04 | <b>0.64</b> | 0.51 |
| Clumsy                 | -0.04 | 0.17  | -0.05        | 0.00  | <b>0.58</b> | 0.33 |
| Vulnerable             | -0.02 | -0.19 | -0.02        | 0.04  | <b>0.57</b> | 0.39 |
| Lazy                   | -0.23 | -0.05 | <b>-0.45</b> | -0.17 | <b>0.50</b> | 0.59 |
| Submissive             | 0.33  | -0.20 | -0.18        | -0.01 | <b>0.48</b> | 0.61 |
| Proportion of variance | 0.20  | 0.14  | 0.13         | 0.08  | 0.08        |      |

| Factor | Factor Correlations |       |       |       |      |
|--------|---------------------|-------|-------|-------|------|
|        | Soc                 | Dom   | Imp   | Opn   | Neg  |
| Soc    | 1.00                |       |       |       |      |
| Dom    | -0.53               | 1.00  |       |       |      |
| Imp    | -0.45               | 0.57  | 1.00  |       |      |
| Opn    | 0.06                | 0.15  | 0.18  | 1.00  |      |
| Neg    | -0.06               | -0.19 | -0.04 | -0.38 | 1.00 |

*Note.*  $N = 128$ . Soc = Sociability, Dom = Dominance, Imp = Impulsiveness, Opn = Openness, Neg = Negative Affect,  $h^2$  = communalities. Factors extracted using a maximum likelihood estimation and rotated using the promax procedure. Factor loadings greater than or equal to  $|0.4|$  are in bold.

Table 3

*Pattern Matrix from the Second-Order Factor Analysis of Personality Factors*

| First-Order Factor     | Promax Rotation |              | Varimax Rotation |              | $h^2$ |
|------------------------|-----------------|--------------|------------------|--------------|-------|
|                        | Pro-sociality   | Boldness     | Pro-sociality    | Boldness     |       |
| Dominance              | <b>-0.79</b>    | 0.15         | <b>-0.80</b>     | 0.21         | 0.68  |
| Sociability            | <b>0.72</b>     | 0.21         | <b>0.70</b>      | 0.15         | 0.51  |
| Impulsiveness          | <b>-0.67</b>    | 0.08         | <b>-0.68</b>     | 0.13         | 0.48  |
| Negative affect        | -0.01           | <b>0.62</b>  | 0.04             | <b>-0.61</b> | 0.38  |
| Openness               | -0.01           | <b>-0.61</b> | -0.06            | <b>0.61</b>  | 0.38  |
| Proportion of variance | 0.32            | 0.17         | 0.32             | 0.17         |       |

*Note.*  $N = 128$ .  $h^2$  = communalities. Factors extracted from the factor correlation matrix from Table 2 using a maximum likelihood estimation and rotated using the promax and varimax procedures. The Pro-Social factor for both structures were reflected, that is, the loadings were multiplied by -1. The promax-rotated factors correlated -0.15. Factor loadings greater than or equal to |0.4| are in bold.

Table 4  
*Results from Factor Analysis of the Subjective Well-Being Scale*

| Item                              | Loading | $h^2$ |
|-----------------------------------|---------|-------|
| Be marmoset                       | 0.98    | 0.97  |
| Balance of moods                  | 0.86    | 0.73  |
| Ability to achieve goals          | 0.82    | 0.67  |
| Pleasure from social interactions | 0.55    | 0.30  |

*Note.*  $N = 128$ .  $h^2 =$  communalities.

Table 5  
*Correlations Between Unit-Weighted Factor Scores Based on Factor Loadings in the Present Study and Factor Loadings from Three Previous Studies of Common Marmoset Personality*

|                            | <i>r</i>     | 95% Confidence Interval |              |
|----------------------------|--------------|-------------------------|--------------|
|                            |              | Lower Bound             | Upper Bound  |
| Iwanicki and Lehman (2015) |              |                         |              |
| Extraversion               |              |                         |              |
| Sociability                | -0.50        | -0.62                   | -0.36        |
| Dominance                  | <b>0.82</b>  | <b>0.75</b>             | <b>0.87</b>  |
| Impulsiveness              | 0.50         | 0.36                    | 0.62         |
| Openness                   | 0.54         | 0.40                    | 0.65         |
| Negative affect            | <b>-0.70</b> | <b>-0.78</b>            | <b>-0.60</b> |
| Agreeableness              |              |                         |              |
| Sociability                | <b>0.86</b>  | <b>0.81</b>             | <b>0.90</b>  |
| Dominance                  | <b>-0.84</b> | <b>-0.88</b>            | <b>-0.77</b> |
| Impulsiveness              | -0.76        | -0.82                   | -0.67        |
| Openness                   | -0.07        | -0.24                   | 0.11         |
| Negative affect            | 0.25         | 0.08                    | 0.41         |
| Conscientiousness          |              |                         |              |
| Sociability                | <b>0.83</b>  | <b>0.77</b>             | <b>0.88</b>  |
| Dominance                  | -0.47        | -0.59                   | -0.32        |
| Impulsiveness              | -0.63        | -0.73                   | -0.51        |
| Openness                   | 0.00         | -0.17                   | 0.18         |
| Negative affect            | 0.05         | -0.13                   | 0.22         |
| Openness                   |              |                         |              |
| Sociability                | 0.11         | -0.07                   | 0.28         |
| Dominance                  | 0.34         | 0.18                    | 0.49         |
| Impulsiveness              | 0.27         | 0.10                    | 0.42         |
| Openness                   | <b>0.96</b>  | <b>0.94</b>             | <b>0.97</b>  |
| Negative affect            | -0.40        | -0.53                   | -0.24        |
| Koski et al. (2017)        |              |                         |              |
| Conscientiousness          |              |                         |              |
| Sociability                | 0.62         | 0.51                    | 0.72         |
| Dominance                  | <b>-0.89</b> | <b>-0.92</b>            | <b>-0.84</b> |
| Impulsiveness              | <b>-0.84</b> | <b>-0.89</b>            | <b>-0.79</b> |
| Openness                   | -0.39        | -0.53                   | -0.23        |
| Negative affect            | 0.19         | 0.01                    | 0.35         |
| Agreeableness              |              |                         |              |
| Sociability                | <b>0.95</b>  | <b>0.92</b>             | <b>0.96</b>  |
| Dominance                  | -0.68        | -0.77                   | -0.58        |
| Impulsiveness              | -0.72        | -0.79                   | -0.62        |
| Openness                   | 0.03         | -0.14                   | 0.20         |
| Negative affect            | 0.13         | -0.05                   | 0.29         |
| Assertiveness              |              |                         |              |

|                              |                 |              |              |              |
|------------------------------|-----------------|--------------|--------------|--------------|
|                              | Sociability     | <b>-0.67</b> | <b>-0.76</b> | <b>-0.57</b> |
|                              | Dominance       | <b>0.67</b>  | <b>0.57</b>  | <b>0.76</b>  |
|                              | Impulsiveness   | 0.33         | 0.16         | 0.47         |
|                              | Openness        | 0.32         | 0.15         | 0.47         |
|                              | Negative affect | <b>-0.64</b> | <b>-0.73</b> | <b>-0.53</b> |
| Patience                     |                 |              |              |              |
|                              | Sociability     | <b>0.74</b>  | <b>0.65</b>  | <b>0.81</b>  |
|                              | Dominance       | -0.37        | -0.51        | -0.21        |
|                              | Impulsiveness   | -0.59        | -0.69        | -0.47        |
|                              | Openness        | 0.21         | 0.04         | 0.37         |
|                              | Negative affect | -0.03        | -0.21        | 0.14         |
| Inquisitiveness              |                 |              |              |              |
|                              | Sociability     | 0.34         | 0.18         | 0.48         |
|                              | Dominance       | 0.21         | 0.04         | 0.37         |
|                              | Impulsiveness   | 0.17         | -0.01        | 0.33         |
|                              | Openness        | <b>0.82</b>  | <b>0.76</b>  | <b>0.87</b>  |
|                              | Negative affect | -0.56        | -0.67        | -0.43        |
| Inoue-Murayama et al. (2018) |                 |              |              |              |
| Dominance                    |                 |              |              |              |
|                              | Sociability     | -0.71        | -0.79        | -0.62        |
|                              | Dominance       | <b>0.94</b>  | <b>0.91</b>  | <b>0.96</b>  |
|                              | Impulsiveness   | 0.83         | 0.77         | 0.88         |
|                              | Openness        | 0.34         | 0.18         | 0.49         |
|                              | Negative affect | -0.38        | -0.52        | -0.22        |
| Sociability                  |                 |              |              |              |
|                              | Sociability     | <b>0.93</b>  | <b>0.90</b>  | <b>0.95</b>  |
|                              | Dominance       | -0.40        | -0.54        | -0.25        |
|                              | Impulsiveness   | -0.39        | -0.52        | -0.23        |
|                              | Openness        | 0.40         | 0.24         | 0.54         |
|                              | Negative affect | -0.12        | -0.29        | 0.05         |
| Neuroticism                  |                 |              |              |              |
|                              | Sociability     | -0.30        | -0.45        | -0.14        |
|                              | Dominance       | -0.03        | -0.20        | 0.14         |
|                              | Impulsiveness   | 0.35         | 0.19         | 0.49         |
|                              | Openness        | -0.34        | -0.49        | -0.18        |
|                              | Negative affect | <b>0.82</b>  | <b>0.75</b>  | <b>0.87</b>  |

*Note.*  $N = 128$ . The highest correlation between the five factors found in this study and each factor found in a previous study are highlighted in bold. In cases where the confidence intervals of two or more of the highest correlations overlapped, we highlighted both correlations.

Table 6

*Correlations Between Unit-Weighted Factor Scores Based on Loadings from the Second-Order Factor Analysis in the Present Study and Factor Loadings from Three Previous Studies of Common Marmoset Personality*

|                              | <i>r</i>     | 95% Confidence Interval |              |
|------------------------------|--------------|-------------------------|--------------|
|                              |              | Lower Bound             | Upper Bound  |
| Iwanicki and Lehman (2015)   |              |                         |              |
| Extraversion                 |              |                         |              |
| Pro-sociality                | <b>-0.72</b> | <b>-0.80</b>            | <b>-0.63</b> |
| Boldness                     | <b>0.73</b>  | <b>0.64</b>             | <b>0.80</b>  |
| Agreeableness                |              |                         |              |
| Pro-sociality                | <b>0.95</b>  | <b>0.93</b>             | <b>0.97</b>  |
| Boldness                     | -0.18        | -0.35                   | -0.01        |
| Conscientiousness            |              |                         |              |
| Pro-sociality                | <b>0.73</b>  | <b>0.64</b>             | <b>0.81</b>  |
| Boldness                     | -0.02        | -0.20                   | 0.15         |
| Openness                     |              |                         |              |
| Pro-sociality                | -0.20        | -0.36                   | -0.03        |
| Boldness                     | <b>0.83</b>  | <b>0.76</b>             | <b>0.87</b>  |
| Koski et al. (2017)          |              |                         |              |
| Conscientiousness            |              |                         |              |
| Pro-sociality                | <b>0.91</b>  | <b>0.88</b>             | <b>0.94</b>  |
| Boldness                     | -0.35        | -0.49                   | -0.19        |
| Agreeableness                |              |                         |              |
| Pro-sociality                | <b>0.90</b>  | <b>0.87</b>             | <b>0.93</b>  |
| Boldness                     | -0.05        | -0.22                   | 0.12         |
| Assertiveness                |              |                         |              |
| Pro-sociality                | <b>-0.67</b> | <b>-0.76</b>            | <b>-0.56</b> |
| Boldness                     | <b>0.56</b>  | <b>0.43</b>             | <b>0.67</b>  |
| Patience                     |              |                         |              |
| Pro-sociality                | <b>0.64</b>  | <b>0.53</b>             | <b>0.73</b>  |
| Boldness                     | 0.15         | -0.02                   | 0.32         |
| Inquisitiveness              |              |                         |              |
| Pro-sociality                | -0.02        | -0.19                   | 0.16         |
| Boldness                     | <b>0.84</b>  | <b>0.78</b>             | <b>0.88</b>  |
| Inoue-Murayama et al. (2018) |              |                         |              |
| Dominance                    |              |                         |              |
| Pro-sociality                | <b>-0.97</b> | <b>-0.98</b>            | <b>-0.95</b> |
| Boldness                     | 0.43         | 0.28                    | 0.56         |
| Sociability                  |              |                         |              |
| Pro-sociality                | <b>0.66</b>  | <b>0.55</b>             | <b>0.75</b>  |
| Boldness                     | 0.32         | 0.16                    | 0.47         |
| Neuroticism                  |              |                         |              |
| Pro-sociality                | -0.21        | -0.37                   | -0.04        |
| Boldness                     | <b>-0.68</b> | <b>-0.76</b>            | <b>-0.57</b> |

*Note.*  $N = 128$ . The highest correlation between the five factors found in this study and each factor found in a previous study are highlighted in bold. In cases where the confidence intervals of two or more of the highest correlations overlapped, we highlighted both correlations.

Table 7  
*Correlations Between Subjective Well-Being Scale Items and Factor and Personality Factors*

|                              | <i>r</i>     | 95% Confidence Interval |              |
|------------------------------|--------------|-------------------------|--------------|
|                              |              | Lower Bound             | Upper Bound  |
| <b>Moods</b>                 |              |                         |              |
| Sociability                  | <b>0.42</b>  | <b>0.26</b>             | <b>0.55</b>  |
| Dominance                    | -0.18        | -0.34                   | < -0.01      |
| Impulsiveness                | <b>-0.27</b> | <b>-0.43</b>            | <b>-0.11</b> |
| Openness                     | <b>0.38</b>  | <b>0.22</b>             | <b>0.52</b>  |
| Negative affect              | -0.14        | -0.30                   | 0.04         |
| Pro-sociality                | <b>0.33</b>  | <b>0.16</b>             | <b>0.48</b>  |
| Boldness                     | <b>0.31</b>  | <b>0.15</b>             | <b>0.46</b>  |
| <b>Social</b>                |              |                         |              |
| Sociability                  | <b>0.53</b>  | <b>0.40</b>             | <b>0.65</b>  |
| Dominance                    | -0.22        | -0.38                   | -0.05        |
| Impulsiveness                | -0.24        | -0.40                   | -0.07        |
| Openness                     | 0.14         | -0.03                   | 0.31         |
| Negative affect              | -0.11        | -0.27                   | 0.07         |
| Pro-sociality                | <b>0.38</b>  | <b>0.22</b>             | <b>0.52</b>  |
| Boldness                     | 0.15         | -0.03                   | 0.31         |
| <b>Goals</b>                 |              |                         |              |
| Sociability                  | <b>0.39</b>  | <b>0.24</b>             | <b>0.53</b>  |
| Dominance                    | -0.08        | -0.25                   | 0.10         |
| Impulsiveness                | -0.22        | -0.38                   | -0.05        |
| Openness                     | 0.25         | 0.08                    | 0.40         |
| Negative affect              | -0.22        | -0.38                   | -0.05        |
| Pro-sociality                | 0.26         | 0.09                    | 0.41         |
| Boldness                     | <b>0.28</b>  | <b>0.11</b>             | <b>0.43</b>  |
| <b>Be marmoset</b>           |              |                         |              |
| Sociability                  | <b>0.45</b>  | <b>0.30</b>             | <b>0.58</b>  |
| Dominance                    | -0.18        | -0.34                   | < -0.01      |
| Impulsiveness                | <b>-0.28</b> | <b>-0.43</b>            | <b>-0.11</b> |
| Openness                     | <b>0.33</b>  | <b>0.16</b>             | <b>0.48</b>  |
| Negative affect              | <b>-0.27</b> | <b>-0.42</b>            | <b>-0.10</b> |
| Pro-sociality                | <b>0.34</b>  | <b>0.18</b>             | <b>0.49</b>  |
| Boldness                     | <b>0.36</b>  | <b>0.20</b>             | <b>0.50</b>  |
| <b>Subjective well-being</b> |              |                         |              |
| Sociability                  | <b>0.53</b>  | <b>0.39</b>             | <b>0.65</b>  |
| Dominance                    | -0.19        | -0.36                   | -0.02        |
| Impulsiveness                | <b>-0.30</b> | <b>-0.45</b>            | <b>-0.13</b> |
| Openness                     | <b>0.32</b>  | <b>0.15</b>             | <b>0.47</b>  |
| Negative affect              | -0.21        | -0.37                   | -0.04        |
| Pro-sociality                | <b>0.39</b>  | <b>0.23</b>             | <b>0.53</b>  |
| Boldness                     | <b>0.32</b>  | <b>0.16</b>             | <b>0.47</b>  |

*Note.*  $N = 128$ . Estimates in bold are significant at  $P < 0.05$  after adjustment using Holm's method. 95% confidence intervals are based on the nominal (unadjusted) significance level.



**Figure 1**

Personality domains found in previous studies and grouped by the psychological construct they represent. From left to right, the first two columns are domains found by Iwanicki and Lehmann (2015) in two datasets, the third refers to domains found by Koski et al. (2017), the fourth to domains found by Inoue-Murayama et al. (2018), and the fourth refers to domains found by Yokoyama et al. (2011). Domains in the same ‘box’ measure the same construct. Constructs separated by dotted lines are related constructs.

|                        |                   |                   |             |                |
|------------------------|-------------------|-------------------|-------------|----------------|
| Agreeableness          | Agreeableness     | Agreeableness     | Sociability | Sociability    |
|                        | Extraversion      | Assertiveness     | Dominance   | Aggressiveness |
| Neuroticism            |                   |                   | Neuroticism | Social Anxiety |
| Perceptual Sensitivity | Conscientiousness | Conscientiousness |             |                |
|                        | Patience          |                   |             |                |
|                        | Openness          | Inquisitiveness   |             |                |

## Figure 2

The sequence is based on NC\_013897. Primer sequences are underlined. Start and stop codon sequences are in boxes. The third intracellular region is enclosed in the parentheses.

Nucleotide substitutions are shown in capital and bold letters; G840C (A280A), G841A (V281M), T901A (S301T).

```
tggattcccttcctccgaaacttccttggagactgggcggaagaccccaggggaagggcgaaagggga  
tcttcgctctgctttttcttccttcctcttccccgcgcggggctcacaggc[atg]gatgtgctcagccc  
tggtcagggcaacaataaccacatcatccccgggtccctttgagaccgccagcaacactactggtatct  
ccgacgtgaccttcggctaccaagtgatcacctctctgctgttgggcacgctcatctctgtgcggtg  
ctgggcaatgcctgcgtggtggctgccatcgccctggagcgctccctgcagaacgtggccaattatct  
tattggctctttggcggtcaccgacctcatggtgtcggtgttgggtgctgcccatggccgcgctgtatc  
aggtgctcaacaagtggactctgggccaggtcacctgcgacctgttcatagccctcgacgtgctgtgc  
tgtacctcatccatcctgcacctgtgcgccatcgcgctggacaggtactgggccatcacggaccccat  
cgactacgtgaacaagaggacgccccggcgcgctgctgcgctcatctcgctcacttggcttattggct  
tcctcatctccatccccgccatgctgggctggcgcaccccgggaagaccgctcggaccccgacgcatgc  
accattagcaaggaccacggctacactatctactccaccttcggcgctttctacatcccgctgctgct  
catgctggttctctatgggcgcatat[ctccgagctgcgcgcttccgcattcgcaagacagtgaaaagg  
tggagaagaccggagcggacacccgccgtggagcatctccggccccgcagcccaagaagagcgtgaat  
ggagaatcggggagcaggaactggagactgagcgtggagagcaagtacagagagtgctctgtgcgccaa  
tggcgcGGtaggcaaggtgacgacggcgccgcctggaggtgatcgaggtgcaccgggtgggcaacT  
ccaaagagcacttgctctgcccagcagggctggtgctacccttgtgccccgcctcttctgagagg  
aaaaatgagcgcaacgcgcgagggcgaagcgcaagatggccctggcccgagagaggaagacagtgaagac  
g]ctgggcatatcatgggtactttcatcctctgctggctgcccttcttcatcgtggctcttgttctgc  
cttctgtgagagcagttgccacatgccaccctgttgggcgctataatcaattggctgggctactcc  
aactctctgcttaaccccgctcatttacgcatacttcaacaaggactttcaaacgcgttaagaagat  
ctttaagtgaagtctgcccgaat[ga]tgatggaggagtacccggccagtgccgggggttacaggatc  
cgccccattcactatgcttggaccaaccctaggggaatcaacacct
```

**Figure 3**

Locations of the single nucleotide polymorphisms on the single exon of the common marmoset serotonin receptor 1a gene

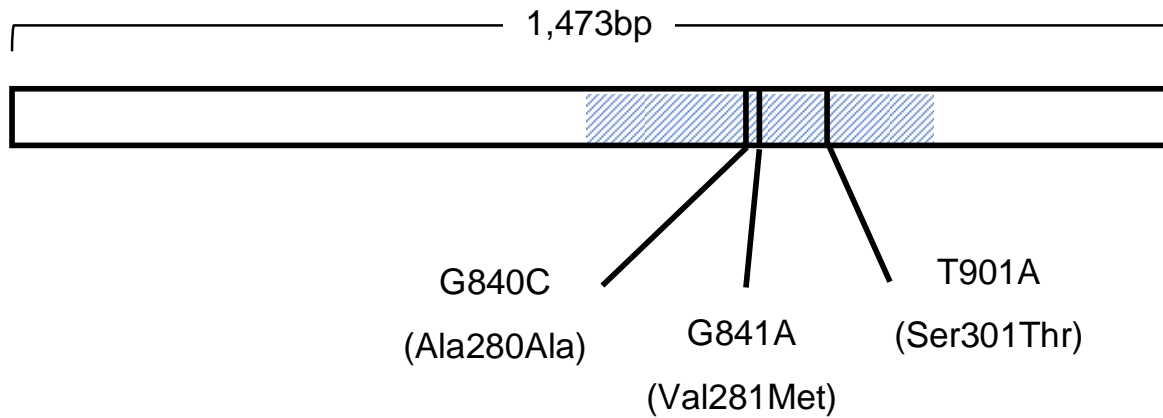

*Note.* The shaded region corresponds to the third intracellular region.

## References

1. Rylands AB, Coimbra-Filho AF, Mittermeier RA. Systematics, geographic distribution, and some notes on the conservation status of the Callitrichidae. In: Rylands AB, editor. *Marmosets and tamarins: Systematics, behaviour, and ecology*. New York: Oxford University Press; 1993. p. 11–77.
2. Rylands AB, de Faria DS. Habitats, feeding ecology, and home range size in the genus *Callithrix*. In: Rylands AB, editor. *Marmosets and tamarins: Systematics, behaviour, and ecology*. New York: Oxford University Press; 1993. p. 262-72.
3. Servick K. Why are U.S. neuroscientists clamoring for marmosets? *Science*. 2018;383-4.
4. Preuss TM. Critique of pure marmoset. *Brain Behav Evol*. 2019;93(2-3):92-107. doi: 10.1159/000500500.
5. Burkart JM, Fehr E, Efferson C, van Schaik CP. Other-regarding preferences in a non-human primate: Common marmosets provision food altruistically. *Proc Natl Acad Sci U S A*. 2007;104(50):19762-6. doi: 10.1073/pnas.0710310104.
6. Burkart JM, Allon O, Amici F, Fichtel C, Finkenwirth C, Heschl A, et al. The evolutionary origin of human hyper-cooperation. *Nature Communications*. 2014;5. doi: 10.1038/ncomms5747.
7. Kawai N, Yasue M, Banno T, Ichinohe N. Marmoset monkeys evaluate third-party reciprocity. *Biology Letters*. 2014;10(5). doi: 10.1098/rsbl.2014.0058.
8. Burkart JM, van Schaick CP. Cognitive consequences of cooperative breeding in primates? *Anim Cogn*. 2010;13:1-19. doi: 10.1007/s10071-009-0263-7.
9. Digby LJ, Ferrari SF, Saltzman W. Callitrichines: The role of competition in cooperatively breeding species. In: Campbell CJ, Fuentes A, MacKinnon KC, Bearder SK,

Stumpf RM, editors. *Primates in Perspective*. 2nd ed. Oxford: Oxford University Press; 2010. p. 91-107.

10. Šlipogor V, Gunhold-de Oliveira T, Tadić Z, Massen JJM, Bugnyar T. Consistent inter-individual differences in common marmosets (*Callithrix jacchus*) in Boldness-Shyness, Stress-Activity, and Exploration-Avoidance. *Am J Primatol*. 2016;78(9):961-73. doi: 10.1002/ajp.22566.

11. Martin JS, Massen JJM, Šlipogor V, Bugnyar T, Jaeggi AV, Koski SE. The EGA+GNM framework: An integrative approach to modelling behavioural syndromes. *Methods in Ecology and Evolution*. 2019;10(2):245-57. doi: 10.1111/2041-210x.13100.

12. Koski SE, Burkart JM. Common marmosets show social plasticity and group-level similarity in personality. *Scientific Reports*. 2015;5. doi: 10.1038/srep08878.

13. Inoue-Murayama M, Yokoyama C, Yamanashi Y, Weiss A. Common marmoset (*Callithrix jacchus*) personality, subjective well-being, hair cortisol level, and *AVPR1a*, *OPRM1*, and *DAT* genotypes. *Scientific Reports*. 2018. doi: 10.1038/s41598-018-28112-7.

14. Tomassetti D, Caracciolo S, Manciocco A, Chiarotti F, Vitale A, De Filippis B. Personality and lateralization in common marmosets (*Callithrix jacchus*). *Behavioural Processes*. 2019;167. doi: 10.1016/j.beproc.2019.103899.

15. Yokoyama C, Kawasaki A, Hayashi T, Onoe H. Linkage between the midline cortical serotonergic system and social behavior traits: positron emission tomography studies of common marmosets. *Cereb Cortex*. 2013;23:2136-45. doi: 10.1093/cercor/bhs196.

16. Šlipogor V, Burkart JM, Martin JS, Bugnyar T, Koski SE. Personality method validation in common marmosets (*Callithrix jacchus*): Getting the best of both worlds. *J Comp Psychol*. 2020;134(1):52-70. doi: 10.1037/com0000188.

17. Iwanicki S, Lehmann J. Behavioral and trait rating assessments of personality in common marmosets (*Callithrix jacchus*). *J Comp Psychol*. 2015;129(3):205-17. doi: 10.1037/a0039318.
18. Gosling SD, Graybeal A. Tree thinking: A new paradigm for integrating comparative data in psychology. *J Gen Psychol*. 2007;134:259-77. doi: 10.3200/GENP.134.2.259-278.
19. Harvey PH, Pagel MD. *The comparative method in evolutionary biology*. Oxford, England: Oxford University Press; 1991.
20. Gorsuch RL. *Factor analysis*. 2nd ed. Hillsdale, NJ: Lawrence Erlbaum Associates; 1983.
21. Araya-Ajoy YG, Dingemanse NJ. Characterizing behavioural 'characters': an evolutionary framework. *P R Soc B*. 2014;281(1776). doi: 10.1098/Rspb.2013.2645.
22. McCrae RR, John OP. An introduction to the Five-Factor Model and its applications. *J Pers*. 1992;60:175-215. doi: 10.1111/j.1467-6494.1992.tb00970.x.
23. Digman JM. Personality structure: Emergence of the Five-Factor Model. *Annu Rev Psychol*. 1990;41:417-40. doi: 10.1146/annurev.ps.41.020190.002221.
24. Adams MJ, Majolo B, Ostner J, Schuelke O, De Marco A, Thierry B, et al. Personality structure and social style in macaques. *J Pers Soc Psychol*. 2015;109(2):338-53. doi: 10.1037/pspp0000041.
25. Weiss A, Staes N, Pereboom JJM, Inoue-Murayama M, Stevens JMG, Eens M. Personality in bonobos. *Psychol Sci*. 2015;26(9):1430-9. doi: 10.1177/0956797615589933.
26. Wilson VAD, Inoue-Murayama M, Weiss A. A comparison of personality in the common and bolivian squirrel monkey (*Saimiri sciureus* and *Saimiri boliviensis*). *J Comp Psychol*. 2018;132(1):24-39. doi: 10.1037/com0000093.

27. Robinson LM, Morton FB, Gartner MC, Widness J, Paukner A, Essler JL, et al. Divergent personality structures of brown and white-faced capuchins. *J Comp Psychol.* 2016;130(4):305-12. doi: 10.1037/com0000037.
28. Morton FB, Lee PC, Buchanan-Smith HM, Brosnan SF, Thierry B, Paukner A, et al. Personality structure in brown capuchin monkeys (*Sapajus apella*): Comparisons with chimpanzees (*Pan troglodytes*), orangutans (*Pongo spp.*), and rhesus macaques (*Macaca mulatta*). *J Comp Psychol.* 2013;127:282-98. doi: 10.1037/a0031723.
29. Fernández-Bolaños M, Delval I, de Oliveira RS, Izar P. Assessing the personality structure of wild capuchin monkeys (*Sapajus xanthosternos*) using trait rating and behavioral coding. *J Comp Psychol.* 2020;134(3):349-60. doi: 10.1037/com0000219.
30. Masilkova M, Šlipogor V, Weiss A, Konečná M. Comparative assessment of behaviorally derived personality structures in golden-handed tamarins (*Saguinus midas*), cotton-top tamarins (*Saguinus oedipus*), and common marmosets (*Callithrix jacchus*). *J Comp Psychol.* 2020; Advance online publication. doi: 10.1037/com0000226.
31. Koski SE, Buchanan-Smith H, Ash H, Burkart J, Bugnyar T, Weiss A. Common marmoset (*Callithrix jacchus*) personality. *J Comp Psychol.* 2017;131(4):326-36. doi: 10.1037/com0000089.
32. Yokoyama C, Onoe H. Molecular brain imaging of personality traits in nonhuman primates: A study of the common marmoset. In: Inoue-Murayama M, Kawamura S, Weiss A, editors. *From Genes to Animal Behavior: Social Structures, Personalities, Communication by Color*. Tokyo: Springer Japan; 2011. p. 389-406.
33. Weiss A. Personality traits: A view from the animal kingdom. *J Pers.* 2017. doi: 10.1111/jopy.12310.

34. Delgado MM, Sulloway FJ. Attributes of conscientiousness throughout the animal kingdom: An empirical and evolutionary overview. *Psychol Bull.* 2017;143(8):823-67. doi: 10.1037/bul0000107.
35. MacLean EL, Hare B, Nunn CL, Addessi E, Amici F, Anderson RC, et al. The evolution of self-control. *Proc Natl Acad Sci U S A.* 2014;111(20):E2140-E8. doi: 10.1073/pnas.1323533111.
36. McCrae RR, Terracciano A, 78 Members of the Personality Profiles of Cultures Project. Universal features of personality traits from the observer's perspective: Data from 50 cultures. *J Pers Soc Psychol.* 2005;88(3):547-61. doi: 10.1037/0022-3514.88.3.547. PubMed PMID: ISI:000227310400009.
37. Weiss A, King JE, Hopkins WD. A cross-setting study of chimpanzee (*Pan troglodytes*) personality structure and development: Zoological parks and Yerkes National Primate Research Center. *American Journal of Primatology.* 2007;69(11):1264-77. doi: 10.1002/ajp.20428.
38. King JE, Weiss A, Farmer KH. A chimpanzee (*Pan troglodytes*) analogue of cross-national generalization of personality structure: Zoological parks and an African sanctuary. *Journal of Personality.* 2005;73(2):389-410. doi: 10.1111/j.1467-6494.2005.00313.x.
39. King JE, Figueredo AJ. The Five-Factor Model plus Dominance in chimpanzee personality. *J Res Pers.* 1997;31(2):257-71. doi: 10.1006/jrpe.1997.2179.
40. Weiss A, Inoue-Murayama M, Hong K-W, Inoue E, Usono S, Ochiai T, et al. Assessing chimpanzee personality and subjective well-being in Japan. *American Journal of Primatology.* 2009;71(4):283-92. doi: 10.1002/ajp.20649.
41. Freeman HD, Brosnan SF, Hopper LM, Lambeth SP, Schapiro SJ, Gosling SD. Developing a comprehensive and comparative questionnaire for measuring personality in



chimpanzees using a simultaneous top-down/bottom-up design. *Am J Primatol.*

2013;75(10):1042-53. doi: 10.1002/ajp.22168.

42. Dutton DM. Subjective assessment of chimpanzee (*Pan troglodytes*) personality:

Reliability and stability of trait ratings. *Primates.* 2008;49(4):253-9. doi: 10.1007/s10329-008-0094-1.

43. Shrout PE, Fleiss JL. Intraclass correlations: Uses in assessing rater reliability.

*Psychol Bull.* 1979;86(2):420-8. doi: 10.1037/0033-2909.86.2.420.

44. Šlipogor V, Massen JJM, Schiel N, Souto A, Bugnyar T. Temporal consistency and ecological validity of personality structure in common marmosets (*Callithrix jacchus*): A unifying field and laboratory approach. *Am J Primatol.* 2021;83(2). doi: 10.1002/ajp.23229.

45. DeNeve KM, Cooper H. The happy personality: A meta-analysis of 137 personality traits and subjective well-being. *Psychological Bulletin.* 1998;124(2):197-229. doi:

10.1037/0033-2909.124.2.197.

46. Steel P, Schmidt J, Shultz J. Refining the relationship between personality and subjective well-being. *Psychol Bull.* 2008;134(1):138-61. doi: 10.1037/0033-2909.134.1.138.

47. King JE, Landau VI. Can chimpanzee (*Pan troglodytes*) happiness be estimated by human raters? *Journal of Research in Personality.* 2003;37(1):1-15. doi: 10.1016/S0092-6566(02)00527-5.

48. Robinson LM, Altschul D, Wallace E, Úbeda Y, Llorente M, Machanda Z, et al. Chimpanzees with positive welfare are happier, extraverted, and emotionally stable. *Appl Anim Behav Sci.* 2017;191:90-7. doi: 10.1016/j.applanim.2017.02.008.

49. Weiss A, King JE, Perkins L. Personality and subjective well-being in orangutans (*Pongo pygmaeus* and *Pongo abelii*). *J Pers Soc Psychol.* 2006;90(3):501-11. doi:

10.1037/0022-3514.90.3.501.

50. Weiss A, Adams MJ, Widdig A, Gerald MS. Rhesus macaques (*Macaca mulatta*) as living fossils of hominoid personality and subjective well-being. *J Comp Psychol.* 2011;125(1):72-83. doi: 10.1037/a0021187.
51. Robinson LM, Waran NK, Leach MC, Morton FB, Paukner A, Lonsdorf E, et al. Happiness is positive welfare in brown capuchins (*Sapajus apella*). *Appl Anim Behav Sci.* 2016;181:145-51. doi: 10.1016/j.applanim.2016.05.029. PubMed PMID: WOS:000381171300019.
52. Wilt J, Revelle W. Extraversion. In: Widiger TA, editor. *The Oxford Handbook of the Five Factor Model*. New York: Oxford University Press; 2017. p. 57-82.
53. Tackett JL, Lahey BB. Neuroticism. In: Widiger TA, editor. *The Oxford Handbook of the Five Factor Model*. New York: Oxford University Press; 2017. p. 39-56.
54. Staes N, Sherwood CC, Freeman H, Brosnan SF, Schapiro SJ, Hopkins WD, et al. Serotonin Receptor 1A Variation Is Associated with Anxiety and Agonistic Behavior in Chimpanzees. *Mol Biol Evol.* 2019;36(7):1418-29. doi: 10.1093/molbev/msz061.
55. Hayashi T, Hou Y, Glasser MF, Autio JA, Knoblauch K, Inoue-Murayama M, et al. The nonhuman primate neuroimaging and neuroanatomy project. *Neuroimage.* 2021;229:117726. doi: <https://doi.org/10.1016/j.neuroimage.2021.117726>.
56. Weiss A. Exploring factor space (and other adventures) with the Hominoid Personality Questionnaire. In: Vonk J, Weiss A, Kuczaj S, editors. *Personality in Nonhuman Animals*. Cham, Switzerland: Springer; 2017. p. 19-38.
57. Goldberg LR. An alternative "description of personality": the Big-Five factor structure. *Journal of Personality and Social Psychology.* 1990;59(6):1216-29. doi: 10.1037/0022-3514.59.6.1216. PubMed PMID: 2283588.

58. McCrae RR, Costa PT, Jr. Updating Norman's "adequate taxonomy": Intelligence and personality dimensions in natural language and in questionnaires. *J Pers Soc Psychol.* 1985;49(3):710-21. doi: 10.1037/0022-3514.49.3.710.
59. Costa PT, Jr., McCrae RR. Revised NEO Personality Inventory (NEO-PI-R) and NEO Five-Factor Inventory (NEO-FFI) professional manual. Odessa, FL: Psychological Assessment Resources; 1992.
60. Diener E, Suh EM, Lucas RE, Smith HL. Subjective well-being: Three decades of progress. *Psychological Bulletin.* 1999;125(2):276-302. doi: 10.1037/0033-2909.125.2.276.
61. Diener E, Emmons RA. The independence of positive and negative affect. *J Pers Soc Psychol.* 1984;47(5):1105-17. doi: 10.1037//0022-3514.47.5.1105.
62. Pavot W, Diener E, Colvin CR, Sandvik E. Further validation of the Satisfaction with Life Scale - Evidence for the cross-method convergence of well-being measures. *Journal of Personality Assessment.* 1991;57(1):149-61. doi: 10.1207/s15327752jpa5701\_17.
63. Campbell A. The sense of well-being in America: Recent patterns and trends. New York: McGraw-Hill; 1981.
64. Cantor N, Sanderson CA. Life task participation and well-being: The importance of taking part in daily life. In: Kahneman D, Diener E, Schwarz N, editors. *Well-being: The foundations of hedonic psychology.* New York: Russell Sage Foundation; 1999. p. 230-43.
65. R Core Team. *R: A language and environment for statistical computing.* Vienna, Austria: R Foundation for Statistical Computing; 2020.
66. Revelle W. *psych: Procedures for psychological, psychometric, and personality research.* 1.9.12 ed. Evanston, IL: Northwestern University; 2019.
67. Navarro-Gonzalez D, Lorenzo-Seva U. *EFA.MRFA: Dimensionality assessment using minimum rank factor analysis.* 1.0.9 ed2020.

68. de Winter JCF, Dodou D, Wieringa PA. Exploratory factor analysis with small sample sizes. *Multivariate Behavioral Research*. 2009;44(2):147-81. doi: 10.1080/00273170902794206.
69. MacCallum RC, Widaman KF, Zhang S, Hong S. Sample size in factor analysis. *Psychological Methods*. 1999;4(1):84-99. doi: 10.1037/1082-989X.4.1.84.
70. Mundfrom DJ, Shaw DG, Ke TL. Minimum sample size recommendations for conducting factor analyses. *International Journal of Testing*. 2005;5(2):159-68. doi: 10.1207/s15327574ijt0502\_4.
71. Horn JL. A rationale and test for the number of factors in factor analysis. *Psychometrika*. 1965;30:179-85. doi: 10.1007/BF02289447.
72. Auerswald M, Moshagen M. How to determine the number of factors to retain in exploratory factor analysis: a comparison of extraction methods under realistic conditions. *Psychol Methods*. 2019;24(4):468-91. doi: 10.1037/met0000200.
73. Schwarz G. Estimating the dimension of a model. *Annals of Statistics*. 1978;6(2):461-4. doi: 10.1214/aos/1176344136.
74. Ceulemans E, Kiers HAL. Selecting among three-mode principal component models of different types and complexities: A numerical convex hull based method. *Br J Math Stat Psychol*. 2006;59(1):133-50. doi: 10.1348/000711005X64817.
75. Lorenzo-Seva U, Timmerman ME, Kiers HA. The Hull method for selecting the number of common factors. *Multivar Behav Res*. 2011;46(2):340-64. doi: 10.1080/00273171.2011.564527.
76. Wainer H. Estimating coefficients in linear models: It don't make no nevermind. *Psychol Bull*. 1976;83:213-7.
77. Holm S. A simple sequentially rejective multiple test procedure. *Scandinavian Journal of Statistics*. 1979;6(2):65-70.

78. Costa PT, Jr., McCrae RR. Manual supplement for the NEO-4. Odessa, FL: Psychological Assessment Resources; 1998.
79. Bäckström M, Björklund F, Larsson MR. Five-factor inventories have a major general factor related to social desirability which can be reduced by framing items neutrally. *J Res Pers.* 2009;43(3):335-44.
80. Freeman HD, Gosling SD. Personality in nonhuman primates: A review and evaluation of past research. *Am J Primatol.* 2010;72(8):653-71. doi: 10.1002/ajp.20833.
81. Costa PT, Jr., McCrae RR. Cross-sectional studies of personality in a national sample: I. Development and validation of survey measures. *Psychology and Aging.* 1986;1(2):140-3. doi: 10.1037/0882-7974.1.2.140.
82. Digman JM. Higher-order factors of the Big Five. *J Pers Soc Psychol.* 1997;73(6):1246-56. doi: 10.1037/0022-3514.73.6.1246.
83. Musek J. A general factor of personality: Evidence for the Big One in the Five-Factor Model. *J Res Pers.* 2007;41(6):1213-33. doi: 10.1016/j.jrp.2007.02.003.
84. Revelle W, Wilt J. The general factor of personality: A general critique. *J Res Pers.* 2013;47(5):493-504. doi: 10.1016/j.jrp.2013.04.012.
85. Ferguson E, Chamorro-Premuzic T, Pickering A, Weiss A. Five into one doesn't go: A critique of the General Factor of Personality. In: Chamorro-Premuzic T, von Stumm S, Furnham A, editors. *The Wiley-Blackwell Handbook of Individual Differences.* West Sussex, UK: Wiley-Blackwell; 2011. p. 162-86.
86. Mutch C. Higher-order factors of the Big Five model of personality: A reanalysis of Digman (1997). *Psychol Rep.* 2005;96(1):167-77. doi: 10.2466/pr0.96.1.167-177.
87. Weiss A, Bates TC, Luciano M. Happiness is a personal(ity) thing: The genetics of personality and well-being in a representative sample. *Psychol Sci.* 2008;19:205-10. doi: 10.1111/j.1467-9280.2008.02068.x.

88. Weiss A, Baselmans BML, Hofer E, Yang J, Okbay A, Lind PA, et al. Personality polygenes, positive affect, and life satisfaction. *Twin Res Hum Genet.* 2016;19(5):407-17. doi: 10.1017/thg.2016.65.
89. Hahn E, Gottschling J, König CJ, Spinath FM. The heritability of job satisfaction reconsidered: only unique environmental influences beyond personality. *Journal of Business and Psychology.* 2016;31(2):217-31. doi: 10.1007/s10869-015-9413-x.
90. Hahn E, Johnson W, Spinath FM. Beyond the heritability of life satisfaction – The roles of personality and twin-specific influences. *Journal of Research in Personality.* 2013;47(6):757-67. doi: 0.1016/j.jrp.2013.07.003.
91. Adams MJ, King JE, Weiss A. The majority of genetic variation in orangutan personality and subjective-well being is nonadditive. *Behav Genet.* 2012;42:675-86. doi: 10.1007/s10519-012-9537-y.
92. Weiss A, King JE, Enns RM. Subjective well-being is heritable and genetically correlated with dominance in chimpanzees (*Pan troglodytes*). *J Pers Soc Psychol.* 2002;83:1141-9. doi: 10.1037//0022-3514.83.5.1141.
93. Munafò MR, Freimer NB, Ng W, Ophoff R, Veijola J, Miettunen J, et al. 5-HTTLPR genotype and anxiety-related personality traits: A meta-analysis and new data. *Am J Med Genet B Neuropsychiatr Genet.* 2009;150B(2):271-81. doi: 10.1002/ajmg.b.30808.
