# Supplementary material for: Personality, Subjective Well-Being, and the Serotonin 1a Receptor Gene in Common Marmosets (Callithrix jacchus)
Source: bioRxiv or medRxiv preprint supplement (doi:10.1101/2020.04.30.069773), 2021-06-23
Supplement: Supplementary file [file media-1.pdf]

## Supplementary Figures

Figure S1

Parallel Analysis Scree Plots

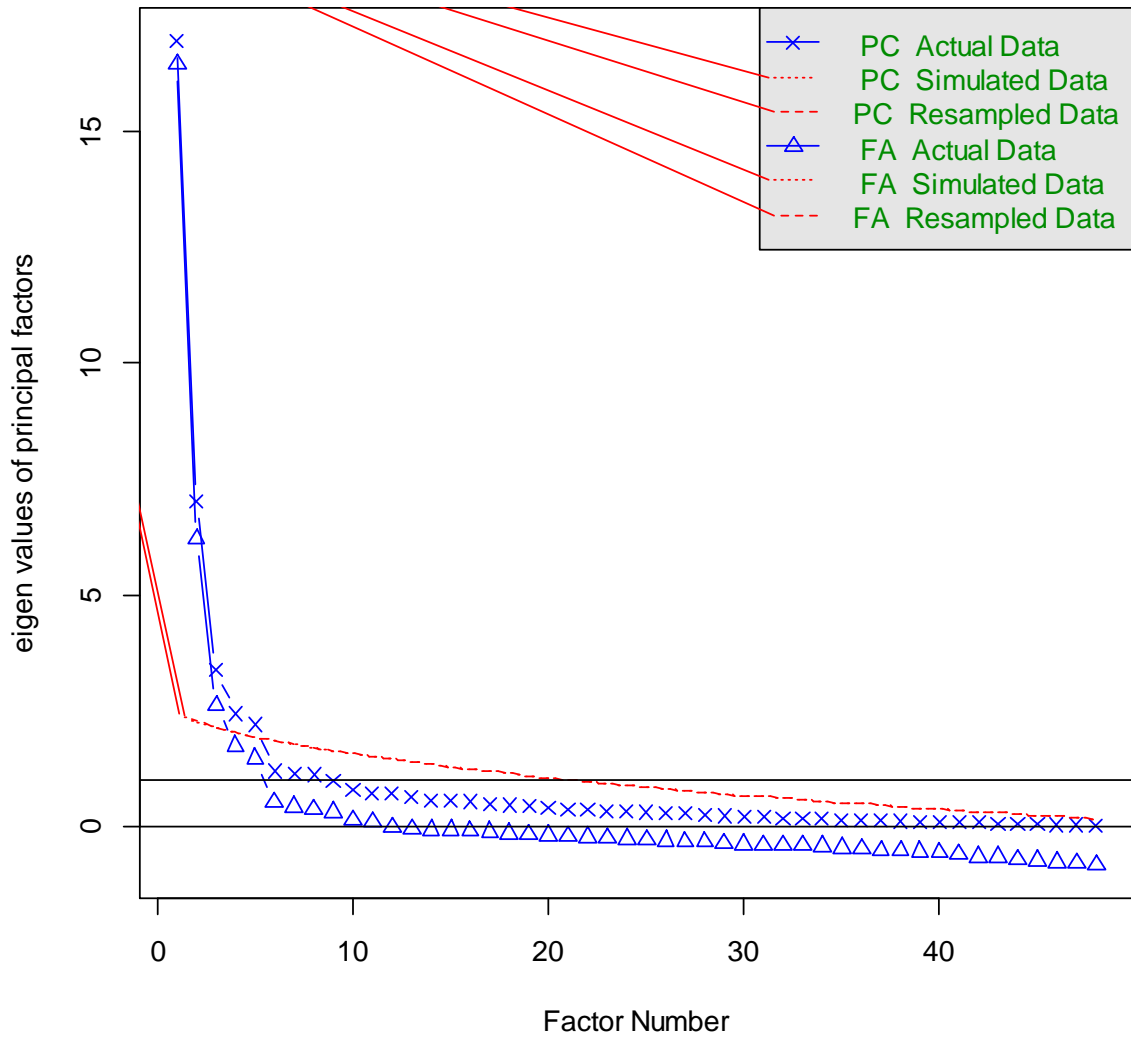

Figure S1

**Figure S2**

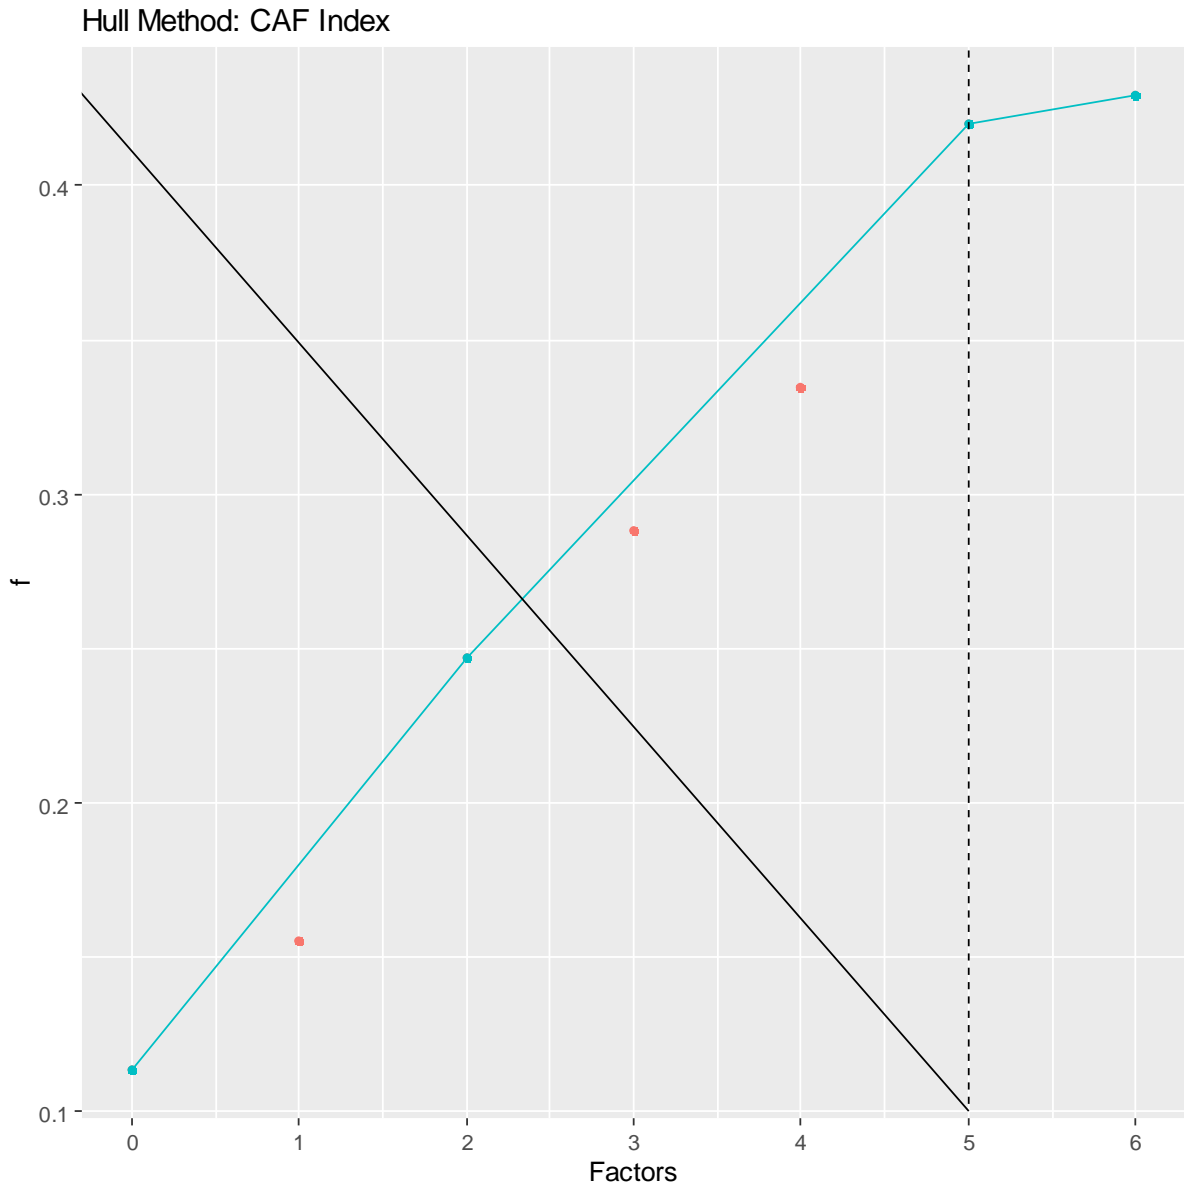

**Figure S2**

Figure S3

### Parallel Analysis Scree Plots

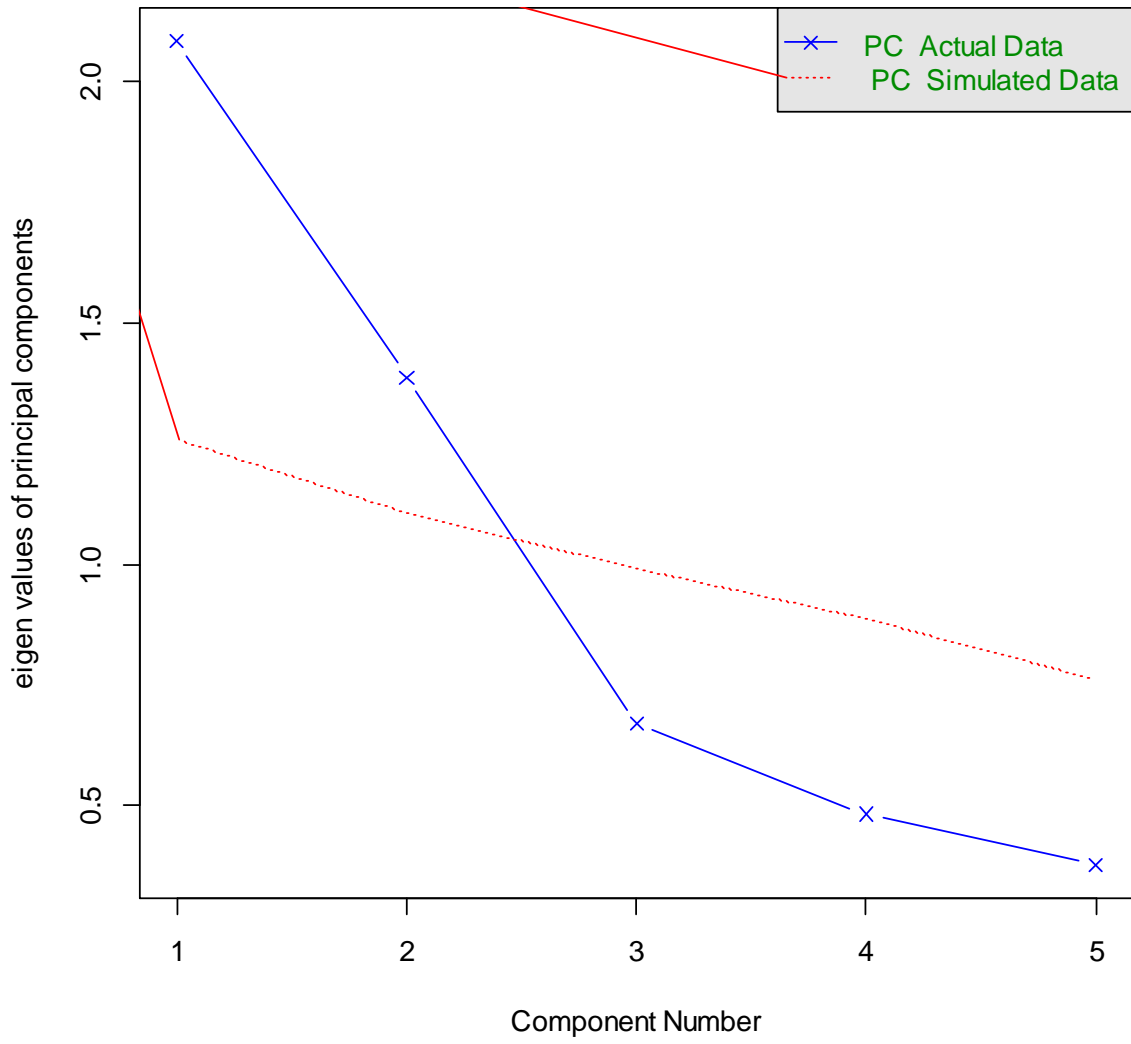

Figure S3

Figure S4

Parallel Analysis Scree Plots

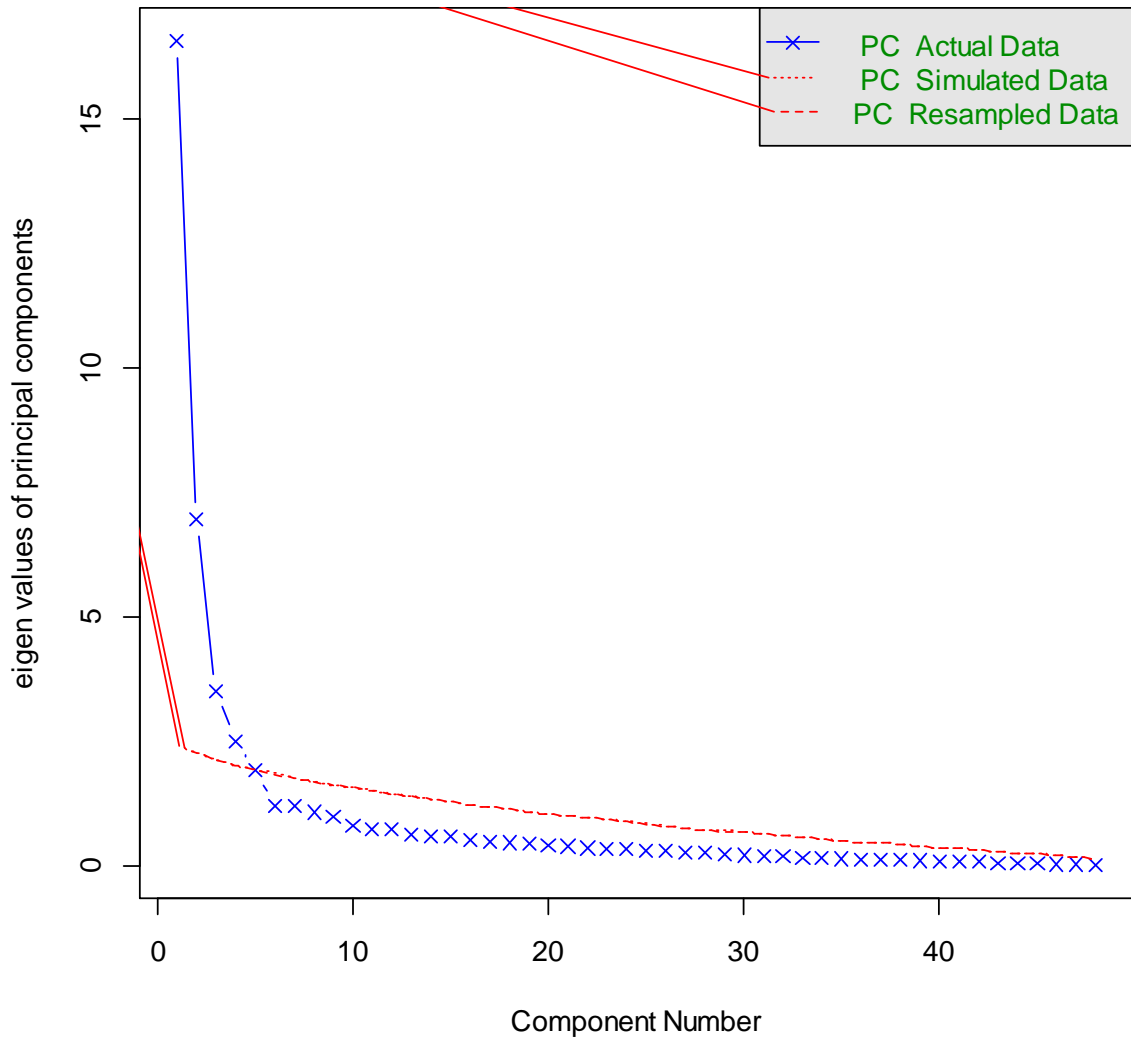

Figure S4

Figure S5

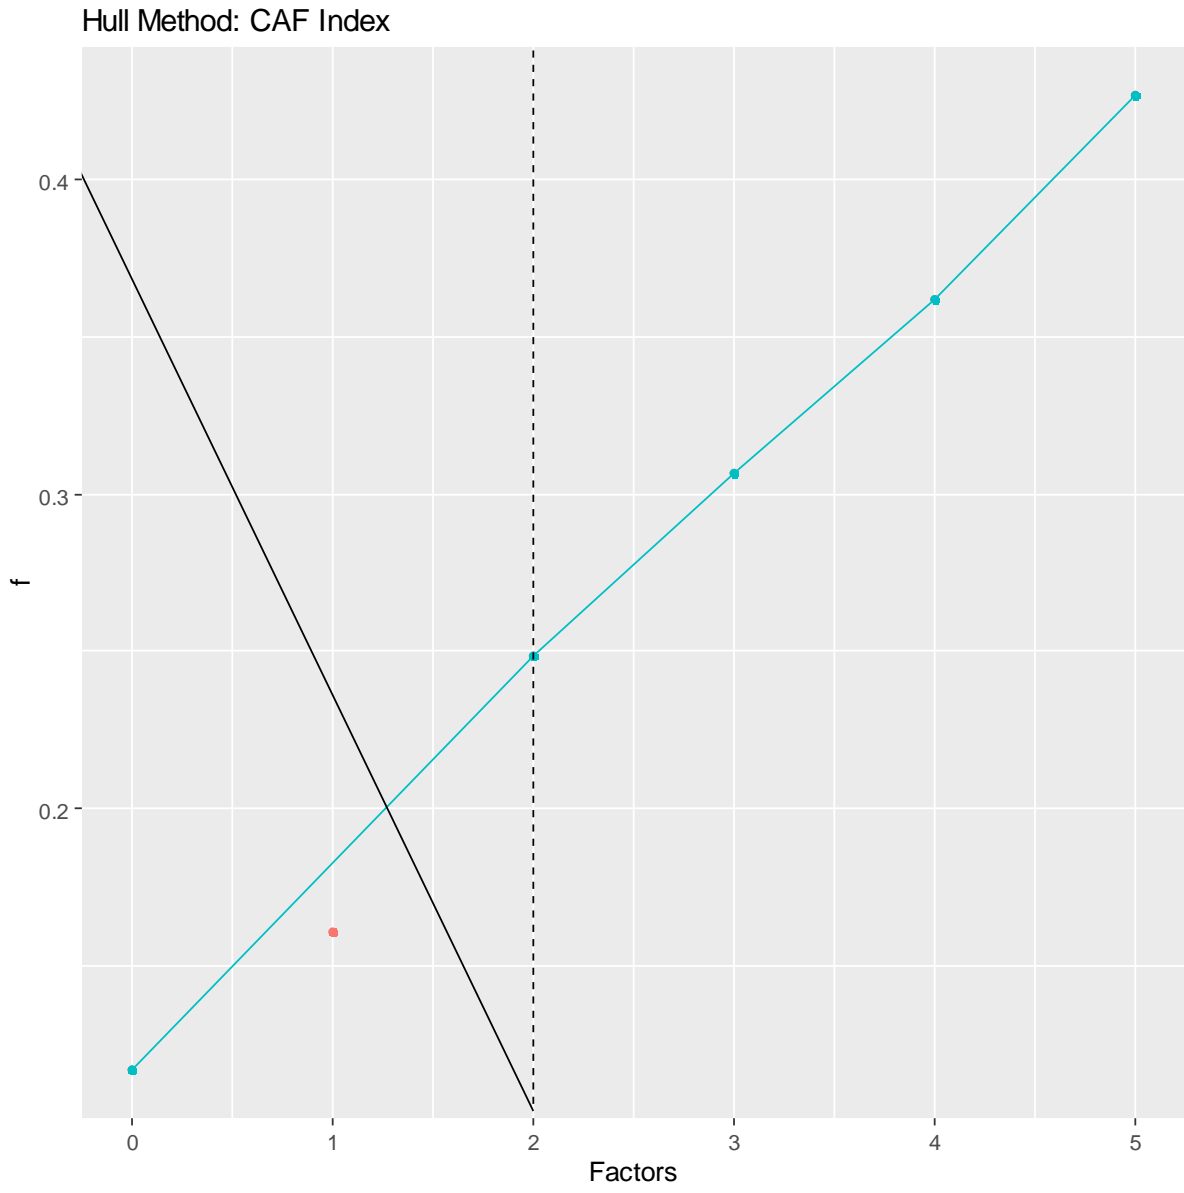

Figure S5

Figure S6

Parallel Analysis Scree Plots

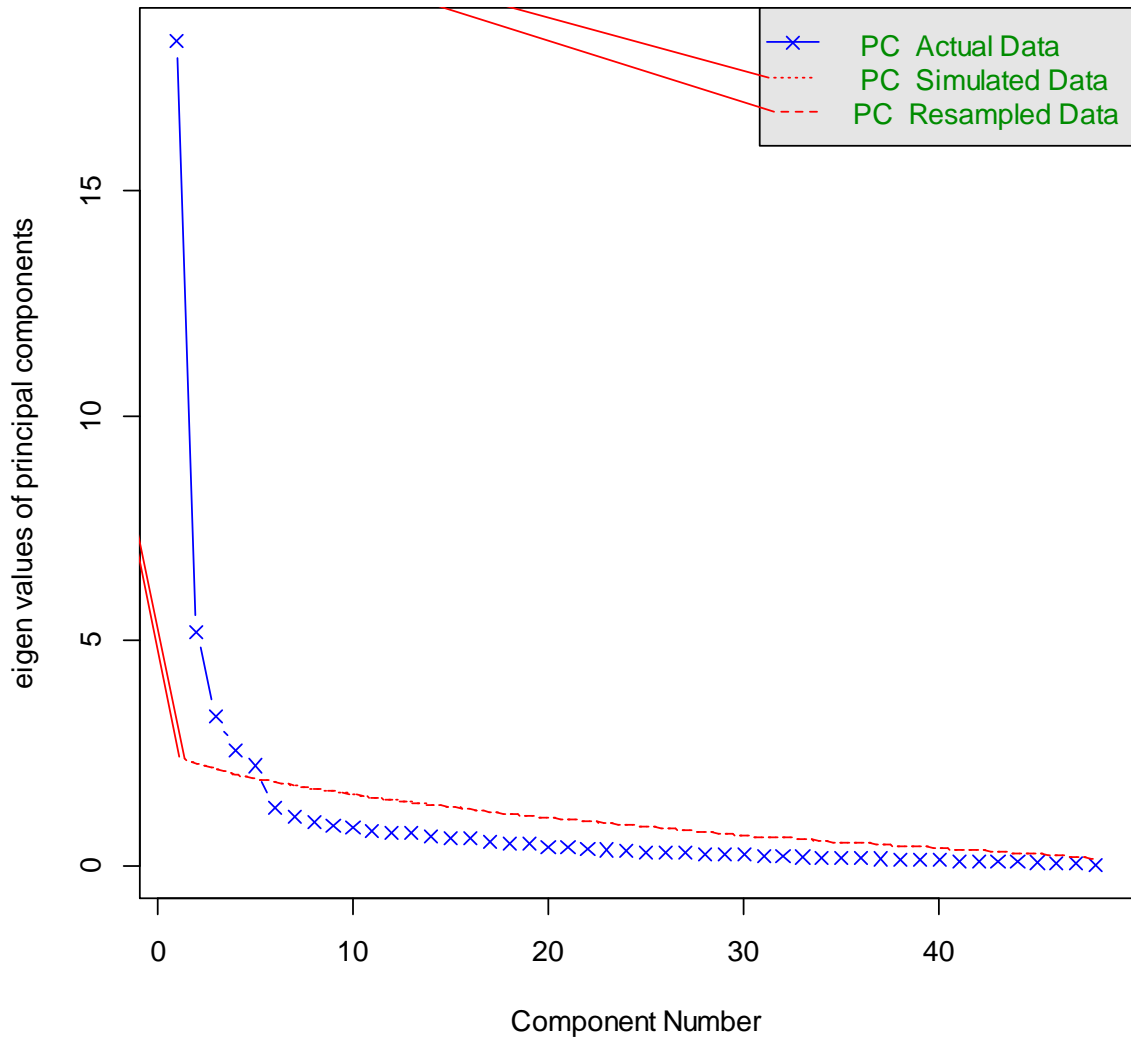

Figure S6

**Figure S7**

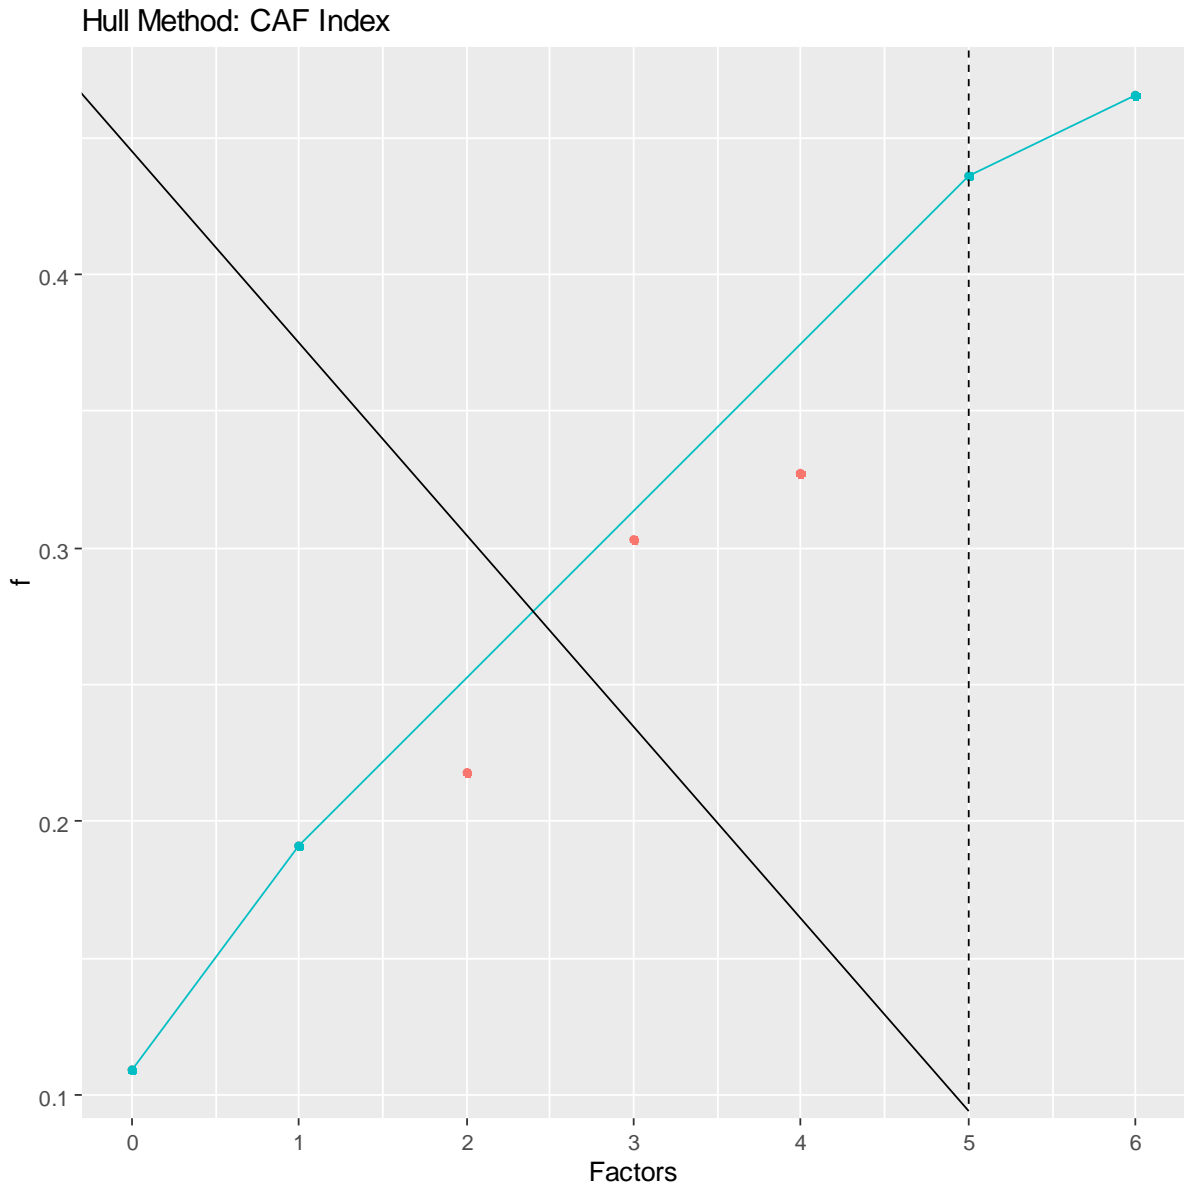

**Figure S7**



Figure S8

### Parallel Analysis Scree Plots

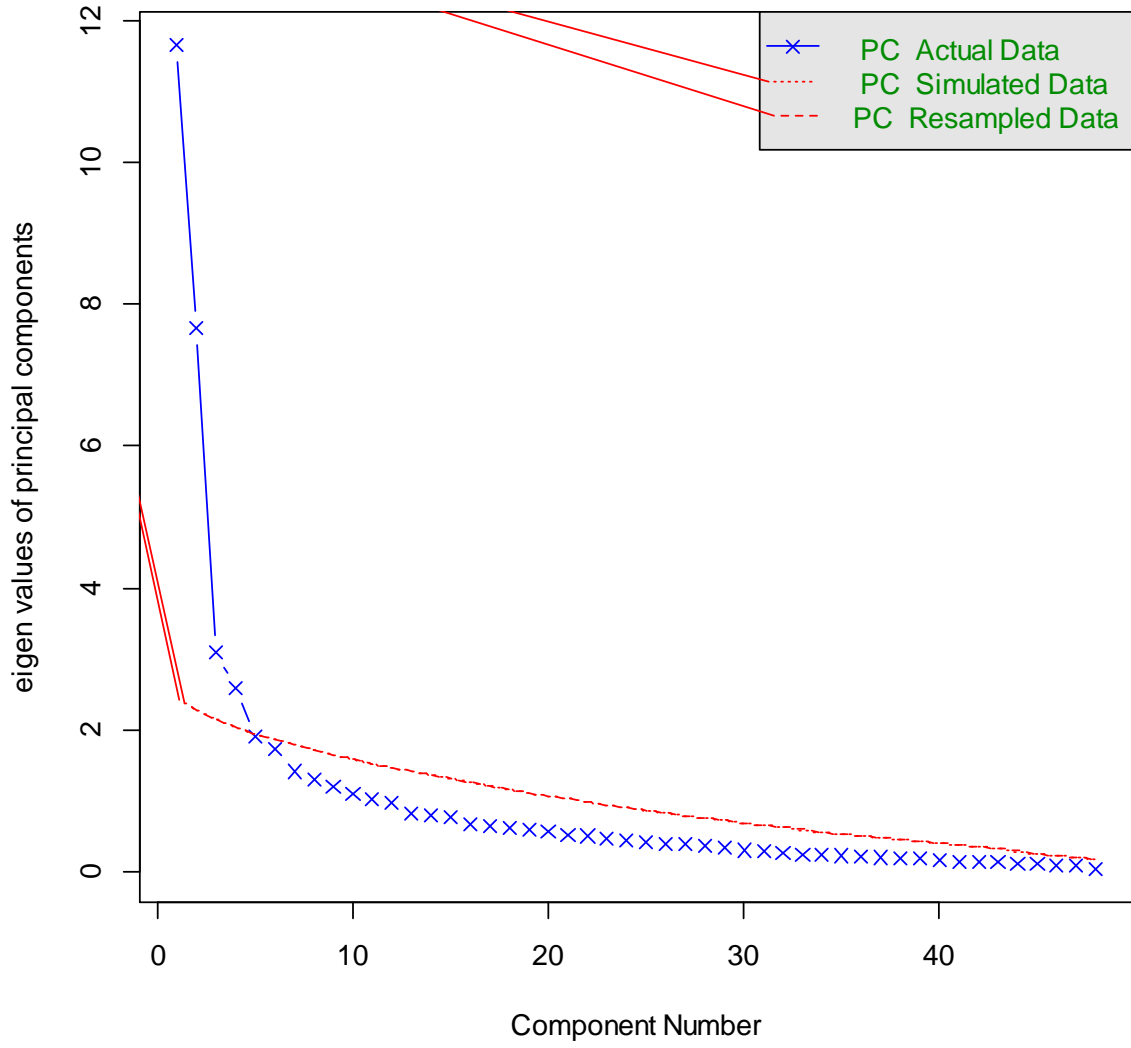

Figure S8

**Figure S9**

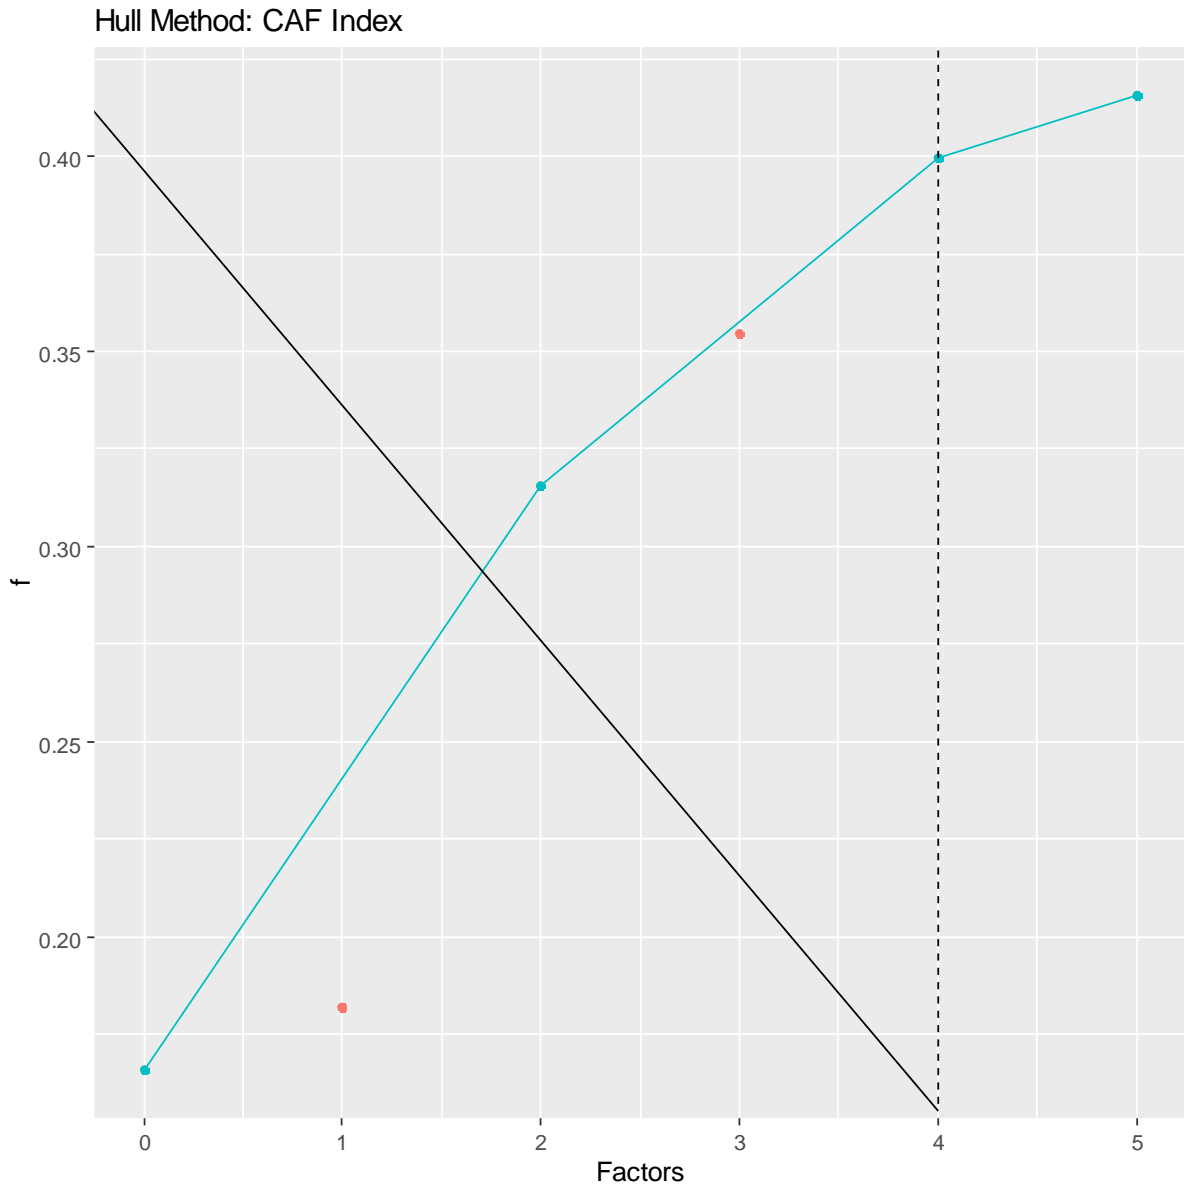

**Figure S9**

Figure S10

Parallel Analysis Scree Plots

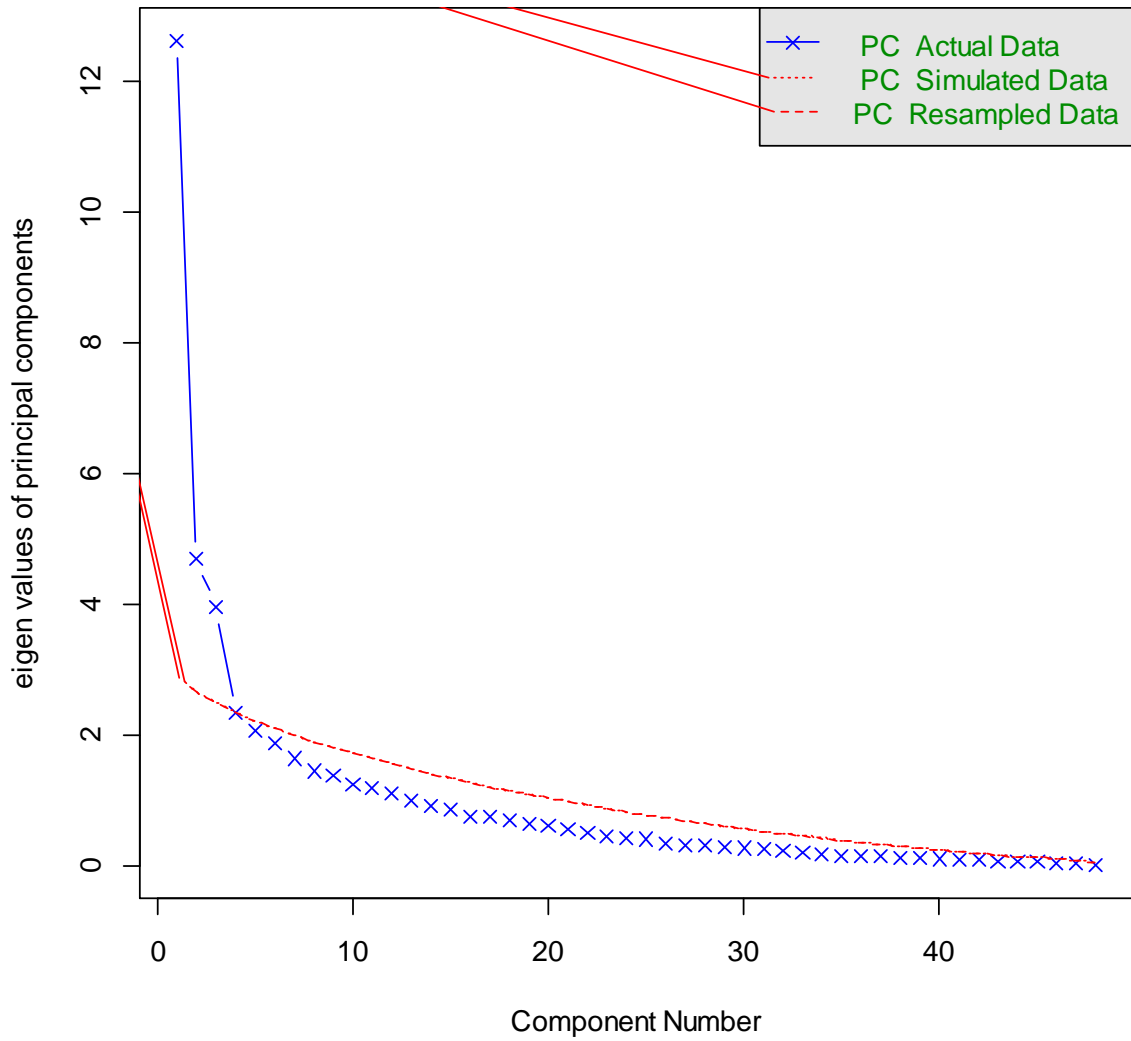

Figure S10

**Figure S11**

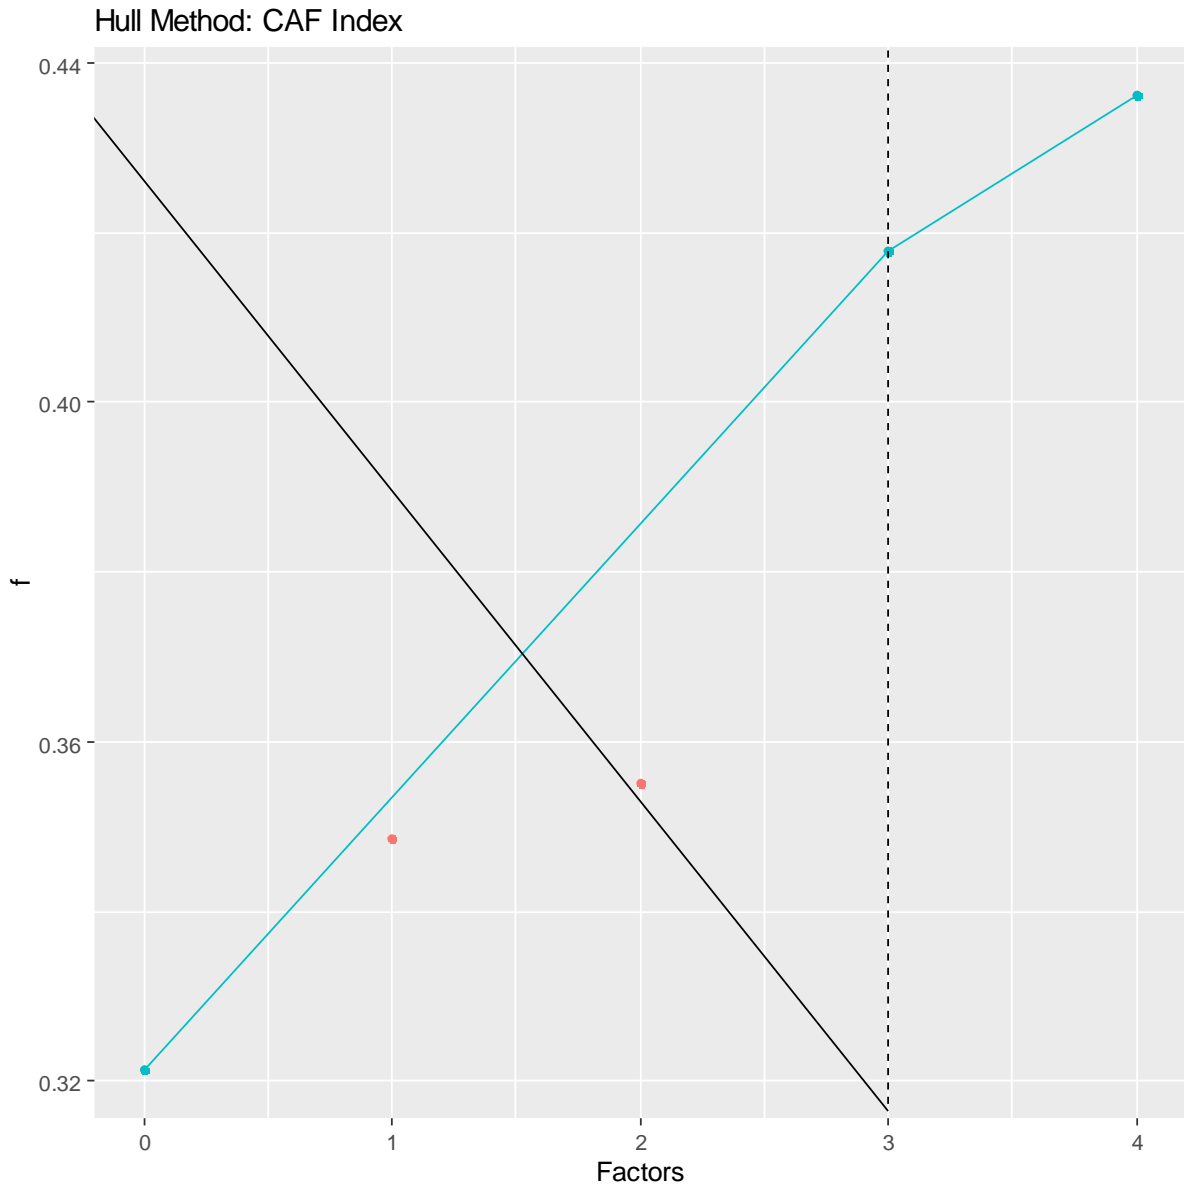

**Figure S11**

Figure S12

Parallel Analysis Scree Plots

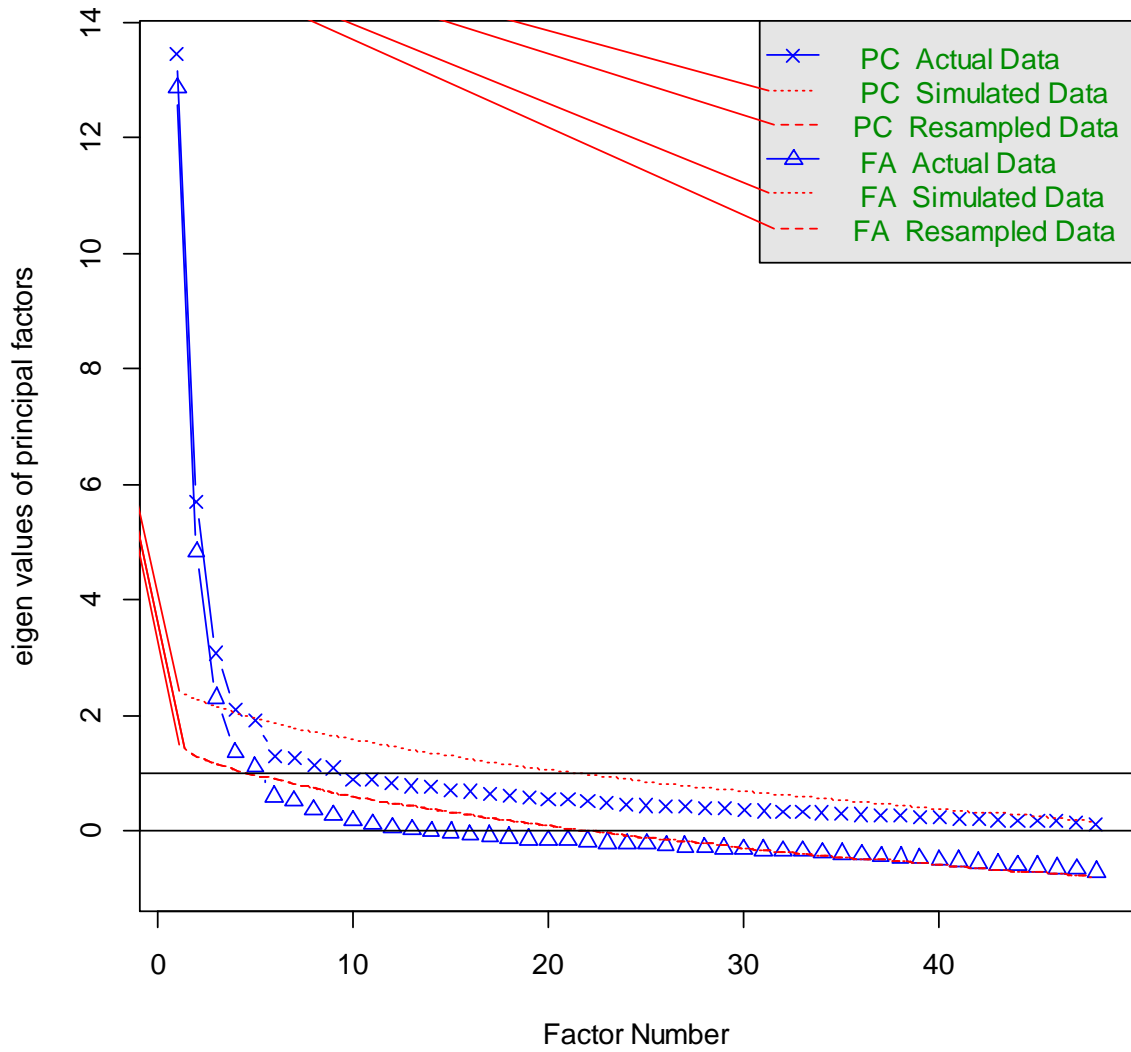

Figure S12

Figure S13

Parallel Analysis Scree Plots

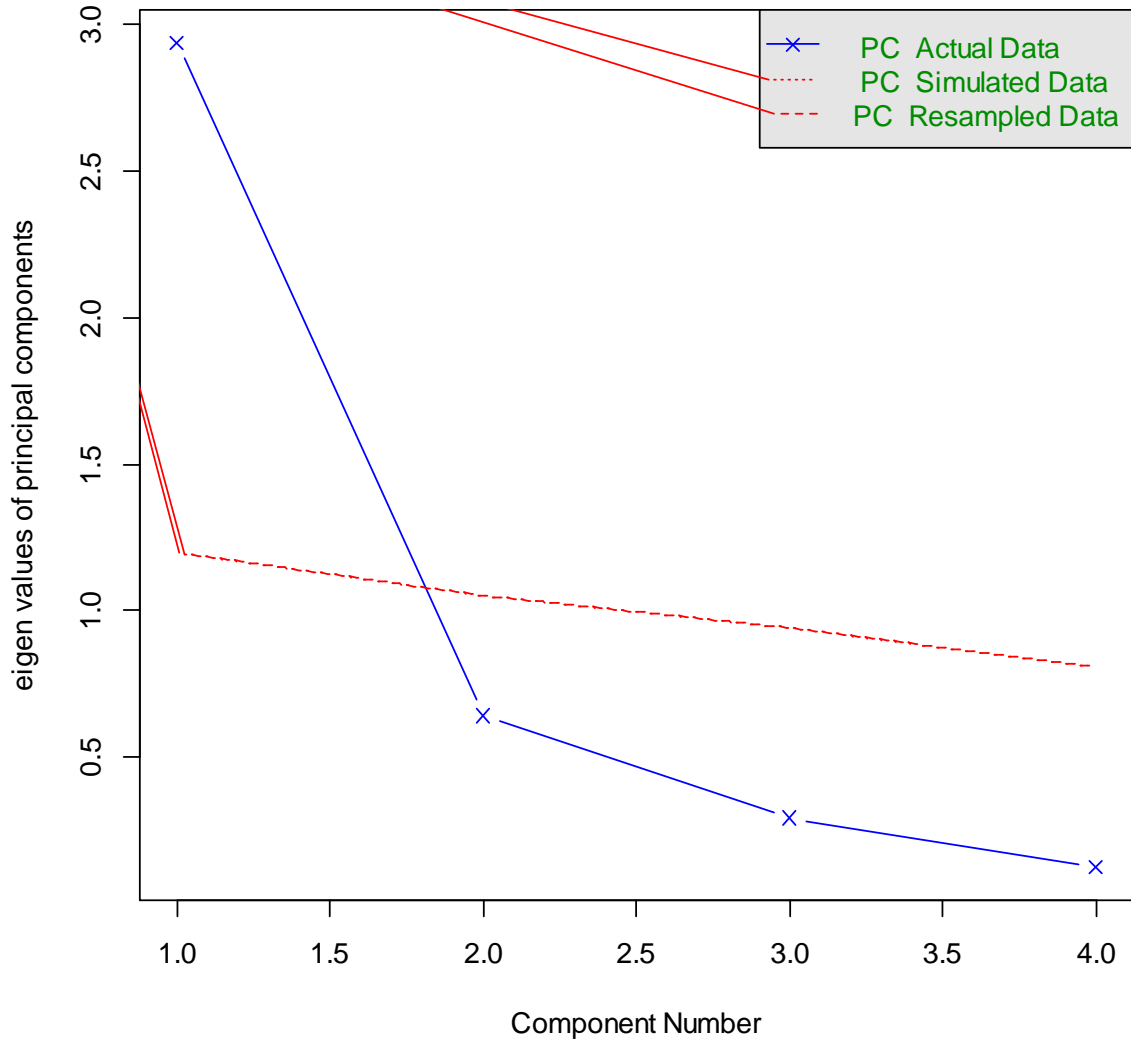

Figure S13
