# Supplementary material for: Personality, Subjective Well-Being, and the Serotonin 1a Receptor Gene in Common Marmosets (Callithrix jacchus)
Source: bioRxiv or medRxiv preprint supplement (doi:10.1101/2020.04.30.069773), 2021-06-23
Supplement: Supplementary file [file media-2.pdf]

## Supplementary Tables

Table S1  
*Computation of Unit-Weighted Factor Scores*

| Source / Factor              | Score                                                                                                                                                                                                                                                                 |
|------------------------------|-----------------------------------------------------------------------------------------------------------------------------------------------------------------------------------------------------------------------------------------------------------------------|
| Iwanicki and Lehmann (2015)  |                                                                                                                                                                                                                                                                       |
| Extraversion <sup>1</sup>    | (dominant + stingy.greedy – submissive + independent – timid + defiant + reckless – depressed – cautious – solitary + 40)/10                                                                                                                                          |
| Agreeableness <sup>2</sup>   | (affectionate + helpful + cool – aggressive – irritable + gentle + 16)/6                                                                                                                                                                                              |
| Conscientiousness            | (predictable + protective + conventional + intelligent)/4                                                                                                                                                                                                             |
| Openness                     | (active + curious + inventive)/3                                                                                                                                                                                                                                      |
| Koski et al. (2017)          |                                                                                                                                                                                                                                                                       |
| Conscientiousness            | (– thoughtless – bullying – clumsy – reckless – disorganized – imitative – erratic – jealous – aggressive – irritable – impulsive – excitable depressed – stingy.greedy – playful + 128)/15                                                                           |
| Agreeableness                | (friendly + affectionate + gentle + sociable + helpful + predictable + unemotional + protective)/8                                                                                                                                                                    |
| Assertiveness                | (– cautious – dependent..follower – dominant + independent – timid – submissive – fearful – vulnerable – sympathetic + 56)/9                                                                                                                                          |
| Patience                     | (– distractible + intelligent + inventive + sensitive + 8)/4                                                                                                                                                                                                          |
| Inquisitive                  | (– lazy + inquisitive + active - solitary + 16)/4                                                                                                                                                                                                                     |
| Inoue-Murayama et al. (2018) |                                                                                                                                                                                                                                                                       |
| Dominance                    | (defiant + stingy.greedy + jealous + aggressive + dominant + irritable + bullying + excitable + impulsive – submissive – friendly – gentle – cool + disorganized + erratic + active + manipulative – conventional – predictable + distractible + thoughtless + 48)/21 |
| Sociability                  | (helpful – solitary + imitative + dependent..follower + protective – individualistic – independent + sociable + sympathetic + affectionate + playful + sensitive + curious + inquisitive – lazy + 32)/15                                                              |
| Neuroticism                  | (timid – stable + autistic + fearful + vulnerable – intelligent + clumsy + depressed + 16)/8                                                                                                                                                                          |

*Note.* A constant equal to 8 time the number of items with negative loadings was added to some factor scores. <sup>1</sup> The factor from the original paper had a positive loading on “bold”. We substituted “timid” (reversed) for this item. <sup>2</sup> The factor from the original paper had positive loadings on “calm” and “cooperative”. We substituted “cool” and “helpful”, respectively, for these items.

Table S2  
*Bayesian Information Criteria (BIC) for Each Analysis*

| Factors | Analyses         |                     |                  |                  |                  |                             |
|---------|------------------|---------------------|------------------|------------------|------------------|-----------------------------|
|         | Primary          | Residualized scores | Rater 1          | Rater 2          | Rater 3          | Weighted correlation matrix |
| 1       | -1884.750        | -1988.770           | -2207.226        | -2296.935        | -2872.866        | -3450.794                   |
| 2       | -2598.698        | -2658.946           | -2550.354        | -2938.084        | -2897.494        | -3773.106                   |
| 3       | -2749.458        | -2835.079           | -2882.278        | -3007.134        | <b>-2918.697</b> | <b>-3819.233</b>            |
| 4       | -2883.281        | -2942.436           | -2962.079        | <b>-3044.861</b> | -2859.360        | -3776.708                   |
| 5       | <b>-2968.296</b> | <b>-2991.407</b>    | <b>-3032.412</b> | -3036.543        | -2769.791        | -3707.196                   |
| 6       | -2919.464        | -2932.316           | -2983.858        | -2978.983        | -2680.952        | -3589.986                   |
| 7       | -2840.690        | -2843.370           | -2896.522        | -2918.050        | -2568.438        | -3466.880                   |
| 8       | -2751.406        | -2750.118           | -2784.261        | -2808.443        | -2463.626        | -3324.194                   |

*Note.* The lowest BIC for each analysis is in bold.

Table S3

*Congruence Coefficients for Comparison of Varimax- and Promax-Rotated Structure*

|     | ML1   | ML4   | ML5   | ML2   | ML3   |
|-----|-------|-------|-------|-------|-------|
| ML1 | 0.95  | -0.37 | -0.32 | 0.12  | -0.08 |
| ML4 | -0.35 | 0.92  | 0.39  | 0.22  | -0.18 |
| ML5 | -0.32 | 0.40  | 0.94  | 0.24  | -0.06 |
| ML2 | 0.12  | 0.14  | 0.14  | 0.97  | -0.23 |
| ML3 | -0.05 | -0.11 | -0.03 | -0.19 | 0.97  |

Table S4

*Pattern Matrix from the First-Order Factor Analysis of the Hominoid Personality Questionnaire*

| Item               | Factor Loadings |              |              |              |              | $h^2$ |
|--------------------|-----------------|--------------|--------------|--------------|--------------|-------|
|                    | Soc             | Dom          | Imp          | Opn          | Neg          |       |
| Helpful            | <b>0.85</b>     | -0.10        | -0.16        | 0.12         | -0.13        | 0.79  |
| Sympathetic        | <b>0.82</b>     | -0.21        | -0.20        | 0.06         | 0.04         | 0.76  |
| Protective         | <b>0.77</b>     | -0.14        | -0.11        | 0.06         | -0.17        | 0.66  |
| Individualistic    | <b>-0.77</b>    | 0.22         | 0.11         | 0.07         | 0.23         | 0.71  |
| Sociable           | <b>0.74</b>     | <b>-0.40</b> | -0.31        | 0.15         | -0.17        | 0.85  |
| Dependent/follower | <b>0.73</b>     | -0.15        | -0.14        | 0.16         | 0.31         | 0.69  |
| Solitary           | <b>-0.72</b>    | 0.14         | 0.08         | -0.24        | 0.38         | 0.74  |
| Independent        | <b>-0.71</b>    | 0.32         | -0.08        | 0.06         | 0.05         | 0.62  |
| Affectionate       | <b>0.69</b>     | -0.27        | -0.26        | 0.17         | 0.07         | 0.65  |
| Sensitive          | <b>0.67</b>     | -0.26        | -0.29        | -0.05        | 0.03         | 0.61  |
| Imitative          | <b>0.66</b>     | -0.10        | -0.03        | 0.18         | 0.11         | 0.49  |
| Friendly           | <b>0.66</b>     | <b>-0.56</b> | -0.32        | 0.08         | 0.03         | 0.86  |
| Gentle             | <b>0.65</b>     | <b>-0.50</b> | -0.38        | 0.08         | 0.08         | 0.83  |
| Conventional       | <b>0.61</b>     | -0.15        | -0.39        | -0.18        | 0.19         | 0.62  |
| Intelligent        | <b>0.55</b>     | 0.07         | -0.20        | 0.04         | -0.22        | 0.39  |
| Reckless           | <b>-0.50</b>    | 0.10         | <b>0.43</b>  | <b>0.41</b>  | -0.08        | 0.62  |
| Jealous            | -0.24           | <b>0.82</b>  | 0.20         | 0.25         | 0.01         | 0.83  |
| Stingy/greedy      | -0.31           | <b>0.79</b>  | 0.20         | 0.30         | 0.01         | 0.86  |
| Bullying           | -0.29           | <b>0.78</b>  | 0.23         | 0.16         | -0.03        | 0.77  |
| Dominant           | -0.34           | <b>0.76</b>  | 0.27         | 0.09         | -0.15        | 0.80  |
| Aggressive         | -0.36           | <b>0.71</b>  | 0.33         | 0.05         | -0.22        | 0.80  |
| Defiant            | -0.32           | <b>0.69</b>  | 0.36         | 0.10         | -0.25        | 0.78  |
| Manipulative       | 0.03            | <b>0.62</b>  | 0.06         | 0.14         | <b>-0.40</b> | 0.57  |
| Irritable          | -0.27           | <b>0.58</b>  | <b>0.55</b>  | -0.07        | -0.12        | 0.74  |
| Excitable          | -0.26           | 0.37         | <b>0.75</b>  | 0.03         | -0.06        | 0.78  |
| Impulsive          | -0.30           | 0.28         | <b>0.73</b>  | 0.20         | 0.10         | 0.76  |
| Unemotional        | 0.04            | -0.09        | <b>-0.66</b> | -0.13        | 0.25         | 0.52  |
| Cool               | 0.35            | -0.28        | <b>-0.66</b> | -0.14        | 0.02         | 0.65  |
| Disorganized       | -0.27           | 0.30         | <b>0.54</b>  | 0.22         | 0.07         | 0.51  |
| Distractible       | -0.21           | 0.13         | <b>0.51</b>  | 0.26         | 0.06         | 0.40  |
| Stable             | <b>0.40</b>     | -0.30        | <b>-0.50</b> | 0.07         | -0.37        | 0.64  |
| Fearful            | 0.05            | -0.02        | <b>0.47</b>  | <b>-0.40</b> | 0.36         | 0.51  |
| Thoughtless        | -0.28           | 0.15         | <b>0.43</b>  | <b>0.40</b>  | -0.04        | 0.45  |
| Erratic            | <b>-0.40</b>    | <b>0.41</b>  | <b>0.43</b>  | -0.03        | 0.18         | 0.55  |
| Predictable        | 0.24            | -0.21        | <b>-0.40</b> | -0.02        | 0.02         | 0.27  |
| Curious            | 0.13            | 0.15         | 0.14         | <b>0.73</b>  | -0.14        | 0.61  |
| Inquisitive        | 0.16            | 0.12         | 0.11         | <b>0.70</b>  | -0.07        | 0.55  |
| Playful            | 0.22            | -0.02        | 0.28         | <b>0.67</b>  | -0.16        | 0.60  |
| Inventive          | 0.26            | 0.12         | 0.00         | <b>0.65</b>  | -0.05        | 0.51  |
| Active             | 0.16            | 0.27         | <b>0.42</b>  | <b>0.60</b>  | -0.25        | 0.69  |
| Cautious           | 0.31            | -0.02        | 0.12         | <b>-0.57</b> | 0.30         | 0.53  |
| Timid              | 0.00            | -0.01        | 0.27         | -0.25        | <b>0.66</b>  | 0.58  |

|                        |             |       |              |       |             |      |
|------------------------|-------------|-------|--------------|-------|-------------|------|
| Autistic               | 0.02        | -0.15 | 0.06         | 0.06  | <b>0.64</b> | 0.44 |
| Depressed              | -0.16       | -0.04 | -0.21        | -0.19 | <b>0.64</b> | 0.51 |
| Vulnerable             | 0.01        | -0.23 | -0.06        | -0.08 | <b>0.57</b> | 0.39 |
| Clumsy                 | -0.11       | 0.09  | 0.00         | -0.10 | <b>0.55</b> | 0.33 |
| Lazy                   | -0.14       | -0.18 | <b>-0.40</b> | -0.31 | <b>0.53</b> | 0.59 |
| Submissive             | <b>0.40</b> | -0.36 | -0.28        | -0.12 | <b>0.49</b> | 0.62 |
| Proportion of variance | 0.20        | 0.14  | 0.12         | 0.08  | 0.08        |      |

*Note.*  $N = 128$ . Soc = Sociability, Dom = Dominance, Imp = Impulsiveness, Opn = Openness, Neg = Negative Affect,  $h^2$  = communalities. Factors extracted using a maximum likelihood estimation and rotated using the varimax procedure. Factor loadings greater than or equal to  $|0.4|$  are in bold.

Table S5  
*Pattern Matrix from the Factor Analysis of Residualized Ratings*

| Item               | Factor       |              | $h^2$ |
|--------------------|--------------|--------------|-------|
|                    | I            | II           |       |
| Friendly           | <b>-0.90</b> | 0.11         | 0.81  |
| Gentle             | <b>-0.89</b> | 0.09         | 0.80  |
| Sociable           | <b>-0.86</b> | 0.36         | 0.84  |
| Sympathetic        | <b>-0.80</b> | 0.24         | 0.67  |
| Aggressive         | <b>0.79</b>  | 0.22         | 0.69  |
| Dominant           | <b>0.77</b>  | 0.22         | 0.67  |
| Stingy/greedy      | <b>0.76</b>  | 0.28         | 0.69  |
| Bullying           | <b>0.75</b>  | 0.20         | 0.63  |
| Affectionate       | <b>-0.75</b> | 0.20         | 0.58  |
| Helpful            | <b>-0.74</b> | <b>0.42</b>  | 0.69  |
| Defiant            | <b>0.74</b>  | 0.30         | 0.67  |
| Sensitive          | <b>-0.74</b> | 0.12         | 0.55  |
| Irritable          | <b>0.73</b>  | 0.16         | 0.57  |
| Jealous            | <b>0.72</b>  | 0.28         | 0.62  |
| Individualistic    | <b>0.72</b>  | -0.31        | 0.58  |
| Excitable          | <b>0.70</b>  | 0.19         | 0.54  |
| Protective         | <b>-0.69</b> | 0.38         | 0.59  |
| Cool               | <b>-0.68</b> | -0.16        | 0.50  |
| Conventional       | <b>-0.68</b> | -0.12        | 0.48  |
| Erratic            | <b>0.68</b>  | -0.09        | 0.46  |
| Impulsive          | <b>0.67</b>  | 0.18         | 0.50  |
| Stable             | <b>-0.67</b> | 0.24         | 0.48  |
| Independent        | <b>0.66</b>  | -0.19        | 0.46  |
| Disorganized       | <b>0.61</b>  | 0.19         | 0.43  |
| Dependent/follower | <b>-0.61</b> | 0.21         | 0.40  |
| Reckless           | <b>0.58</b>  | 0.25         | 0.42  |
| Submissive         | <b>-0.57</b> | -0.35        | 0.48  |
| Intelligent        | <b>-0.50</b> | 0.29         | 0.31  |
| Imitative          | <b>-0.49</b> | 0.31         | 0.32  |
| Predictable        | <b>-0.47</b> | -0.08        | 0.23  |
| Thoughtless        | <b>0.45</b>  | 0.29         | 0.30  |
| Distractible       | <b>0.45</b>  | 0.15         | 0.23  |
| Active             | 0.23         | <b>0.74</b>  | 0.63  |
| Lazy               | -0.09        | <b>-0.70</b> | 0.51  |
| Curious            | 0.07         | <b>0.64</b>  | 0.42  |
| Playful            | -0.05        | <b>0.64</b>  | 0.40  |
| Solitary           | 0.60         | <b>-0.62</b> | 0.69  |
| Inquisitive        | 0.06         | <b>0.61</b>  | 0.39  |
| Inventive          | -0.05        | <b>0.61</b>  | 0.37  |
| Depressed          | 0.03         | <b>-0.59</b> | 0.35  |
| Timid              | 0.15         | <b>-0.47</b> | 0.24  |
| Manipulative       | 0.35         | <b>0.46</b>  | 0.36  |

|                        |       |              |      |
|------------------------|-------|--------------|------|
| Vulnerable             | -0.11 | <b>-0.44</b> | 0.21 |
| Clumsy                 | 0.16  | -0.38        | 0.17 |
| Cautious               | -0.15 | -0.37        | 0.17 |
| Unemotional            | -0.29 | -0.37        | 0.23 |
| Autistic               | 0.02  | -0.35        | 0.12 |
| Fearful                | 0.17  | -0.32        | 0.12 |
| <hr/>                  |       |              |      |
| Proportion of variance | 0.34  | 0.13         |      |

*Note.*  $N = 128$ . Factors were not assigned labels.  $h^2$  = communalities. Factors extracted using a maximum likelihood estimation and rotated using the promax procedure. Factor loadings greater than or equal to  $|0.4|$  are in bold. Factor correlation ( $r_{I,II}$ ) = 0.07.



Table S6  
*Pattern Matrix from the Factor Analysis of Residualized Ratings*

| Item               | Factor       |              |              |             | $h^2$ |
|--------------------|--------------|--------------|--------------|-------------|-------|
|                    | I            | II           | III          | IV          |       |
| Independent        | <b>-0.83</b> | -0.09        | -0.07        | 0.07        | 0.62  |
| Helpful            | <b>0.81</b>  | -0.05        | -0.19        | 0.04        | 0.75  |
| Individualistic    | <b>-0.79</b> | 0.02         | 0.22         | 0.12        | 0.69  |
| Dependent/follower | <b>0.78</b>  | 0.09         | 0.24         | 0.14        | 0.61  |
| Sympathetic        | <b>0.78</b>  | -0.12        | 0.00         | 0.02        | 0.73  |
| Protective         | <b>0.75</b>  | -0.04        | -0.20        | 0.01        | 0.64  |
| Imitative          | <b>0.71</b>  | 0.15         | 0.07         | 0.13        | 0.45  |
| Solitary           | <b>-0.70</b> | 0.04         | 0.34         | -0.19       | 0.71  |
| Sociable           | <b>0.67</b>  | -0.34        | -0.13        | 0.17        | 0.83  |
| Sensitive          | <b>0.63</b>  | -0.20        | -0.05        | -0.09       | 0.58  |
| Friendly           | <b>0.59</b>  | <b>-0.45</b> | 0.14         | 0.15        | 0.84  |
| Affectionate       | <b>0.57</b>  | -0.29        | 0.08         | 0.18        | 0.60  |
| Gentle             | <b>0.55</b>  | <b>-0.48</b> | 0.14         | 0.15        | 0.82  |
| Conventional       | <b>0.49</b>  | -0.24        | 0.02         | -0.26       | 0.52  |
| Intelligent        | <b>0.42</b>  | -0.17        | -0.34        | -0.06       | 0.37  |
| Excitable          | 0.04         | <b>0.86</b>  | 0.03         | 0.00        | 0.71  |
| Irritable          | -0.07        | <b>0.80</b>  | -0.19        | -0.18       | 0.71  |
| Impulsive          | 0.00         | <b>0.79</b>  | 0.22         | 0.20        | 0.72  |
| Cool               | 0.09         | <b>-0.69</b> | -0.09        | -0.13       | 0.60  |
| Fearful            | 0.32         | <b>0.62</b>  | 0.39         | -0.38       | 0.51  |
| Stable             | 0.20         | <b>-0.62</b> | -0.37        | 0.07        | 0.64  |
| Disorganized       | -0.08        | <b>0.60</b>  | 0.13         | 0.22        | 0.52  |
| Unemotional        | -0.27        | <b>-0.59</b> | 0.02         | -0.17       | 0.34  |
| Erratic            | -0.21        | <b>0.59</b>  | 0.13         | -0.08       | 0.51  |
| Defiant            | -0.25        | <b>0.59</b>  | <b>-0.40</b> | -0.05       | 0.75  |
| Jealous            | -0.24        | <b>0.57</b>  | -0.27        | 0.04        | 0.64  |
| Aggressive         | -0.33        | <b>0.57</b>  | -0.38        | -0.09       | 0.76  |
| Dominant           | -0.32        | <b>0.55</b>  | -0.36        | -0.08       | 0.73  |
| Bullying           | -0.30        | <b>0.54</b>  | -0.27        | -0.02       | 0.65  |
| Stingy/greedy      | -0.33        | <b>0.51</b>  | -0.24        | 0.11        | 0.69  |
| Predictable        | 0.06         | <b>-0.49</b> | -0.02        | 0.00        | 0.27  |
| Distractible       | -0.08        | <b>0.42</b>  | 0.23         | 0.30        | 0.35  |
| Autistic           | -0.01        | 0.05         | <b>0.68</b>  | 0.15        | 0.41  |
| Timid              | 0.14         | <b>0.41</b>  | <b>0.64</b>  | -0.22       | 0.58  |
| Manipulative       | -0.04        | 0.32         | <b>-0.63</b> | -0.05       | 0.53  |
| Vulnerable         | -0.01        | -0.10        | <b>0.61</b>  | 0.02        | 0.39  |
| Depressed          | -0.25        | -0.16        | <b>0.51</b>  | -0.14       | 0.40  |
| Submissive         | 0.32         | -0.29        | <b>0.48</b>  | -0.06       | 0.58  |
| Clumsy             | -0.11        | 0.12         | <b>0.43</b>  | -0.09       | 0.24  |
| Lazy               | -0.33        | -0.37        | <b>0.42</b>  | -0.26       | 0.52  |
| Playful            | 0.26         | 0.11         | 0.04         | <b>0.72</b> | 0.60  |
| Curious            | 0.09         | 0.06         | -0.06        | <b>0.71</b> | 0.57  |

|                        |             |             |       |              |      |
|------------------------|-------------|-------------|-------|--------------|------|
| Inquisitive            | 0.12        | 0.09        | -0.04 | <b>0.67</b>  | 0.52 |
| Cautious               | <b>0.45</b> | <b>0.40</b> | 0.15  | <b>-0.66</b> | 0.54 |
| Inventive              | 0.19        | 0.05        | -0.09 | <b>0.60</b>  | 0.45 |
| Reckless               | -0.36       | 0.24        | 0.17  | <b>0.56</b>  | 0.61 |
| Active                 | 0.27        | <b>0.45</b> | -0.17 | <b>0.54</b>  | 0.68 |
| Thoughtless            | -0.16       | 0.31        | 0.15  | <b>0.47</b>  | 0.43 |
| Proportion of variance | 0.20        | 0.20        | 0.09  | 0.09         |      |

|     | Factor Correlations |       |       |      |
|-----|---------------------|-------|-------|------|
|     | I                   | II    | III   | IV   |
| I   | 1.00                |       |       |      |
| II  | -0.52               | 1.00  |       |      |
| III | 0.00                | -0.11 | 1.00  |      |
| IV  | 0.02                | 0.25  | -0.33 | 1.00 |

*Note.*  $N = 128$ . Factors were not assigned labels.  $h^2$  = communalities. Factors extracted using a maximum likelihood estimation and rotated using the promax procedure. Factor loadings greater than or equal to  $|0.4|$  are in bold.

Table S7

*Pattern Matrix from the Factor Analysis of Residualized Ratings*

| Item               | Factor       |              |              |              |             | $h^2$ |
|--------------------|--------------|--------------|--------------|--------------|-------------|-------|
|                    | Soc          | Dom          | Imp          | Opn          | Neg         |       |
| Helpful            | <b>0.85</b>  | 0.07         | -0.09        | 0.10         | -0.08       | 0.77  |
| Dependent/follower | <b>0.85</b>  | 0.02         | 0.07         | 0.21         | 0.34        | 0.67  |
| Sympathetic        | <b>0.84</b>  | 0.00         | -0.13        | 0.08         | 0.11        | 0.77  |
| Protective         | <b>0.78</b>  | 0.08         | -0.09        | 0.06         | -0.10       | 0.66  |
| Individualistic    | <b>-0.70</b> | 0.13         | -0.08        | 0.15         | 0.29        | 0.70  |
| Imitative          | <b>0.69</b>  | -0.04        | 0.18         | 0.14         | 0.07        | 0.45  |
| Independent        | <b>-0.68</b> | 0.31         | -0.31        | 0.14         | 0.12        | 0.66  |
| Sensitive          | <b>0.64</b>  | -0.08        | -0.16        | -0.05        | 0.00        | 0.59  |
| Affectionate       | <b>0.63</b>  | -0.10        | -0.24        | 0.25         | 0.18        | 0.65  |
| Conventional       | <b>0.59</b>  | 0.07         | -0.31        | -0.17        | 0.18        | 0.59  |
| Solitary           | <b>-0.57</b> | 0.19         | -0.13        | -0.13        | 0.46        | 0.75  |
| Sociable           | <b>0.57</b>  | -0.35        | -0.10        | 0.13         | -0.22       | 0.84  |
| Intelligent        | <b>0.54</b>  | 0.27         | -0.35        | 0.03         | -0.12       | 0.43  |
| Gentle             | <b>0.53</b>  | -0.34        | -0.26        | 0.18         | 0.13        | 0.83  |
| Jealous            | 0.02         | <b>0.84</b>  | 0.02         | 0.16         | 0.07        | 0.77  |
| Dominant           | -0.11        | <b>0.79</b>  | 0.04         | 0.01         | -0.08       | 0.79  |
| Stingy/greedy      | -0.09        | <b>0.78</b>  | 0.00         | 0.24         | 0.08        | 0.80  |
| Bullying           | -0.09        | <b>0.75</b>  | 0.05         | 0.08         | 0.01        | 0.72  |
| Aggressive         | -0.15        | <b>0.73</b>  | 0.09         | -0.02        | -0.14       | 0.79  |
| Defiant            | -0.08        | <b>0.73</b>  | 0.12         | 0.02         | -0.17       | 0.77  |
| Manipulative       | 0.12         | <b>0.68</b>  | -0.11        | 0.04         | -0.36       | 0.56  |
| Irritable          | 0.04         | <b>0.64</b>  | 0.38         | -0.14        | -0.05       | 0.71  |
| Friendly           | 0.45         | <b>-0.56</b> | -0.07        | 0.09         | -0.04       | 0.85  |
| Erratic            | -0.09        | <b>0.47</b>  | 0.27         | -0.03        | 0.27        | 0.54  |
| Impulsive          | -0.03        | 0.18         | <b>0.68</b>  | 0.15         | 0.13        | 0.72  |
| Cool               | 0.19         | -0.06        | <b>-0.67</b> | -0.02        | 0.08        | 0.66  |
| Fearful            | 0.21         | -0.07        | <b>0.66</b>  | <b>-0.48</b> | 0.19        | 0.55  |
| Unemotional        | -0.13        | 0.04         | <b>-0.66</b> | -0.05        | 0.23        | 0.43  |
| Excitable          | 0.03         | 0.34         | <b>0.64</b>  | -0.04        | -0.01       | 0.71  |
| Stable             | 0.18         | -0.19        | <b>-0.47</b> | 0.09         | -0.34       | 0.64  |
| Distractible       | -0.14        | -0.05        | <b>0.46</b>  | 0.24         | 0.10        | 0.37  |
| Disorganized       | -0.07        | 0.23         | <b>0.46</b>  | 0.20         | 0.12        | 0.52  |
| Predictable        | 0.12         | -0.09        | <b>-0.44</b> | 0.07         | 0.08        | 0.29  |
| Curious            | 0.17         | 0.13         | -0.01        | <b>0.77</b>  | 0.06        | 0.61  |
| Inquisitive        | 0.17         | 0.08         | 0.07         | <b>0.70</b>  | 0.03        | 0.53  |
| Playful            | 0.23         | -0.12        | 0.22         | <b>0.69</b>  | 0.00        | 0.59  |
| Inventive          | 0.30         | 0.18         | -0.06        | <b>0.68</b>  | 0.07        | 0.51  |
| Cautious           | <b>0.44</b>  | 0.14         | 0.27         | <b>-0.65</b> | 0.14        | 0.54  |
| Active             | 0.25         | 0.16         | 0.38         | <b>0.51</b>  | -0.18       | 0.68  |
| Reckless           | <b>-0.41</b> | -0.09        | 0.32         | <b>0.50</b>  | 0.06        | 0.62  |
| Thoughtless        | -0.19        | -0.02        | 0.35         | <b>0.43</b>  | 0.06        | 0.44  |
| Depressed          | -0.10        | 0.06         | -0.25        | -0.03        | <b>0.68</b> | 0.52  |

|                        |       |       |       |       |             |      |
|------------------------|-------|-------|-------|-------|-------------|------|
| Autistic               | 0.03  | -0.16 | 0.12  | 0.18  | <b>0.67</b> | 0.45 |
| Timid                  | 0.15  | -0.02 | 0.39  | -0.22 | <b>0.59</b> | 0.58 |
| Clumsy                 | 0.03  | 0.18  | -0.03 | 0.00  | <b>0.58</b> | 0.33 |
| Vulnerable             | 0.01  | -0.23 | 0.02  | 0.04  | <b>0.58</b> | 0.40 |
| Submissive             | 0.37  | -0.21 | -0.18 | 0.01  | <b>0.54</b> | 0.63 |
| Lazy                   | -0.24 | -0.09 | -0.36 | -0.18 | <b>0.51</b> | 0.57 |
| Proportion of variance | 0.18  | 0.15  | 0.12  | 0.09  | 0.08        |      |

|     | Factor Correlations |       |      |       |      |
|-----|---------------------|-------|------|-------|------|
|     | Soc                 | Dom   | Imp  | Opn   | Neg  |
| Soc | 1.00                |       |      |       |      |
| Dom | -0.56               | 1.00  |      |       |      |
| Imp | -0.40               | 0.50  | 1.00 |       |      |
| Opn | -0.02               | 0.21  | 0.24 | 1.00  |      |
| Neg | -0.17               | -0.12 | 0.07 | -0.38 | 1.00 |

*Note.*  $N = 128$ . Soc = Sociability, Dom = Dominance, Imp = Impulsiveness, Opn = Openness, Neg = Negative Affect,  $h^2$  = communalities. Factors extracted using a maximum likelihood estimation and rotated using the promax procedure. Factor loadings greater than or equal to  $|0.4|$  are in bold.

Table S8

*Congruence Coefficients for Comparison of Factors from Raw and Residualized Scores*

|     | MR5   | MR1   | MR4   | MR2   | MR3   |
|-----|-------|-------|-------|-------|-------|
| ML1 | 0.99  | -0.16 | -0.11 | 0.09  | -0.08 |
| ML4 | -0.12 | 0.98  | 0.11  | 0.10  | -0.07 |
| ML5 | -0.10 | 0.23  | 0.98  | 0.11  | -0.04 |
| ML2 | 0.15  | 0.07  | 0.06  | 0.99  | -0.02 |
| ML3 | 0.03  | -0.06 | 0.04  | -0.04 | 0.98  |

Table S9  
*Pattern Matrix from the Factor Analysis of Rater 1's Ratings*

| Item               | Factor       |              |              |             |             | $h^2$ |
|--------------------|--------------|--------------|--------------|-------------|-------------|-------|
|                    | Imp          | Soc          | Dom          | Opn         | Neg         |       |
| Impulsive          | <b>0.94</b>  | 0.06         | -0.07        | -0.01       | 0.05        | 0.77  |
| Excitable          | <b>0.91</b>  | 0.02         | -0.10        | -0.03       | 0.01        | 0.74  |
| Cool               | <b>-0.74</b> | 0.01         | -0.08        | 0.04        | 0.03        | 0.63  |
| Erratic            | <b>0.74</b>  | 0.05         | 0.15         | -0.08       | -0.01       | 0.65  |
| Distractible       | <b>0.69</b>  | -0.21        | -0.07        | 0.20        | 0.05        | 0.62  |
| Stable             | <b>-0.68</b> | -0.11        | -0.26        | 0.05        | -0.08       | 0.61  |
| Unemotional        | <b>-0.67</b> | 0.10         | -0.02        | -0.06       | 0.27        | 0.67  |
| Disorganized       | <b>0.65</b>  | -0.19        | -0.01        | 0.09        | 0.07        | 0.58  |
| Predictable        | <b>-0.64</b> | 0.21         | 0.15         | -0.28       | 0.03        | 0.53  |
| Reckless           | <b>0.64</b>  | -0.33        | -0.03        | 0.22        | 0.03        | 0.72  |
| Fearful            | <b>0.60</b>  | 0.26         | 0.02         | -0.30       | 0.25        | 0.47  |
| Irritable          | <b>0.58</b>  | 0.14         | 0.36         | -0.18       | -0.26       | 0.69  |
| Thoughtless        | <b>0.57</b>  | -0.19        | 0.02         | 0.28        | 0.06        | 0.50  |
| Timid              | <b>0.54</b>  | 0.08         | 0.16         | -0.06       | <b>0.42</b> | 0.51  |
| Clumsy             | 0.32         | -0.02        | -0.11        | -0.09       | 0.30        | 0.20  |
| Protective         | 0.20         | <b>0.87</b>  | -0.13        | 0.07        | -0.35       | 0.77  |
| Helpful            | 0.00         | <b>0.85</b>  | -0.03        | 0.11        | -0.24       | 0.81  |
| Intelligent        | -0.12        | <b>0.78</b>  | 0.15         | -0.09       | -0.12       | 0.58  |
| Sympathetic        | -0.03        | <b>0.76</b>  | -0.15        | 0.03        | -0.17       | 0.75  |
| Affectionate       | 0.00         | <b>0.63</b>  | -0.19        | 0.18        | -0.12       | 0.65  |
| Sensitive          | -0.24        | <b>0.61</b>  | 0.04         | 0.13        | 0.24        | 0.72  |
| Dependent/follower | -0.02        | <b>0.57</b>  | -0.07        | 0.39        | 0.20        | 0.65  |
| Independent        | 0.13         | <b>-0.54</b> | 0.13         | 0.07        | -0.01       | 0.50  |
| Individualistic    | 0.24         | <b>-0.48</b> | 0.23         | 0.15        | 0.18        | 0.61  |
| Imitative          | -0.15        | <b>0.46</b>  | 0.11         | 0.33        | 0.25        | 0.46  |
| Gentle             | -0.28        | <b>0.45</b>  | -0.29        | 0.13        | 0.08        | 0.83  |
| Cautious           | 0.29         | <b>0.45</b>  | -0.03        | -0.34       | 0.28        | 0.40  |
| Solitary           | 0.21         | <b>-0.42</b> | 0.16         | -0.22       | 0.26        | 0.61  |
| Conventional       | -0.38        | <b>0.41</b>  | 0.03         | -0.10       | 0.36        | 0.67  |
| Sociable           | -0.25        | <b>0.40</b>  | -0.38        | 0.19        | -0.06       | 0.82  |
| Bullying           | 0.02         | 0.01         | <b>0.91</b>  | 0.05        | -0.02       | 0.84  |
| Aggressive         | 0.03         | -0.05        | <b>0.86</b>  | -0.01       | -0.11       | 0.88  |
| Jealous            | -0.03        | -0.07        | <b>0.86</b>  | 0.21        | 0.13        | 0.76  |
| Dominant           | -0.01        | -0.05        | <b>0.85</b>  | 0.03        | -0.09       | 0.80  |
| Stingy/greedy      | 0.04         | -0.21        | <b>0.78</b>  | 0.23        | 0.20        | 0.82  |
| Defiant            | 0.07         | 0.02         | <b>0.78</b>  | 0.02        | -0.13       | 0.70  |
| Manipulative       | -0.17        | <b>0.47</b>  | <b>0.51</b>  | 0.23        | -0.21       | 0.42  |
| Friendly           | -0.30        | 0.23         | <b>-0.42</b> | 0.25        | 0.22        | 0.83  |
| Curious            | 0.09         | 0.10         | 0.07         | <b>0.80</b> | 0.07        | 0.61  |
| Inquisitive        | -0.01        | 0.11         | 0.03         | <b>0.78</b> | 0.02        | 0.64  |
| Inventive          | -0.04        | 0.14         | 0.12         | <b>0.76</b> | 0.15        | 0.57  |
| Playful            | 0.16         | 0.12         | -0.05        | <b>0.76</b> | 0.01        | 0.58  |

|                        |       |       |       |             |             |      |
|------------------------|-------|-------|-------|-------------|-------------|------|
| Active                 | 0.36  | 0.01  | 0.14  | <b>0.69</b> | -0.03       | 0.59 |
| Autistic               | 0.06  | -0.09 | -0.07 | 0.39        | <b>0.66</b> | 0.41 |
| Vulnerable             | 0.03  | -0.19 | -0.04 | 0.01        | <b>0.51</b> | 0.27 |
| Submissive             | -0.14 | 0.31  | -0.14 | 0.06        | <b>0.47</b> | 0.54 |
| Lazy                   | -0.30 | -0.06 | -0.02 | -0.19       | <b>0.43</b> | 0.34 |
| Depressed              | -0.18 | -0.21 | 0.27  | -0.12       | <b>0.43</b> | 0.29 |
| Proportion of variance | 0.19  | 0.16  | 0.13  | 0.09        | 0.05        |      |

|     | Factor Correlations |       |       |       |      |
|-----|---------------------|-------|-------|-------|------|
|     | Imp                 | Soc   | Dom   | Opn   | Neg  |
| Imp | 1.00                |       |       |       |      |
| Soc | -0.62               | 1.00  |       |       |      |
| Dom | 0.51                | -0.55 | 1.00  |       |      |
| Opn | -0.15               | 0.18  | -0.08 | 1.00  |      |
| Neg | -0.04               | 0.15  | -0.17 | -0.34 | 1.00 |

*Note.*  $N = 128$ . Imp = Impulsiveness, Soc = Sociability, Dom = Dominance, Opn = Openness, Neg = Negative Affect,  $h^2$  = communalities. Factors extracted using a maximum likelihood estimation and rotated using the promax procedure. Factor loadings greater than or equal to  $|0.4|$  are in bold.

Table S10  
*Pattern Matrix from Second-Order Factor Analysis from Rater 1's Ratings*

| First-order Factor     | Second-order Factor |                            | $h^2$ |
|------------------------|---------------------|----------------------------|-------|
|                        | I                   | II                         |       |
| Sociability            | <b>-0.82</b>        | 0.03                       | 0.68  |
| Impulsiveness          | <b>0.76</b>         | 0.07                       | 0.57  |
| Dominance              | <b>0.66</b>         | -0.07                      | 0.45  |
| Openness               | -0.02               | < <b>1.00</b> <sup>1</sup> | 1.00  |
| Negative Affect        | -0.25               | -0.38                      | 0.18  |
| Proportion of variance | 0.35                | 0.23                       |       |

*Note.*  $N = 128$ . I = Pro-sociality (reversed), II = Boldness,  $h^2$  = communalities. <sup>1</sup> When rounded to three decimal places, this loading was equal to 0.995. Factors extracted using a maximum likelihood estimation and rotated using the promax procedure. Factor loadings greater than or equal to  $|0.4|$  are in bold. Factor correlation ( $r_{I, II}$ ) = -0.13.



Table S11  
*Pattern Matrix from the Factor Analysis of Rater 2's Ratings*

| Item               | Factor       |              |              |             | $h^2$ |
|--------------------|--------------|--------------|--------------|-------------|-------|
|                    | I            | II           | III          | IV          |       |
| Aggressive         | <b>0.82</b>  | 0.30         | -0.19        | -0.16       | 0.64  |
| Irritable          | <b>0.80</b>  | -0.01        | 0.10         | -0.08       | 0.59  |
| Excitable          | <b>0.79</b>  | 0.17         | 0.08         | -0.09       | 0.56  |
| Dominant           | <b>0.79</b>  | 0.33         | -0.28        | -0.13       | 0.67  |
| Defiant            | <b>0.75</b>  | 0.24         | -0.09        | -0.15       | 0.51  |
| Gentle             | <b>-0.73</b> | 0.31         | 0.07         | 0.12        | 0.71  |
| Manipulative       | <b>0.72</b>  | <b>0.40</b>  | -0.13        | -0.10       | 0.54  |
| Submissive         | <b>-0.70</b> | -0.13        | 0.03         | -0.02       | 0.49  |
| Affectionate       | <b>-0.64</b> | 0.33         | 0.13         | 0.07        | 0.66  |
| Friendly           | <b>-0.58</b> | 0.20         | 0.38         | 0.11        | 0.70  |
| Vulnerable         | <b>-0.54</b> | -0.10        | -0.08        | -0.10       | 0.34  |
| Bullying           | <b>0.53</b>  | 0.01         | -0.17        | 0.03        | 0.36  |
| Sympathetic        | <b>-0.52</b> | 0.18         | 0.35         | -0.04       | 0.59  |
| Stingy/greedy      | <b>0.51</b>  | -0.04        | -0.20        | 0.16        | 0.43  |
| Jealous            | <b>0.48</b>  | 0.01         | -0.16        | 0.08        | 0.31  |
| Lazy               | <b>-0.48</b> | <b>-0.43</b> | -0.28        | -0.21       | 0.62  |
| Impulsive          | <b>0.48</b>  | -0.29        | 0.16         | 0.27        | 0.47  |
| Depressed          | <b>-0.46</b> | -0.39        | -0.24        | -0.13       | 0.47  |
| Cool               | <b>-0.45</b> | 0.39         | -0.21        | -0.29       | 0.52  |
| Helpful            | <b>-0.40</b> | 0.30         | 0.38         | -0.03       | 0.59  |
| Predictable        | -0.31        | 0.02         | -0.13        | 0.30        | 0.11  |
| Conventional       | -0.31        | 0.25         | 0.13         | -0.25       | 0.33  |
| Intelligent        | 0.20         | <b>0.73</b>  | -0.07        | -0.01       | 0.49  |
| Timid              | -0.38        | <b>-0.64</b> | 0.08         | -0.21       | 0.58  |
| Sensitive          | -0.16        | <b>0.62</b>  | 0.04         | -0.18       | 0.49  |
| Stable             | -0.10        | <b>0.57</b>  | 0.15         | -0.07       | 0.45  |
| Clumsy             | -0.25        | <b>-0.54</b> | -0.08        | 0.06        | 0.32  |
| Sociable           | -0.34        | <b>0.43</b>  | 0.37         | 0.09        | 0.68  |
| Protective         | -0.37        | <b>0.42</b>  | 0.33         | 0.01        | 0.63  |
| Inventive          | 0.05         | <b>0.41</b>  | -0.01        | 0.16        | 0.21  |
| Erratic            | 0.26         | -0.34        | 0.04         | -0.09       | 0.21  |
| Autistic           | -0.14        | -0.30        | -0.06        | -0.02       | 0.11  |
| Disorganized       | 0.20         | -0.27        | 0.18         | 0.19        | 0.16  |
| Independent        | 0.07         | 0.10         | <b>-0.85</b> | 0.08        | 0.69  |
| Individualistic    | 0.06         | -0.04        | <b>-0.84</b> | 0.08        | 0.75  |
| Imitative          | -0.15        | -0.05        | <b>0.70</b>  | -0.07       | 0.53  |
| Solitary           | 0.05         | -0.28        | <b>-0.61</b> | -0.05       | 0.63  |
| Dependent/follower | <b>-0.42</b> | -0.12        | <b>0.49</b>  | -0.12       | 0.48  |
| Unemotional        | 0.02         | -0.06        | -0.31        | -0.11       | 0.14  |
| Reckless           | -0.06        | -0.06        | -0.07        | <b>0.83</b> | 0.63  |
| Thoughtless        | -0.01        | -0.02        | 0.00         | <b>0.74</b> | 0.54  |
| Curious            | 0.10         | 0.28         | -0.06        | <b>0.72</b> | 0.70  |

|                        |       |              |      |              |      |
|------------------------|-------|--------------|------|--------------|------|
| Playful                | -0.02 | 0.20         | 0.17 | <b>0.66</b>  | 0.60 |
| Cautious               | 0.29  | 0.01         | 0.15 | <b>-0.65</b> | 0.35 |
| Inquisitive            | 0.09  | 0.05         | 0.06 | <b>0.46</b>  | 0.27 |
| Fearful                | 0.13  | <b>-0.42</b> | 0.26 | <b>-0.44</b> | 0.35 |
| Active                 | 0.37  | 0.26         | 0.31 | <b>0.40</b>  | 0.61 |
| Distractible           | 0.04  | -0.07        | 0.04 | 0.38         | 0.15 |
| Proportion of variance | 0.19  | 0.10         | 0.10 | 0.09         |      |

|     | Factor Correlations |      |      |      |
|-----|---------------------|------|------|------|
|     | I                   | II   | III  | IV   |
| I   | 1.00                |      |      |      |
| II  | -0.17               | 1.00 |      |      |
| III | -0.19               | 0.40 | 1.00 |      |
| IV  | 0.36                | 0.16 | 0.14 | 1.00 |

*Note.*  $N = 128$ . Factors were not assigned labels.  $h^2$  = communalities. Factors extracted using a maximum likelihood estimation and rotated using the promax procedure. Factor loadings greater than or equal to  $|0.4|$  are in bold.

Table S12  
*Pattern Matrix from the Factor Analysis of Rater 3's Ratings*

| Item               | Factor       |              |              | $h^2$ |
|--------------------|--------------|--------------|--------------|-------|
|                    | I            | II           | III          |       |
| Aggressive         | <b>-0.89</b> | -0.08        | -0.05        | 0.76  |
| Gentle             | <b>0.82</b>  | 0.15         | -0.03        | 0.69  |
| Dominant           | <b>-0.82</b> | 0.02         | 0.04         | 0.68  |
| Bullying           | <b>-0.80</b> | 0.03         | 0.00         | 0.65  |
| Defiant            | <b>-0.80</b> | 0.06         | -0.02        | 0.65  |
| Stingy/greedy      | <b>-0.80</b> | 0.11         | -0.05        | 0.65  |
| Friendly           | <b>0.78</b>  | 0.19         | 0.08         | 0.60  |
| Affectionate       | <b>0.72</b>  | 0.19         | 0.07         | 0.51  |
| Irritable          | <b>-0.71</b> | -0.05        | 0.20         | 0.61  |
| Submissive         | <b>0.68</b>  | -0.11        | 0.25         | 0.47  |
| Jealous            | <b>-0.66</b> | 0.12         | 0.17         | 0.54  |
| Cautious           | <b>0.58</b>  | -0.19        | 0.01         | 0.39  |
| Sociable           | <b>0.58</b>  | 0.39         | -0.18        | 0.54  |
| Intelligent        | <b>0.55</b>  | 0.07         | 0.00         | 0.31  |
| Sympathetic        | <b>0.55</b>  | <b>0.49</b>  | 0.14         | 0.48  |
| Reckless           | <b>-0.52</b> | 0.02         | 0.17         | 0.34  |
| Excitable          | <b>-0.52</b> | -0.01        | <b>0.48</b>  | 0.61  |
| Manipulative       | <b>-0.49</b> | 0.16         | -0.18        | 0.27  |
| Cool               | <b>0.47</b>  | -0.19        | -0.46        | 0.58  |
| Protective         | <b>0.47</b>  | 0.36         | 0.00         | 0.32  |
| Autistic           | <b>0.46</b>  | -0.18        | 0.34         | 0.30  |
| Sensitive          | <b>0.46</b>  | 0.19         | 0.00         | 0.23  |
| Erratic            | <b>-0.45</b> | -0.04        | 0.14         | 0.25  |
| Disorganized       | <b>-0.43</b> | 0.09         | 0.08         | 0.22  |
| Conventional       | <b>0.40</b>  | 0.03         | -0.24        | 0.27  |
| Thoughtless        | -0.39        | 0.25         | 0.20         | 0.31  |
| Solitary           | -0.16        | <b>-0.70</b> | 0.14         | 0.53  |
| Active             | -0.32        | <b>0.59</b>  | 0.09         | 0.51  |
| Depressed          | 0.24         | <b>-0.58</b> | 0.33         | 0.50  |
| Lazy               | 0.21         | <b>-0.54</b> | -0.18        | 0.41  |
| Helpful            | <b>0.46</b>  | <b>0.52</b>  | 0.04         | 0.43  |
| Imitative          | 0.17         | <b>0.51</b>  | 0.04         | 0.28  |
| Playful            | 0.15         | <b>0.50</b>  | 0.07         | 0.26  |
| Inquisitive        | -0.15        | <b>0.45</b>  | -0.15        | 0.25  |
| Independent        | -0.33        | <b>-0.41</b> | -0.16        | 0.25  |
| Curious            | -0.07        | 0.35         | 0.13         | 0.15  |
| Clumsy             | 0.14         | -0.30        | 0.27         | 0.17  |
| Dependent/follower | 0.10         | 0.24         | 0.02         | 0.06  |
| Inventive          | -0.10        | 0.18         | -0.01        | 0.04  |
| Timid              | 0.20         | -0.12        | <b>0.72</b>  | 0.51  |
| Stable             | 0.06         | 0.04         | <b>-0.64</b> | 0.43  |
| Impulsive          | -0.19        | 0.15         | <b>0.62</b>  | 0.50  |

|                        |       |       |              |      |
|------------------------|-------|-------|--------------|------|
| Unemotional            | 0.32  | -0.25 | <b>-0.61</b> | 0.64 |
| Vulnerable             | 0.35  | -0.22 | <b>0.57</b>  | 0.42 |
| Predictable            | 0.30  | -0.08 | <b>-0.47</b> | 0.39 |
| Fearful                | 0.05  | 0.00  | <b>0.42</b>  | 0.17 |
| Distractible           | -0.08 | 0.23  | 0.39         | 0.23 |
| Individualistic        | -0.22 | -0.14 | 0.30         | 0.19 |
| Proportion of variance | 0.24  | 0.08  | 0.08         |      |

|     | Factor Correlations |       |       |
|-----|---------------------|-------|-------|
|     | I                   | II    | III   |
| I   | 1.00                | -0.08 | -0.24 |
| II  | -0.08               | 1.00  | -0.02 |
| III | -0.24               | -0.02 | 1.00  |

*Note.*  $N = 81$ . Factors were not assigned labels.  $h^2 =$  communalities. Factors extracted using a maximum likelihood estimation and rotated using the promax procedure. Factor loadings greater than or equal to  $|0.4|$  are in bold.

Table S13

*Pattern Matrix from the Factor Analysis of The Weighted Correlation Matrix ( $P_w$ )*

| Item               | Factor        |               |              | $h^2$ |
|--------------------|---------------|---------------|--------------|-------|
|                    | Pro-sociality | Impulsiveness | Boldness     |       |
| Friendly           | <b>0.82</b>   | -0.06         | -0.01        | 0.71  |
| Aggressive         | <b>-0.79</b>  | 0.01          | <b>0.40</b>  | 0.72  |
| Dominant           | <b>-0.78</b>  | -0.02         | 0.42         | 0.69  |
| Gentle             | <b>0.75</b>   | -0.19         | -0.01        | 0.71  |
| Sociable           | <b>0.73</b>   | -0.10         | 0.26         | 0.70  |
| Bullying           | <b>-0.70</b>  | 0.04          | 0.32         | 0.57  |
| Affectionate       | <b>0.70</b>   | -0.08         | 0.06         | 0.56  |
| Sympathetic        | <b>0.70</b>   | -0.05         | 0.11         | 0.55  |
| Stingy/greedy      | <b>-0.66</b>  | 0.13          | 0.29         | 0.58  |
| Defiant            | <b>-0.66</b>  | 0.06          | 0.39         | 0.57  |
| Helpful            | <b>0.65</b>   | -0.05         | 0.26         | 0.56  |
| Protective         | <b>0.64</b>   | -0.01         | 0.25         | 0.51  |
| Jealous            | <b>-0.59</b>  | 0.12          | 0.30         | 0.48  |
| Independent        | <b>-0.58</b>  | -0.06         | -0.10        | 0.33  |
| Dependent/follower | <b>0.56</b>   | 0.03          | 0.05         | 0.31  |
| Solitary           | <b>-0.55</b>  | -0.03         | <b>-0.45</b> | 0.55  |
| Irritable          | <b>-0.54</b>  | 0.30          | 0.20         | 0.55  |
| Submissive         | <b>0.54</b>   | -0.09         | -0.35        | 0.42  |
| Imitative          | <b>0.51</b>   | 0.08          | 0.20         | 0.30  |
| Individualistic    | <b>-0.50</b>  | 0.14          | -0.20        | 0.39  |
| Sensitive          | <b>0.45</b>   | -0.25         | 0.20         | 0.41  |
| Impulsive          | -0.12         | <b>0.68</b>   | -0.09        | 0.54  |
| Reckless           | -0.11         | <b>0.63</b>   | 0.06         | 0.47  |
| Cool               | 0.23          | <b>-0.61</b>  | 0.01         | 0.55  |
| Thoughtless        | -0.01         | <b>0.61</b>   | 0.13         | 0.41  |
| Distractible       | 0.02          | <b>0.60</b>   | -0.03        | 0.34  |
| Unemotional        | -0.04         | <b>-0.59</b>  | -0.04        | 0.33  |
| Disorganized       | -0.16         | <b>0.47</b>   | -0.05        | 0.31  |
| Excitable          | -0.33         | <b>0.47</b>   | 0.08         | 0.48  |
| Stable             | 0.23          | <b>-0.45</b>  | 0.33         | 0.44  |
| Predictable        | 0.10          | <b>-0.45</b>  | 0.07         | 0.24  |
| Conventional       | 0.35          | -0.37         | -0.02        | 0.38  |
| Erratic            | -0.31         | 0.36          | -0.15        | 0.35  |
| Manipulative       | -0.37         | -0.21         | <b>0.60</b>  | 0.39  |
| Timid              | 0.06          | 0.33          | <b>-0.58</b> | 0.38  |
| Active             | 0.10          | 0.51          | <b>0.52</b>  | 0.56  |
| Depressed          | -0.12         | -0.12         | <b>-0.51</b> | 0.31  |
| Curious            | 0.18          | 0.31          | <b>0.49</b>  | 0.37  |
| Lazy               | -0.04         | -0.36         | <b>-0.48</b> | 0.40  |
| Vulnerable         | 0.22          | 0.10          | <b>-0.45</b> | 0.21  |
| Playful            | 0.39          | <b>0.40</b>   | <b>0.43</b>  | 0.44  |
| Clumsy             | -0.01         | 0.12          | <b>-0.42</b> | 0.18  |

|                        |       |       |             |      |
|------------------------|-------|-------|-------------|------|
| Inquisitive            | 0.19  | 0.23  | <b>0.42</b> | 0.27 |
| Fearful                | -0.02 | 0.23  | -0.38       | 0.19 |
| Inventive              | 0.20  | 0.13  | 0.38        | 0.21 |
| Autistic               | 0.17  | 0.09  | -0.33       | 0.11 |
| Intelligent            | 0.27  | -0.22 | 0.32        | 0.29 |
| Cautious               | 0.05  | -0.20 | -0.25       | 0.12 |
| Proportion of variance | 0.22  | 0.11  | 0.10        |      |

|               | Factor Correlations |               |          |
|---------------|---------------------|---------------|----------|
|               | Pro-sociality       | Impulsiveness | Boldness |
| Pro-sociality | 1.00                |               |          |
| Impulsiveness | -0.44               | 1.00          |          |
| Boldness      | 0.11                | 0.11          | 1.00     |

*Note.*  $N = 128$ .  $h^2 =$  communalities. Factors extracted using a maximum likelihood estimation and rotated using the promax procedure. Factor loadings greater than or equal to |0.4| are in bold.

Table S14

*Pattern Matrix from the Factor Analysis of the Weighted Correlation Matrix ( $P_w$ )*

| Item               | Factor       |              |             |              |             | $h^2$ |
|--------------------|--------------|--------------|-------------|--------------|-------------|-------|
|                    | Soc          | Imp          | Dom         | Opn          | Neg         |       |
| Helpful            | <b>0.85</b>  | 0.02         | 0.08        | 0.01         | 0.00        | 0.66  |
| Sympathetic        | <b>0.78</b>  | 0.01         | -0.03       | 0.01         | 0.10        | 0.62  |
| Protective         | <b>0.76</b>  | 0.05         | 0.00        | 0.03         | -0.05       | 0.57  |
| Affectionate       | <b>0.65</b>  | -0.12        | -0.07       | 0.13         | 0.18        | 0.61  |
| Dependent/follower | <b>0.63</b>  | 0.03         | 0.03        | 0.08         | 0.21        | 0.38  |
| Independent        | <b>-0.63</b> | -0.21        | 0.19        | 0.15         | 0.16        | 0.42  |
| Solitary           | <b>-0.62</b> | -0.08        | 0.07        | -0.10        | 0.33        | 0.59  |
| Sociable           | <b>0.60</b>  | -0.13        | -0.18       | 0.16         | -0.11       | 0.70  |
| Imitative          | <b>0.59</b>  | 0.09         | 0.01        | 0.10         | 0.02        | 0.32  |
| Sensitive          | <b>0.57</b>  | -0.24        | 0.10        | 0.03         | 0.05        | 0.44  |
| Gentle             | <b>0.56</b>  | -0.27        | -0.16       | 0.15         | 0.22        | 0.75  |
| Friendly           | <b>0.56</b>  | -0.09        | -0.32       | 0.11         | 0.08        | 0.70  |
| Individualistic    | <b>-0.54</b> | 0.00         | 0.17        | 0.18         | 0.31        | 0.48  |
| Conventional       | <b>0.50</b>  | -0.32        | 0.13        | -0.17        | 0.17        | 0.46  |
| Intelligent        | <b>0.43</b>  | -0.20        | 0.13        | 0.04         | -0.12       | 0.29  |
| Impulsive          | -0.02        | <b>0.75</b>  | -0.03       | 0.00         | 0.03        | 0.56  |
| Cool               | 0.09         | <b>-0.71</b> | -0.01       | 0.03         | 0.09        | 0.58  |
| Unemotional        | -0.19        | <b>-0.67</b> | -0.01       | -0.02        | 0.01        | 0.37  |
| Excitable          | 0.03         | <b>0.62</b>  | 0.22        | -0.13        | -0.09       | 0.55  |
| Distractible       | -0.03        | <b>0.54</b>  | -0.05       | 0.22         | 0.11        | 0.34  |
| Predictable        | 0.02         | <b>-0.51</b> | 0.03        | 0.04         | 0.01        | 0.26  |
| Fearful            | 0.22         | <b>0.49</b>  | 0.01        | <b>-0.47</b> | 0.18        | 0.40  |
| Stable             | 0.11         | <b>-0.48</b> | -0.11       | 0.05         | -0.37       | 0.50  |
| Thoughtless        | -0.13        | <b>0.47</b>  | -0.05       | <b>0.43</b>  | 0.05        | 0.47  |
| Reckless           | -0.29        | <b>0.47</b>  | -0.09       | <b>0.45</b>  | 0.08        | 0.56  |
| Irritable          | -0.04        | <b>0.47</b>  | 0.40        | -0.18        | -0.17       | 0.63  |
| Disorganized       | -0.12        | <b>0.46</b>  | 0.01        | 0.09         | 0.05        | 0.31  |
| Active             | 0.23         | <b>0.45</b>  | 0.10        | 0.39         | -0.24       | 0.56  |
| Erratic            | -0.16        | <b>0.44</b>  | 0.09        | -0.13        | 0.05        | 0.36  |
| Jealous            | 0.00         | 0.06         | <b>0.79</b> | 0.17         | 0.23        | 0.66  |
| Dominant           | -0.16        | 0.01         | <b>0.74</b> | 0.02         | -0.08       | 0.73  |
| Bullying           | -0.12        | 0.03         | <b>0.73</b> | 0.06         | 0.06        | 0.65  |
| Stingy/greedy      | -0.17        | 0.04         | <b>0.71</b> | 0.20         | 0.16        | 0.70  |
| Aggressive         | -0.15        | 0.07         | <b>0.70</b> | -0.04        | -0.13       | 0.74  |
| Manipulative       | 0.18         | -0.18        | <b>0.61</b> | 0.05         | -0.22       | 0.40  |
| Defiant            | -0.13        | 0.12         | <b>0.56</b> | -0.02        | -0.17       | 0.58  |
| Curious            | 0.18         | 0.06         | 0.20        | <b>0.69</b>  | 0.08        | 0.54  |
| Playful            | 0.28         | 0.21         | -0.03       | <b>0.62</b>  | -0.01       | 0.53  |
| Inquisitive        | 0.12         | 0.04         | 0.05        | <b>0.53</b>  | -0.06       | 0.35  |
| Cautious           | 0.34         | 0.04         | 0.11        | <b>-0.52</b> | 0.10        | 0.32  |
| Inventive          | 0.18         | -0.05        | 0.13        | <b>0.49</b>  | 0.05        | 0.28  |
| Vulnerable         | 0.14         | 0.05         | -0.01       | 0.01         | <b>0.60</b> | 0.35  |

|                        |       |              |       |       |             |      |
|------------------------|-------|--------------|-------|-------|-------------|------|
| Depressed              | -0.17 | -0.17        | 0.08  | -0.10 | <b>0.57</b> | 0.43 |
| Timid                  | 0.09  | <b>0.41</b>  | -0.03 | -0.21 | <b>0.55</b> | 0.53 |
| Autistic               | 0.04  | 0.00         | -0.02 | 0.12  | <b>0.50</b> | 0.22 |
| Lazy                   | -0.19 | <b>-0.43</b> | -0.01 | -0.13 | <b>0.47</b> | 0.48 |
| Submissive             | 0.37  | -0.12        | -0.15 | -0.02 | <b>0.45</b> | 0.51 |
| Clumsy                 | -0.07 | 0.12         | -0.03 | -0.10 | 0.38        | 0.22 |
| Proportion of variance | 0.16  | 0.12         | 0.10  | 0.06  | 0.06        |      |

|     | Factor Correlations |       |       |       |      |
|-----|---------------------|-------|-------|-------|------|
|     | Soc                 | Imp   | Dom   | Opn   | Neg  |
| Soc | 1.00                |       |       |       |      |
| Imp | -0.51               | 1.00  |       |       |      |
| Dom | -0.49               | 0.48  | 1.00  |       |      |
| Opn | 0.15                | 0.10  | 0.09  | 1.00  |      |
| Neg | -0.10               | -0.03 | -0.26 | -0.39 | 1.00 |

*Note.*  $N = 128$ . Soc = Sociability, Dom = Dominance, Imp = Impulsiveness, Opn = Openness, Neg = Negative Affect,  $h^2$  = communalities. Factors extracted using a maximum likelihood estimation and rotated using the promax procedure. Factor loadings greater than or equal to  $|0.4|$  are in bold.



Table S15

*Pattern Matrix from Second-Order Factor Analysis from the Weighted Correlation Matrix ( $P_w$ )*

| First-order factor     | Second-order factor         |              |       |
|------------------------|-----------------------------|--------------|-------|
|                        | Pro-sociality<br>(reversed) | Boldness     | $h^2$ |
| Sociability            | <b>-0.79</b>                | 0.25         | 0.66  |
| Impulsiveness          | <b>0.66</b>                 | 0.01         | 0.44  |
| Dominance              | <b>0.70</b>                 | 0.24         | 0.57  |
| Openness               | -0.03                       | <b>0.53</b>  | 0.28  |
| Negative Affect        | -0.04                       | <b>-0.74</b> | 0.56  |
| Proportion of variance | 0.31                        | 0.19         |       |

*Note.*  $N = 128$ .  $h^2$  = communalities. Factors extracted using a maximum likelihood estimation and rotated using the promax procedure. Factor loadings greater than or equal to  $|0.4|$  are in bold. Factor correlation ( $r_{I,II}$ ) = 0.08.

Table S16  
*Effects of G840C Genotype on Personality Domains*

|                        | <i>b</i> | <i>SE</i> | <i>t</i> | <i>p</i> |
|------------------------|----------|-----------|----------|----------|
| <b>Sociability</b>     |          |           |          |          |
| Intercept              | 0.85     | 0.30      | 2.81     | 0.01     |
| Male vs. Female        | -0.75    | 0.22      | -3.49    | < 0.001  |
| Age                    | -0.01    | 0.03      | -0.34    | 0.74     |
| GC vs. CC              | -0.22    | 0.23      | -0.95    | 0.35     |
| GG vs. CC              | -0.33    | 0.27      | -1.21    | 0.23     |
| <b>Dominance</b>       |          |           |          |          |
| Intercept              | -0.94    | 0.30      | -3.08    | 0.00     |
| Male vs. Female        | 0.70     | 0.22      | 3.23     | 0.00     |
| Age                    | -0.01    | 0.03      | -0.20    | 0.84     |
| GC vs. CC              | 0.51     | 0.23      | 2.19     | 0.03     |
| GG vs. CC              | 0.58     | 0.27      | 2.12     | 0.04     |
| <b>Impulsiveness</b>   |          |           |          |          |
| Intercept              | -0.59    | 0.30      | -1.96    | 0.05     |
| Male vs. Female        | 0.65     | 0.22      | 3.01     | 0.00     |
| Age                    | -0.02    | 0.03      | -0.68    | 0.50     |
| GC vs. CC              | 0.17     | 0.23      | 0.73     | 0.47     |
| GG vs. CC              | 0.37     | 0.27      | 1.35     | 0.18     |
| <b>Openness</b>        |          |           |          |          |
| Intercept              | -0.08    | 0.30      | -0.26    | 0.80     |
| Male vs. Female        | 0.45     | 0.22      | 2.08     | 0.04     |
| Age                    | -0.05    | 0.03      | -1.41    | 0.16     |
| GC vs. CC              | -0.03    | 0.23      | -0.12    | 0.91     |
| GG vs. CC              | -0.09    | 0.27      | -0.31    | 0.75     |
| <b>Negative Affect</b> |          |           |          |          |
| Intercept              | 0.47     | 0.32      | 1.49     | 0.14     |
| Male vs. Female        | -0.14    | 0.23      | -0.61    | 0.54     |
| Age                    | -0.06    | 0.03      | -1.59    | 0.11     |
| GC vs. CC              | -0.10    | 0.24      | -0.41    | 0.69     |
| GG vs. CC              | -0.16    | 0.29      | -0.55    | 0.58     |
| <b>Pro-sociality</b>   |          |           |          |          |
| Intercept              | 0.94     | 0.30      | 3.16     | 0.00     |
| Male vs. Female        | -0.81    | 0.21      | -3.83    | < 0.001  |
| Age                    | 0.01     | 0.03      | 0.18     | 0.86     |
| GC vs. CC              | -0.37    | 0.23      | -1.63    | 0.11     |
| GG vs. CC              | -0.51    | 0.27      | -1.90    | 0.06     |
| <b>Boldness</b>        |          |           |          |          |
| Intercept              | -0.31    | 0.31      | -1.01    | 0.32     |
| Male vs. Female        | 0.36     | 0.22      | 1.62     | 0.11     |
| Age                    | 0.00     | 0.03      | 0.05     | 0.96     |
| GC vs. CC              | 0.04     | 0.24      | 0.16     | 0.87     |
| GG vs. CC              | 0.03     | 0.28      | 0.12     | 0.90     |

Note. *N* = 122.

Table S17  
*Effects of G840C Genotype on Personality Domains*

|                 | Genotype             |           |          |          |                      |           |          |          |
|-----------------|----------------------|-----------|----------|----------|----------------------|-----------|----------|----------|
|                 | C Present vs. Absent |           |          |          | G Present vs. Absent |           |          |          |
|                 | <i>b</i>             | <i>SE</i> | <i>t</i> | <i>p</i> | <i>b</i>             | <i>SE</i> | <i>t</i> | <i>p</i> |
| Sociability     |                      |           |          |          |                      |           |          |          |
| Intercept       | 0.49                 | 0.28      | 1.76     | 0.08     | 0.86                 | 0.30      | 2.87     | 0.01     |
| Male vs. Female | -0.74                | 0.21      | -3.43    | < 0.001  | -0.75                | 0.21      | -3.50    | < 0.001  |
| Age             | -0.01                | 0.03      | -0.23    | 0.82     | -0.01                | 0.03      | -0.40    | 0.69     |
| Genotype        | 0.17                 | 0.21      | 0.79     | 0.43     | -0.25                | 0.22      | -1.13    | 0.26     |
| Impulsiveness   |                      |           |          |          |                      |           |          |          |
| Intercept       | -0.28                | 0.29      | -1.00    | 0.32     | -0.94                | 0.30      | -3.12    | 0.00     |
| Male vs. Female | 0.66                 | 0.22      | 3.02     | 0.00     | 0.70                 | 0.22      | 3.24     | 0.00     |
| Age             | -0.01                | 0.03      | -0.44    | 0.66     | -0.01                | 0.03      | -0.16    | 0.87     |
| Genotype        | -0.20                | 0.21      | -0.93    | 0.36     | 0.53                 | 0.22      | 2.37     | 0.02     |
| Dominance       |                      |           |          |          |                      |           |          |          |
| Intercept       | -0.20                | 0.28      | -0.72    | 0.47     | -0.61                | 0.30      | -2.03    | 0.04     |
| Male vs. Female | 0.64                 | 0.21      | 2.97     | 0.00     | 0.65                 | 0.22      | 3.01     | 0.00     |
| Age             | -0.03                | 0.03      | -0.77    | 0.44     | -0.02                | 0.03      | -0.57    | 0.57     |
| Genotype        | -0.24                | 0.21      | -1.16    | 0.25     | 0.23                 | 0.22      | 1.01     | 0.31     |
| Openness        |                      |           |          |          |                      |           |          |          |
| Intercept       | -0.17                | 0.28      | -0.60    | 0.55     | -0.07                | 0.30      | -0.24    | 0.81     |
| Male vs. Female | 0.45                 | 0.21      | 2.10     | 0.04     | 0.45                 | 0.22      | 2.09     | 0.04     |
| Age             | -0.05                | 0.03      | -1.41    | 0.16     | -0.05                | 0.03      | -1.46    | 0.15     |
| Genotype        | 0.07                 | 0.21      | 0.31     | 0.76     | -0.04                | 0.22      | -0.20    | 0.84     |
| Negative Affect |                      |           |          |          |                      |           |          |          |
| Intercept       | 0.30                 | 0.29      | 1.03     | 0.31     | 0.48                 | 0.32      | 1.52     | 0.13     |
| Male vs. Female | -0.13                | 0.23      | -0.58    | 0.56     | -0.14                | 0.23      | -0.61    | 0.54     |
| Age             | -0.05                | 0.03      | -1.56    | 0.12     | -0.06                | 0.03      | -1.64    | 0.10     |
| Genotype        | 0.08                 | 0.22      | 0.38     | 0.70     | -0.12                | 0.23      | -0.49    | 0.62     |
| Pro-sociality   |                      |           |          |          |                      |           |          |          |
| Intercept       | 0.38                 | 0.28      | 1.38     | 0.17     | 0.96                 | 0.30      | 3.22     | 0.00     |
| Male vs. Female | -0.79                | 0.21      | -3.69    | < 0.001  | -0.81                | 0.21      | -3.84    | < 0.001  |
| Age             | 0.01                 | 0.03      | 0.37     | 0.72     | 0.00                 | 0.03      | 0.10     | 0.92     |
| Genotype        | 0.23                 | 0.21      | 1.11     | 0.27     | -0.41                | 0.22      | -1.87    | 0.06     |
| Boldness        |                      |           |          |          |                      |           |          |          |
| Intercept       | -0.28                | 0.29      | -0.96    | 0.34     | -0.31                | 0.31      | -1.01    | 0.31     |
| Male vs. Female | 0.36                 | 0.22      | 1.62     | 0.11     | 0.36                 | 0.22      | 1.63     | 0.11     |
| Age             | 0.00                 | 0.03      | 0.03     | 0.98     | 0.00                 | 0.03      | 0.05     | 0.96     |
| Genotype        | -0.01                | 0.22      | -0.03    | 0.98     | 0.04                 | 0.23      | 0.16     | 0.87     |

Note. *N* = 122.

Table S18  
*Effects of T901A Genotype on Personality Domains*

|                        | <i>b</i> | <i>SE</i> | <i>t</i> | <i>p</i> |
|------------------------|----------|-----------|----------|----------|
| <b>Sociability</b>     |          |           |          |          |
| Intercept              | 0.73     | 0.24      | 3.12     | 0.00     |
| Male vs. Female        | -0.72    | 0.21      | -3.43    | < 0.001  |
| Age                    | 0.01     | 0.03      | 0.17     | 0.87     |
| T allele present       | -0.26    | 0.19      | -1.39    | 0.17     |
| <b>Impulsiveness</b>   |          |           |          |          |
| Intercept              | -0.59    | 0.23      | -2.50    | 0.01     |
| Male vs. Female        | 0.64     | 0.21      | 3.07     | 0.00     |
| Age                    | -0.03    | 0.03      | -0.89    | 0.38     |
| T allele present       | 0.29     | 0.19      | 1.54     | 0.13     |
| <b>Dominance</b>       |          |           |          |          |
| Intercept              | -0.37    | 0.23      | -1.58    | 0.12     |
| Male vs. Female        | 0.64     | 0.21      | 3.07     | 0.00     |
| Age                    | -0.04    | 0.03      | -1.19    | 0.24     |
| T allele present       | 0.05     | 0.19      | 0.27     | 0.79     |
| <b>Openness</b>        |          |           |          |          |
| Intercept              | -0.09    | 0.25      | -0.36    | 0.72     |
| Male vs. Female        | 0.59     | 0.22      | 2.67     | 0.01     |
| Age                    | -0.05    | 0.03      | -1.34    | 0.18     |
| T allele present       | -0.20    | 0.20      | -0.99    | 0.32     |
| <b>Negative Affect</b> |          |           |          |          |
| Intercept              | 0.35     | 0.25      | 1.42     | 0.16     |
| Male vs. Female        | -0.15    | 0.22      | -0.66    | 0.51     |
| Age                    | -0.05    | 0.03      | -1.49    | 0.14     |
| T allele present       | 0.02     | 0.20      | 0.10     | 0.92     |
| <b>Pro-sociality</b>   |          |           |          |          |
| Intercept              | 0.67     | 0.23      | 2.92     | 0.00     |
| Male vs. Female        | -0.77    | 0.20      | -3.79    | < 0.001  |
| Age                    | 0.03     | 0.03      | 0.87     | 0.39     |
| T allele present       | -0.25    | 0.19      | -1.36    | 0.18     |
| <b>Boldness</b>        |          |           |          |          |
| Intercept              | -0.25    | 0.25      | -1.02    | 0.31     |
| Male vs. Female        | 0.45     | 0.22      | 2.03     | 0.05     |
| Age                    | 0.00     | 0.03      | 0.00     | > 0.99   |
| T allele present       | -0.14    | 0.20      | -0.67    | 0.50     |

Note. *N* = 123

## References

- Inoue-Murayama, M., Yokoyama, C., Yamanashi, Y., & Weiss, A. (2018). Common marmoset (*Callithrix jacchus*) personality, subjective well-being, hair cortisol level, and *AVPR1a*, *OPRM1*, and *DAT* genotypes. *Scientific Reports*, *8*, Article 10255. <https://doi.org/10.1038/s41598-018-28112-7>
- Iwanicki, S., & Lehmann, J. (2015). Behavioral and trait rating assessments of personality in common marmosets (*Callithrix jacchus*). *Journal of Comparative Psychology*, *129*(3), 205-217. <https://doi.org/10.1037/a0039318>
- Koski, S. E., Buchanan-Smith, H., Ash, H., Burkart, J., Bugnyar, T., & Weiss, A. (2017). Common marmoset (*Callithrix jacchus*) personality. *Journal of Comparative Psychology*, *131*(4), 326-336. <https://doi.org/10.1037/com0000089>
